# Supplementary material for: Urinary CE-MS peptide marker pattern for detection of solid tumors
Source: PubMed Central journal article supplement (PMC5869723; doi:10.1038/s41598-018-23585-y), 2018-03-27
Supplement: 41598_2018_23585_MOESM1_ESM.pdf [file 41598_2018_23585_MOESM1_ESM.pdf]

# Urinary CE-MS peptide marker pattern for detection of solid tumors

Iwona Belczacka<sup>1,2</sup>, Agnieszka Latosinska<sup>1</sup>, Justyna Siwy<sup>1</sup>, Jochen Metzger<sup>1</sup>, Axel S. Merseburger<sup>3</sup>, Harald Mischak<sup>1,4</sup>, Antonia Vlahou<sup>5</sup>, Maria Frantzi<sup>1</sup>, Vera Jankowski<sup>2\*</sup>

<sup>1</sup>*Mosaiques Diagnostics GmbH, Hannover, Germany;*

<sup>2</sup>*University Hospital RWTH Aachen, Institute for Molecular Cardiovascular Research (IMCAR), Aachen, Germany;*

<sup>3</sup>*Department of Urology, University of Lübeck, Lübeck, Germany;*

<sup>4</sup>*University of Glasgow, Institute of Cardiovascular and Medical Sciences, Glasgow, United Kingdom;*

<sup>5</sup>*Biotechnology Division, Biomedical Research Foundation, Academy of Athens (BRFAA), Athens, Greece;*

## **Supplementary Files**

**Supplementary Figure S1.** Comparison of the classification scores with the previously published peptide marker patterns for the detection of **A.** bladder cancer, **B.** prostate cancer, **C.** cholangiocarcinoma, **D.** renal cell carcinoma, **E.** pancreatic cancer. *AUC*, Area under the curve.

**Supplementary Figure S2.** Representation of the nomogram classification scores between non-invasive and invasive cancer cases. The optimal cut-off (>0.54) was estimated based on the nomogram scores according to the Youden index.

**Supplementary Table S1.** List of the 193 peptides that were included in the peptide biomarker panels for the detection of solid tumors. *Amp*, Amplitude; *AUC*, Area under the curve; *BH*, Benjamini/ Hochberg; *CE-MS*, Capillary Electrophoresis coupled to Mass Spectrometry; *Da*, Dalton; *min*, minutes; *FDR adj.*, False Discovery Rate adjustment.

**Supplementary Table S2.** Investigation of the distribution of the 193 peptide markers in individual cancers. Statistical analyses were performed in the discovery set using the Wilcoxon rank sum test for each cancer group separately, followed by adjustment using Benjamini-Hochberg method. Each analysis was repeated ten times by excluding randomly 30% of the samples in both groups and applying the frequency threshold of 70% (at least in one group). The results of the analysis are presented in the table. Adjusted  $p$ -values of the Wilcoxon rank sum test are reported. Non-significant peptides are reported as n.s. N/A denotes peptides that were not commonly detected in all 10 permutations with at least 70% frequency. Peptides that were observed as statistically significant in the discovery set of one cancer type (adj.  $p$ -value highlighted in red) were considered for further analysis in the validation set (unadjusted  $p$ -values of Wilcoxon rank sum test are reported). Only those peptides that were observed as statistically significant in both discovery and validation sets are considered as cancer-type specific peptides (17 peptides highlighted in grey color). *CE-MS*, *Capillary Electrophoresis coupled to Mass Spectrometry*; *Da*, *Dalton*; *min*, *minutes*; *N/A*, *peptides that were not commonly detected in all 10 permutations with at least 70% frequency*; *P*, *p-value*; *n.s.*, *non-significant*.

**Supplementary Table S3.** Distribution of the clinical data of patients used in the study.

**Supplementary Table S4.** Clinical and demographical data for the full list of 2,055 urinary profiling datasets, from patients presenting with one of five types of solid tumors, separated in 1,420 urine samples that were included in the discovery phase and 635 urine samples that were included in the validation phase.

# Supplementary Figure S1

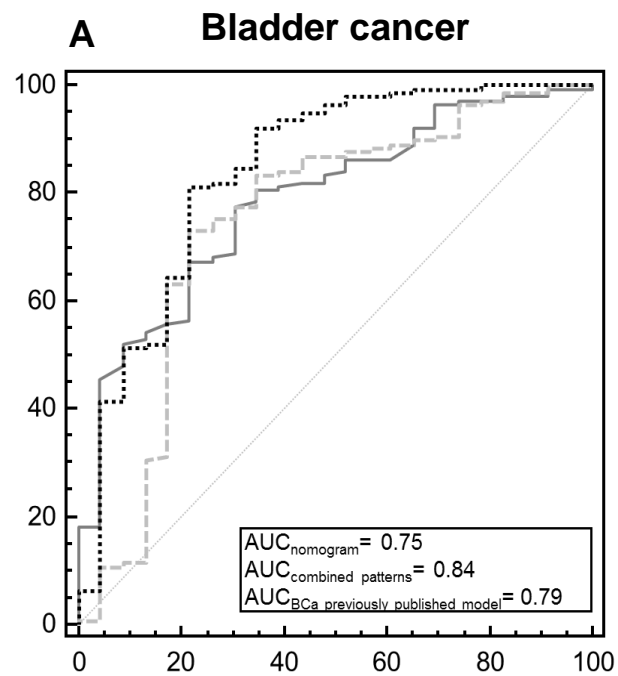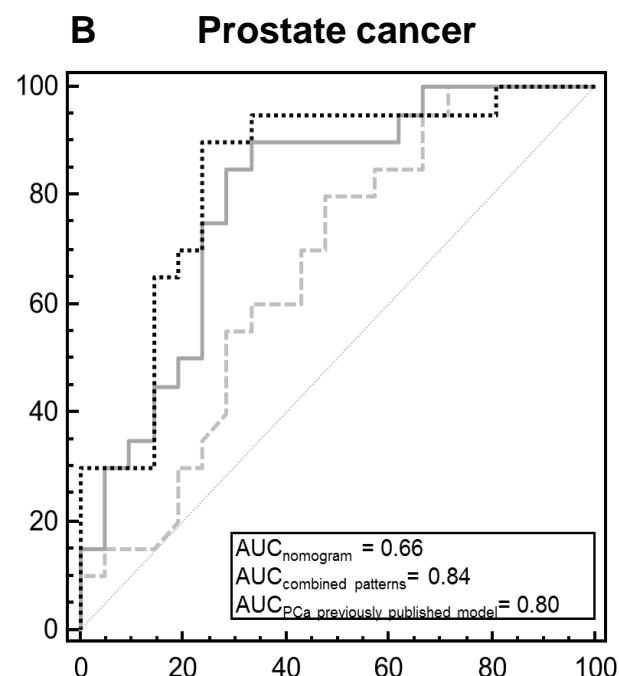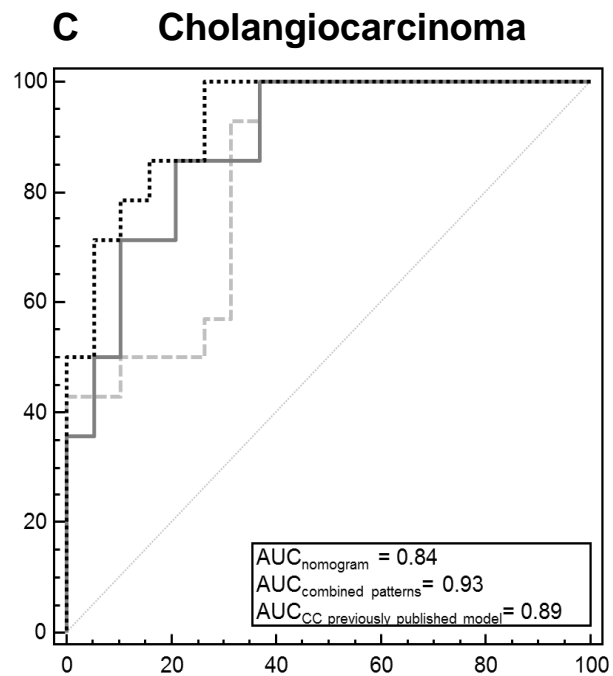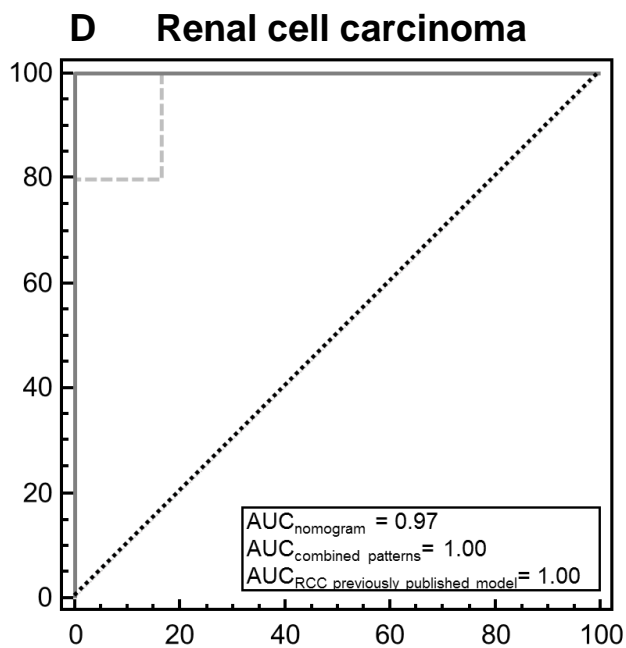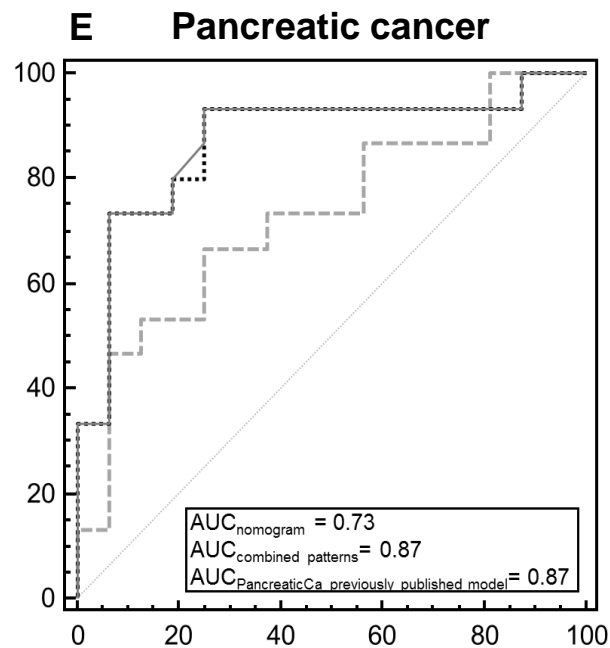

Sensitivity [%]  
 100-Specificity [%]

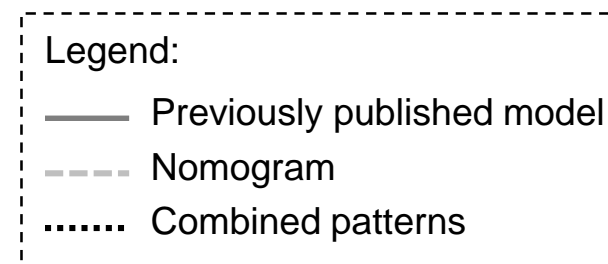

Significance *p*-value is presented in Table 1.

Supplementary Figure S2

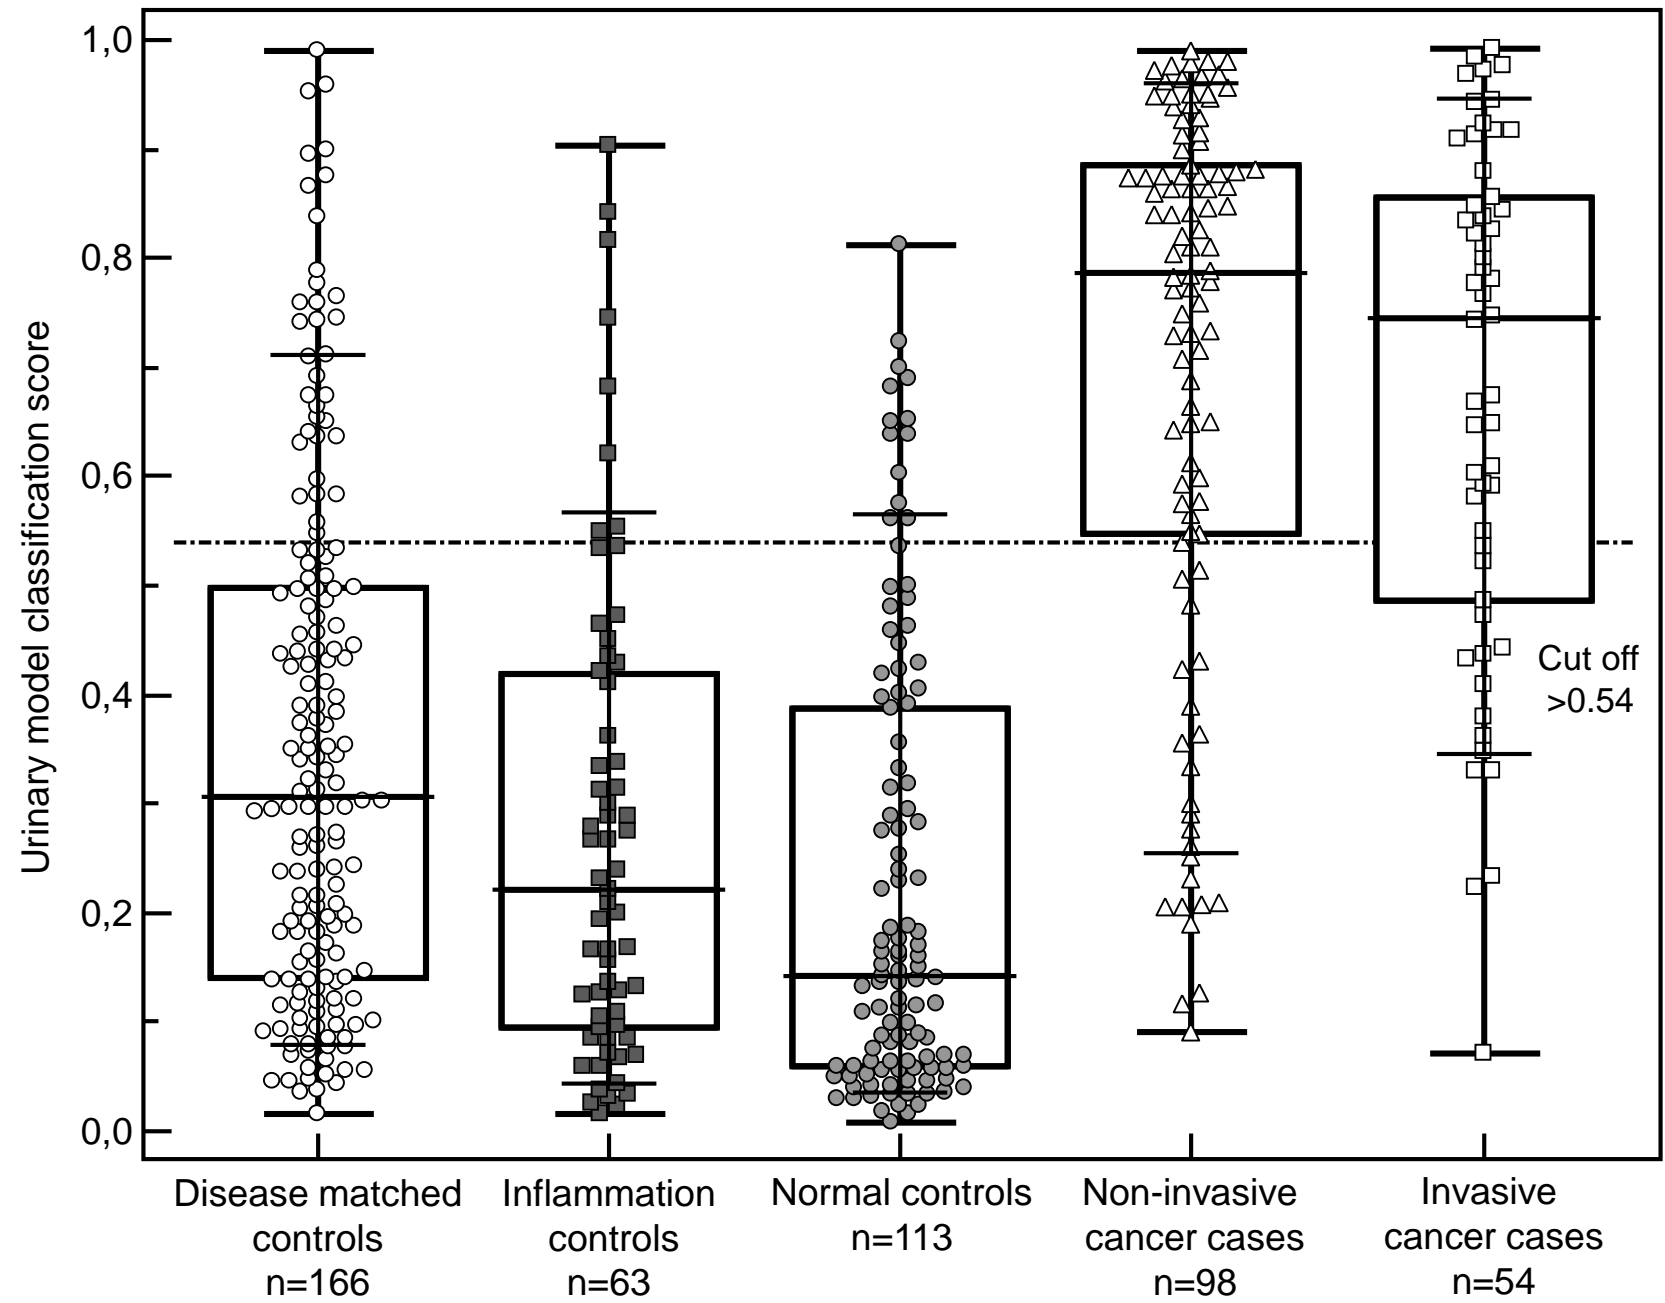

**Supplementary Table S1.** List of the 193 peptides that were included in the peptide biomarker pattern for detecting of solid tumors

| CE-MS characteristics |                         | Protein name                                       | Biomarker panel                      |           |                                         |           |                                                | Statistical analysis |                         |      |
|-----------------------|-------------------------|----------------------------------------------------|--------------------------------------|-----------|-----------------------------------------|-----------|------------------------------------------------|----------------------|-------------------------|------|
| Mass [Da]             | CE Migration time (min) |                                                    | Distribution in cancer cases (n=676) |           | Distribution in cancer controls (n=744) |           | Fold change (Mean Amp cases/Mean Amp controls) | p value I            | p value II (FDR adj. P) | AUC  |
|                       |                         |                                                    | Mean Amp (SD)                        | Frequency | Mean Amp (SD)                           | Frequency |                                                |                      |                         |      |
| 884,32                | 24,72                   | Cadherin-13                                        | 327(879)                             | 69        | 465(1227)                               | 79        | 0,70                                           | 6,62E-04             | 3,57E-03                | 0,56 |
| 928,37                | 35,53                   | Collagen alpha-5(VI) chain                         | 24(151)                              | 34        | 40(92)                                  | 22        | 0,61                                           | 1,11E-03             | 5,25E-03                | 0,55 |
| 949,22                | 34,54                   |                                                    | 314(122)                             | 48        | 649(199)                                | 57        | 0,48                                           | 2,85E-04             | 1,73E-03                | 0,56 |
| 956,45                | 20,35                   | Mucin-12                                           | 76(605)                              | 76        | 124(711)                                | 81        | 0,61                                           | 2,49E-04             | 1,55E-03                | 0,56 |
| 980,29                | 35,64                   |                                                    | 198(159)                             | 49        | 106(121)                                | 35        | 1,86                                           | 7,20E-04             | 3,85E-03                | 0,56 |
| 992,42                | 20,37                   | PHD finger protein 10                              | 12(513)                              | 64        | 29(743)                                 | 74        | 0,42                                           | 2,11E-08             | 1,09E-06                | 0,58 |
| 1007,31               | 35,68                   |                                                    | 111(5529)                            | 66        | 60(3331)                                | 59        | 1,83                                           | 4,15E-04             | 2,39E-03                | 0,56 |
| 1013,37               | 25,06                   | Inositol 1,4,5-trisphosphate receptor type 2       | 2572(2468)                           | 42        | 3345(3203)                              | 63        | 0,77                                           | 1,62E-03             | 7,08E-03                | 0,56 |
| 1060,38               | 38,03                   |                                                    | 46(1132)                             | 86        | 73(1310)                                | 89        | 0,63                                           | 7,36E-03             | 2,36E-02                | 0,54 |
| 1069,48               | 25,33                   | Collagen alpha-1(III) chain                        | 225(71)                              | 16        | 342(130)                                | 33        | 0,66                                           | 1,96E-03             | 8,22E-03                | 0,55 |
| 1075,49               | 20,68                   | Myeloperoxidase                                    | 54(207)                              | 32        | 120(229)                                | 43        | 0,45                                           | 1,66E-08             | 9,89E-07                | 0,59 |
| 1084,43               | 25,18                   | Collagen alpha-1(II) chain                         | 1718(930)                            | 29        | 2327(812)                               | 41        | 0,74                                           | 1,52E-04             | 1,08E-03                | 0,57 |
| 1099,49               | 28,06                   | Sodium/potassium-transporting ATPase subunit gamma | 467(757)                             | 85        | 665(956)                                | 85        | 0,70                                           | 6,06E-07             | 1,34E-05                | 0,59 |
| 1113,47               | 27,24                   | 14-3-3 protein sigma                               | 215(578)                             | 19        | 351(239)                                | 33        | 0,61                                           | 1,20E-09             | 9,06E-08                | 0,61 |
| 1114,48               | 24,04                   | Collagen alpha-1(III) chain                        | 95(530)                              | 48        | 151(703)                                | 56        | 0,63                                           | 2,34E-04             | 1,50E-03                | 0,56 |
| 1115,51               | 21,6                    | Collagen alpha-1(III) chain                        | 162(914)                             | 33        | 130(291)                                | 43        | 1,25                                           | 1,61E-03             | 7,05E-03                | 0,55 |
| 1128,4                | 33,1                    |                                                    | 965(205)                             | 32        | 1545(244)                               | 39        | 0,62                                           | 8,22E-07             | 1,67E-05                | 0,59 |
| 1129,46               | 27,75                   | Collagen alpha-1(VII) chain                        | 180(288)                             | 38        | 254(165)                                | 24        | 0,71                                           | 2,31E-04             | 1,49E-03                | 0,57 |
| 1161,5                | 37,6                    | Collagen alpha-1(XV) chain                         | 66(738)                              | 31        | 35(755)                                 | 41        | 1,86                                           | 6,06E-05             | 5,54E-04                | 0,56 |
| 1178,38               | 20,44                   | GC-rich sequence DNA-binding factor 1              | 73(208)                              | 43        | 112(322)                                | 50        | 0,65                                           | 1,16E-03             | 5,39E-03                | 0,55 |

| CE-MS characteristics |                         | Protein name                              | Biomarker panel                      |           |                                         |           |                                                | Statistical analysis |                         |      |
|-----------------------|-------------------------|-------------------------------------------|--------------------------------------|-----------|-----------------------------------------|-----------|------------------------------------------------|----------------------|-------------------------|------|
| Mass [Da]             | CE Migration time (min) |                                           | Distribution in cancer cases (n=676) |           | Distribution in cancer controls (n=744) |           | Fold change (Mean Amp cases/Mean Amp controls) | p value I            | p value II (FDR adj. P) | AUC  |
|                       |                         |                                           | Mean Amp (SD)                        | Frequency | Mean Amp (SD)                           | Frequency |                                                |                      |                         |      |
| 1181,48               | 36,8                    | Collagen alpha-1(I) chain                 | 66(602)                              | 66        | 106(722)                                | 76        | 0,62                                           | 1,89E-06             | 3,56E-05                | 0,57 |
| 1182,55               | 28,2                    | Collagen alpha-3(IV) chain                | 34(1189)                             | 60        | 52(4461)                                | 67        | 0,65                                           | 1,08E-04             | 8,66E-04                | 0,56 |
| 1208,38               | 45,14                   |                                           | 96(138)                              | 31        | 173(190)                                | 39        | 0,55                                           | 1,26E-03             | 5,80E-03                | 0,55 |
| 1215,44               | 26,94                   |                                           | 290(378)                             | 51        | 465(393)                                | 38        | 0,62                                           | 2,62E-04             | 1,62E-03                | 0,56 |
| 1216,54               | 24,59                   |                                           | 1133(274)                            | 34        | 1495(357)                               | 46        | 0,76                                           | 2,05E-05             | 2,23E-04                | 0,58 |
| 1217,48               | 27,78                   | E3 ubiquitin-protein ligase UBR2          | 128(170)                             | 58        | 248(103)                                | 53        | 0,52                                           | 2,17E-09             | 1,45E-07                | 0,59 |
| 1224,36               | 45,35                   |                                           | 133(1650)                            | 95        | 199(1738)                               | 98        | 0,67                                           | 1,21E-03             | 5,61E-03                | 0,55 |
| 1226,53               | 21,11                   |                                           | 440(1163)                            | 36        | 576(485)                                | 24        | 0,76                                           | 8,60E-04             | 4,35E-03                | 0,56 |
| 1232,52               | 38,06                   | Collagen alpha-1(II) chain                | 98(1239)                             | 52        | 47(1320)                                | 63        | 2,10                                           | 2,64E-05             | 2,79E-04                | 0,56 |
| 1239,43               | 33,58                   | Myb-binding protein 1A                    | 243(868)                             | 50        | 198(594)                                | 33        | 1,23                                           | 1,16E-04             | 9,15E-04                | 0,56 |
| 1245,55               | 21,69                   | Collagen alpha-1(II) chain                | 80(2637)                             | 92        | 111(3084)                               | 96        | 0,72                                           | 4,00E-03             | 1,44E-02                | 0,54 |
| 1250,56               | 28                      | Collagen alpha-1(I) chain                 | 36626(188)                           | 35        | 44802(131)                              | 27        | 0,82                                           | 3,00E-12             | 6,81E-10                | 0,63 |
| 1257,44               | 33,56                   | Heterogeneous nuclear ribonucleoprotein U | 2898(2052)                           | 85        | 3777(1855)                              | 90        | 0,77                                           | 2,45E-03             | 9,75E-03                | 0,56 |
| 1260,56               | 21,9                    | Collagen alpha-1(III) chain               | 291(1227)                            | 88        | 447(1353)                               | 96        | 0,65                                           | 8,75E-06             | 1,18E-04                | 0,58 |
| 1268,53               | 21,43                   | Collagen alpha-3(IV) chain                | 157(1543)                            | 84        | 210(1710)                               | 74        | 0,75                                           | 4,80E-03             | 1,67E-02                | 0,55 |
| 1270,55               | 29,29                   | Collagen alpha-1(I) chain                 | 46(1732)                             | 46        | 77(2522)                                | 61        | 0,60                                           | 1,56E-05             | 1,82E-04                | 0,56 |
| 1283,55               | 27,39                   | Collagen alpha-2(I) chain                 | 69(258)                              | 45        | 99(378)                                 | 56        | 0,70                                           | 9,57E-05             | 7,91E-04                | 0,56 |
| 1286,54               | 29,33                   | Collagen alpha-1(I) chain                 | 36(175)                              | 33        | 59(199)                                 | 43        | 0,61                                           | 9,27E-06             | 1,24E-04                | 0,57 |
| 1287,59               | 21,92                   | Apolipoprotein A-IV                       | 330(342)                             | 50        | 554(468)                                | 68        | 0,60                                           | 1,77E-10             | 2,46E-08                | 0,61 |
| 1304,61               | 22                      | Collagen alpha-1(XXVI) chain              | 120(269)                             | 56        | 198(343)                                | 67        | 0,61                                           | 3,89E-05             | 3,90E-04                | 0,57 |
| 1312,55               | 29,69                   | Titin                                     | 1445(426)                            | 43        | 1939(562)                               | 49        | 0,75                                           | 8,24E-10             | 6,67E-08                | 0,61 |
| 1321,59               | 28,38                   | Collagen alpha-1(I) chain                 | 11305(10867)                         | 86        | 14846(10508)                            | 97        | 0,76                                           | 2,95E-07             | 9,21E-06                | 0,59 |
| 1336,58               | 21,56                   | Collagen alpha-1(IV) chain                | 138(815)                             | 82        | 104(560)                                | 78        | 1,33                                           | 1,09E-03             | 5,19E-03                | 0,55 |
| 1350,57               | 21,29                   |                                           | 22(166)                              | 41        | 64(211)                                 | 49        | 0,35                                           | 8,45E-13             | 2,39E-10                | 0,60 |
| 1350,62               | 27,21                   | Mucin-4                                   | 343(145)                             | 24        | 442(248)                                | 35        | 0,77                                           | 1,07E-07             | 4,32E-06                | 0,60 |

| CE-MS characteristics |                         | Protein name                                         | Biomarker panel                      |           |                                         |           |                                                | Statistical analysis |                         |      |
|-----------------------|-------------------------|------------------------------------------------------|--------------------------------------|-----------|-----------------------------------------|-----------|------------------------------------------------|----------------------|-------------------------|------|
| Mass [Da]             | CE Migration time (min) |                                                      | Distribution in cancer cases (n=676) |           | Distribution in cancer controls (n=744) |           | Fold change (Mean Amp cases/Mean Amp controls) | p value I            | p value II (FDR adj. P) | AUC  |
|                       |                         |                                                      | Mean Amp (SD)                        | Frequency | Mean Amp (SD)                           | Frequency |                                                |                      |                         |      |
| 1351,63               | 38,77                   | Collagen alpha-1(I) chain                            | 238(211)                             | 41        | 148(188)                                | 31        | 1,60                                           | 1,32E-04             | 1,00E-03                | 0,57 |
| 1352,79               | 24,82                   | Mucin-16                                             | 166(9693)                            | 91        | 253(11319)                              | 94        | 0,65                                           | 1,36E-04             | 1,00E-03                | 0,56 |
| 1361,63               | 22,09                   | Sodium/potassium-transporting ATPase subunit alpha-4 | 315(1702)                            | 40        | 465(181)                                | 30        | 0,68                                           | 7,68E-03             | 2,45E-02                | 0,55 |
| 1378,61               | 28,89                   | Collagen alpha-1(I) chain                            | 2716(617)                            | 87        | 3299(494)                               | 80        | 0,82                                           | 3,22E-07             | 9,28E-06                | 0,59 |
| 1383,63               | 38,9                    | Ras and Rab interactor 3                             | 214(4770)                            | 18        | 66(7423)                                | 33        | 3,25                                           | 1,02E-04             | 8,26E-04                | 0,56 |
| 1390,44               | 36,82                   |                                                      | 27064(351)                           | 39        | 34359(468)                              | 49        | 0,79                                           | 7,03E-03             | 2,27E-02                | 0,55 |
| 1396,62               | 26,63                   | Collagen alpha-1(III) chain                          | 75(4293)                             | 69        | 99(6392)                                | 75        | 0,76                                           | 3,72E-04             | 2,16E-03                | 0,56 |
| 1407,64               | 27,55                   | Collagen alpha-1(I) chain                            | 160(205)                             | 48        | 245(277)                                | 57        | 0,66                                           | 6,89E-06             | 9,52E-05                | 0,58 |
| 1408,65               | 39,07                   | Collagen alpha-1(I) chain                            | 636(142)                             | 45        | 437(95)                                 | 30        | 1,46                                           | 1,25E-04             | 9,66E-04                | 0,57 |
| 1417,64               | 20,06                   | Collagen alpha-2(I) chain                            | 688(4625)                            | 92        | 947(4918)                               | 95        | 0,73                                           | 7,34E-05             | 6,50E-04                | 0,57 |
| 1422,53               | 37,7                    | Ankyrin repeat domain 17                             | 599(453)                             | 61        | 897(661)                                | 65        | 0,67                                           | 1,89E-08             | 1,04E-06                | 0,60 |
| 1423,64               | 37,35                   | Fibrinogen alpha chain                               | 130(2759)                            | 54        | 63(1204)                                | 42        | 2,06                                           | 8,98E-08             | 3,91E-06                | 0,58 |
| 1425,59               | 22,34                   |                                                      | 3146(3560)                           | 96        | 3923(3918)                              | 98        | 0,80                                           | 1,63E-04             | 1,14E-03                | 0,57 |
| 1438,67               | 28,06                   | Collagen alpha-1(III) chain                          | 3302(1039)                           | 28        | 4178(3833)                              | 37        | 0,79                                           | 4,49E-07             | 1,08E-05                | 0,59 |
| 1462,61               | 39,5                    | Collagen alpha-3(V) chain                            | 545(828)                             | 69        | 932(819)                                | 81        | 0,58                                           | 1,47E-04             | 1,05E-03                | 0,56 |
| 1485,68               | 23,77                   | Collagen alpha-1(I) chain                            | 1219(1581)                           | 47        | 1492(1670)                              | 61        | 0,82                                           | 3,41E-07             | 9,28E-06                | 0,59 |
| 1495,68               | 39,45                   | Collagen alpha-1(I) chain                            | 104(1443)                            | 55        | 67(1455)                                | 64        | 1,55                                           | 2,67E-03             | 1,04E-02                | 0,55 |
| 1505,61               | 28,85                   | Nuclear receptor corepressor 1                       | 149(1326)                            | 89        | 281(1570)                               | 95        | 0,53                                           | 3,01E-07             | 9,21E-06                | 0,58 |
| 1524,65               | 20,03                   | Collagen alpha-1(XI) chain                           | 455(99)                              | 34        | 606(98)                                 | 43        | 0,75                                           | 5,33E-03             | 1,83E-02                | 0,55 |
| 1525,55               | 21,83                   |                                                      | 190(377)                             | 27        | 306(504)                                | 43        | 0,62                                           | 1,37E-03             | 6,23E-03                | 0,55 |
| 1552,5                | 39,02                   |                                                      | 239(2932)                            | 85        | 300(4090)                               | 89        | 0,80                                           | 2,64E-04             | 1,63E-03                | 0,56 |
| 1560,57               | 21,53                   |                                                      | 100(1163)                            | 33        | 209(1591)                               | 42        | 0,48                                           | 2,32E-05             | 2,48E-04                | 0,56 |
| 1564,72               | 28,29                   | Collagen alpha-1(V) chain                            | 42(1230)                             | 80        | 56(1047)                                | 76        | 0,75                                           | 1,62E-03             | 7,07E-03                | 0,55 |
| 1594,76               | 40,28                   | Collagen alpha-1(I) chain                            | 1372(315)                            | 34        | 1044(167)                               | 22        | 1,31                                           | 4,82E-07             | 1,14E-05                | 0,59 |
| 1610,88               | 30,35                   |                                                      | 1029(356)                            | 72        | 705(243)                                | 61        | 1,46                                           | 3,44E-04             | 2,04E-03                | 0,56 |

| CE-MS characteristics |                         | Protein name                        | Biomarker panel                      |           |                                         |           |                                                | Statistical analysis |                         |      |
|-----------------------|-------------------------|-------------------------------------|--------------------------------------|-----------|-----------------------------------------|-----------|------------------------------------------------|----------------------|-------------------------|------|
| Mass [Da]             | CE Migration time (min) |                                     | Distribution in cancer cases (n=676) |           | Distribution in cancer controls (n=744) |           | Fold change (Mean Amp cases/Mean Amp controls) | p value I            | p value II (FDR adj. P) | AUC  |
|                       |                         |                                     | Mean Amp (SD)                        | Frequency | Mean Amp (SD)                           | Frequency |                                                |                      |                         |      |
| 1620,7                | 22,69                   | Collagen alpha-2(I) chain           | 141(18543)                           | 98        | 225(21590)                              | 99        | 0,63                                           | 6,57E-05             | 5,91E-04                | 0,56 |
| 1640,6                | 23,02                   |                                     | 3567(1376)                           | 78        | 5741(1473)                              | 82        | 0,62                                           | 1,26E-07             | 4,93E-06                | 0,60 |
| 1651,79               | 40,75                   | Collagen alpha-1(I) chain           | 4598(96)                             | 33        | 3442(79)                                | 23        | 1,34                                           | 2,12E-10             | 2,46E-08                | 0,62 |
| 1684,66               | 30,88                   | Collagen alpha-1(I) chain           | 1661(525)                            | 32        | 2980(596)                               | 41        | 0,56                                           | 1,82E-11             | 3,43E-09                | 0,62 |
| 1703,83               | 33,54                   | Collagen alpha-3(V) chain           | 160(1625)                            | 28        | 410(996)                                | 37        | 0,39                                           | 1,66E-05             | 1,90E-04                | 0,57 |
| 1716,65               | 20,16                   |                                     | 234(3672)                            | 71        | 373(4285)                               | 78        | 0,63                                           | 5,26E-03             | 1,81E-02                | 0,55 |
| 1720,69               | 19,64                   |                                     | 54(319)                              | 59        | 106(165)                                | 55        | 0,51                                           | 3,83E-05             | 3,87E-04                | 0,56 |
| 1732,77               | 28,3                    |                                     | 2174(1032)                           | 65        | 2696(1422)                              | 72        | 0,81                                           | 1,69E-04             | 1,16E-03                | 0,57 |
| 1734,66               | 19,83                   |                                     | 77(184)                              | 40        | 129(245)                                | 52        | 0,60                                           | 1,63E-04             | 1,14E-03                | 0,56 |
| 1764,68               | 19,92                   |                                     | 167(137)                             | 31        | 261(162)                                | 40        | 0,64                                           | 7,88E-06             | 1,08E-04                | 0,57 |
| 1767                  | 24,9                    |                                     | 249(470)                             | 69        | 451(651)                                | 83        | 0,55                                           | 6,41E-03             | 2,11E-02                | 0,54 |
| 1767,78               | 19,8                    | Fibrinogen alpha chain              | 227(465)                             | 52        | 137(468)                                | 36        | 1,66                                           | 3,77E-07             | 9,74E-06                | 0,58 |
| 1793,89               | 32,41                   | Fibrinogen beta chain               | 644(1912)                            | 96        | 505(6442)                               | 96        | 1,27                                           | 2,25E-04             | 1,46E-03                | 0,57 |
| 1807,81               | 20,72                   | Collagen alpha-1(I) chain           | 2074(3133)                           | 95        | 2645(3144)                              | 98        | 0,78                                           | 1,32E-02             | 3,70E-02                | 0,55 |
| 1809,87               | 32,43                   | Acyl-protein thioesterase 2         | 265(475)                             | 66        | 163(583)                                | 71        | 1,62                                           | 5,87E-06             | 8,52E-05                | 0,57 |
| 1817,7                | 20,25                   | Stabilin-2                          | 2637(368)                            | 42        | 3950(503)                               | 51        | 0,67                                           | 3,78E-07             | 9,74E-06                | 0,59 |
| 1828,85               | 21,21                   | Collagen alpha-1(I) chain           | 165(4898)                            | 30        | 107(5118)                               | 44        | 1,54                                           | 1,81E-02             | 4,76E-02                | 0,54 |
| 1835,71               | 19,87                   |                                     | 663(262)                             | 41        | 1049(330)                               | 50        | 0,63                                           | 3,87E-07             | 9,74E-06                | 0,59 |
| 1858,84               | 24,34                   | Prostaglandin-H2 D-isomerase        | 157(34)                              | 18        | 304(61)                                 | 33        | 0,52                                           | 1,05E-05             | 1,36E-04                | 0,57 |
| 1878,59               | 31,17                   |                                     | 695(557)                             | 29        | 904(1516)                               | 40        | 0,77                                           | 1,41E-04             | 1,02E-03                | 0,57 |
| 1885,87               | 21,25                   | Collagen alpha-1(I) chain           | 88(1150)                             | 50        | 53(1250)                                | 58        | 1,66                                           | 1,11E-02             | 3,25E-02                | 0,54 |
| 1889,86               | 33,19                   | Collagen alpha-2(IV) chain          | 142(7725)                            | 35        | 69(6887)                                | 24        | 2,05                                           | 1,12E-05             | 1,41E-04                | 0,57 |
| 1892,87               | 22,13                   | Collagen alpha-1(I) chain           | 599(484)                             | 51        | 454(555)                                | 60        | 1,32                                           | 3,25E-04             | 1,95E-03                | 0,57 |
| 1893,04               | 29,05                   | 26S protease regulatory subunit 10B | 184(1141)                            | 67        | 263(913)                                | 62        | 0,70                                           | 6,42E-06             | 9,10E-05                | 0,58 |
| 1899,81               | 22,44                   |                                     | 80(2404)                             | 46        | 106(1816)                               | 32        | 0,75                                           | 6,20E-05             | 5,62E-04                | 0,56 |



| CE-MS characteristics |                         | Protein name                       | Biomarker panel                      |           |                                         |           |                                                | Statistical analysis |                         |      |
|-----------------------|-------------------------|------------------------------------|--------------------------------------|-----------|-----------------------------------------|-----------|------------------------------------------------|----------------------|-------------------------|------|
| Mass [Da]             | CE Migration time (min) |                                    | Distribution in cancer cases (n=676) |           | Distribution in cancer controls (n=744) |           | Fold change (Mean Amp cases/Mean Amp controls) | p value I            | p value II (FDR adj. P) | AUC  |
|                       |                         |                                    | Mean Amp (SD)                        | Frequency | Mean Amp (SD)                           | Frequency |                                                |                      |                         |      |
| 1911,05               | 25,23                   | Metastasis suppressor protein 1    | 79331(1478)                          | 73        | 103725(1000)                            | 68        | 0,76                                           | 1,08E-05             | 1,38E-04                | 0,58 |
| 1915                  | 33,62                   |                                    | 83(449)                              | 36        | 49(263)                                 | 24        | 1,70                                           | 3,08E-03             | 1,17E-02                | 0,55 |
| 1916,78               | 20,22                   |                                    | 1155(8075)                           | 89        | 1608(7772)                              | 91        | 0,72                                           | 6,67E-05             | 5,95E-04                | 0,57 |
| 1933,88               | 21,64                   | Collagen alpha-1(I) chain          | 964(677)                             | 67        | 752(780)                                | 75        | 1,28                                           | 5,41E-03             | 1,83E-02                | 0,55 |
| 1934,79               | 19,91                   | Keratin-1                          | 340(108)                             | 25        | 534(138)                                | 35        | 0,64                                           | 2,47E-06             | 4,49E-05                | 0,58 |
| 1945                  | 33,66                   | Glycogen phosphorylase, brain form | 288(112)                             | 39        | 214(97)                                 | 29        | 1,34                                           | 1,10E-03             | 5,21E-03                | 0,56 |
| 1991,94               | 22,05                   | Collagen alpha-1(III) chain        | 1815(368)                            | 41        | 1021(287)                               | 27        | 1,78                                           | 5,22E-06             | 7,97E-05                | 0,58 |
| 1996,78               | 20,96                   |                                    | 519(269)                             | 24        | 842(389)                                | 34        | 0,62                                           | 1,29E-09             | 9,12E-08                | 0,61 |
| 2064,92               | 24,43                   | Collagen alpha-1(II) chain         | 730(244)                             | 31        | 549(221)                                | 41        | 1,33                                           | 5,14E-05             | 4,89E-04                | 0,57 |
| 2067,82               | 20,6                    | Microtubule-associated protein tau | 1088(2169)                           | 25        | 1491(2375)                              | 35        | 0,73                                           | 7,42E-04             | 3,88E-03                | 0,56 |
| 2093,93               | 33,71                   | Collagen alpha-2(I) chain          | 302(243)                             | 37        | 167(274)                                | 26        | 1,80                                           | 2,35E-07             | 7,90E-06                | 0,59 |
| 2103,96               | 33,08                   | Collagen alpha-1(I) chain          | 2759(872)                            | 37        | 2308(488)                               | 26        | 1,20                                           | 1,05E-03             | 5,08E-03                | 0,56 |
| 2145,93               | 48,5                    | Nidogen-2                          | 10877(299)                           | 38        | 18165(289)                              | 29        | 0,60                                           | 2,61E-10             | 2,46E-08                | 0,61 |
| 2152,97               | 32,92                   |                                    | 66(770)                              | 29        | 35(1771)                                | 39        | 1,89                                           | 1,63E-05             | 1,88E-04                | 0,57 |
| 2170,97               | 27,53                   | Collagen alpha-1(I) chain          | 277(121)                             | 43        | 400(129)                                | 53        | 0,69                                           | 1,45E-05             | 1,75E-04                | 0,57 |
| 2184,57               | 35,06                   |                                    | 362(278)                             | 40        | 552(254)                                | 31        | 0,66                                           | 3,38E-08             | 1,63E-06                | 0,60 |
| 2187,96               | 39,54                   | Mucin-12                           | 1465(103)                            | 29        | 1980(135)                               | 49        | 0,74                                           | 9,49E-04             | 4,70E-03                | 0,56 |
| 2199                  | 22,33                   | Collagen alpha-1(I) chain          | 104(592)                             | 68        | 298(859)                                | 79        | 0,35                                           | 4,69E-03             | 1,64E-02                | 0,54 |
| 2264,94               | 43,13                   | Collagen alpha-2(IV) chain         | 238(690)                             | 31        | 94(845)                                 | 43        | 2,54                                           | 4,96E-04             | 2,78E-03                | 0,55 |
| 2272,24               | 23,91                   | Histone deacetylase 6              | 227(816)                             | 42        | 131(946)                                | 52        | 1,73                                           | 2,68E-06             | 4,75E-05                | 0,58 |
| 2306,04               | 19,52                   | Fibrinogen alpha chain             | 1194(322)                            | 23        | 313(304)                                | 33        | 3,82                                           | 2,26E-06             | 4,20E-05                | 0,57 |
| 2321,19               | 22,06                   | Fibrinogen beta chain              | 378(2271)                            | 41        | 195(1725)                               | 51        | 1,94                                           | 1,03E-07             | 4,31E-06                | 0,59 |
| 2356,66               | 35,6                    |                                    | 485(2078)                            | 90        | 609(2567)                               | 90        | 0,80                                           | 1,31E-04             | 9,93E-04                | 0,57 |
| 2479,06               | 47,73                   | Mucin-22                           | 727(134)                             | 26        | 1281(257)                               | 40        | 0,57                                           | 8,06E-09             | 5,07E-07                | 0,60 |

| CE-MS characteristics |                         | Protein name                             | Biomarker panel                      |           |                                         |           |                                                | Statistical analysis |                         |      |
|-----------------------|-------------------------|------------------------------------------|--------------------------------------|-----------|-----------------------------------------|-----------|------------------------------------------------|----------------------|-------------------------|------|
| Mass [Da]             | CE Migration time (min) |                                          | Distribution in cancer cases (n=676) |           | Distribution in cancer controls (n=744) |           | Fold change (Mean Amp cases/Mean Amp controls) | p value I            | p value II (FDR adj. P) | AUC  |
|                       |                         |                                          | Mean Amp (SD)                        | Frequency | Mean Amp (SD)                           | Frequency |                                                |                      |                         |      |
| 2548                  | 21,36                   |                                          | 282(686)                             | 68        | 376(859)                                | 76        | 0,75                                           | 8,55E-04             | 4,35E-03                | 0,56 |
| 2565,15               | 23,6                    | Collagen alpha-1(XVII) chain             | 248(492)                             | 51        | 188(377)                                | 43        | 1,32                                           | 6,42E-04             | 3,50E-03                | 0,55 |
| 2583,2                | 28,3                    | Collagen alpha-1(I) chain                | 790(3794)                            | 62        | 588(2369)                               | 54        | 1,34                                           | 1,82E-04             | 1,21E-03                | 0,57 |
| 2600,23               | 35,2                    | Collagen alpha-1(I) chain                | 44(364)                              | 61        | 27(307)                                 | 49        | 1,62                                           | 1,57E-03             | 6,96E-03                | 0,55 |
| 2647,21               | 23,52                   | Collagen alpha-1(III) chain              | 94(182)                              | 41        | 51(171)                                 | 32        | 1,84                                           | 1,95E-05             | 2,14E-04                | 0,57 |
| 2663,21               | 23,57                   | Collagen alpha-1(III) chain              | 934(203)                             | 45        | 652(407)                                | 37        | 1,43                                           | 1,45E-07             | 5,49E-06                | 0,60 |
| 2734,29               | 27,99                   |                                          | 121(1321)                            | 80        | 67(1165)                                | 71        | 1,80                                           | 1,18E-03             | 5,49E-03                | 0,55 |
| 2739,23               | 28,46                   | Chloride intracellular channel protein 6 | 145(180)                             | 46        | 108(106)                                | 35        | 1,34                                           | 1,65E-03             | 7,13E-03                | 0,56 |
| 2751,34               | 29,11                   |                                          | 238(386)                             | 55        | 309(561)                                | 60        | 0,77                                           | 8,83E-04             | 4,45E-03                | 0,56 |
| 2808,3                | 24,33                   |                                          | 444(7276)                            | 73        | 230(6286)                               | 81        | 1,93                                           | 4,57E-06             | 7,50E-05                | 0,57 |
| 2834,19               | 22,35                   |                                          | 44(96)                               | 23        | 104(98)                                 | 32        | 0,43                                           | 1,15E-10             | 1,86E-08                | 0,60 |
| 2854,37               | 34,67                   | Collagen alpha-1(III) chain              | 3628(1093)                           | 41        | 4551(1197)                              | 28        | 0,80                                           | 9,64E-05             | 7,91E-04                | 0,57 |
| 2861,29               | 48,8                    | Protein transport protein Sec31A         | 531(218)                             | 34        | 852(127)                                | 24        | 0,62                                           | 2,11E-07             | 7,47E-06                | 0,59 |
| 2887,35               | 35,57                   | Collagen alpha-2(V) chain                | 283(408)                             | 68        | 198(326)                                | 61        | 1,43                                           | 4,45E-03             | 1,57E-02                | 0,55 |
| 2903,35               | 35,64                   | Collagen alpha-2(I) chain                | 68(319)                              | 54        | 36(334)                                 | 43        | 1,88                                           | 2,76E-05             | 2,86E-04                | 0,57 |
| 2907,35               | 35,85                   | Collagen alpha-2(I) chain                | 287(836)                             | 76        | 174(785)                                | 71        | 1,65                                           | 3,17E-06             | 5,51E-05                | 0,58 |
| 2946,2                | 35,07                   |                                          | 86(963)                              | 64        | 50(682)                                 | 53        | 1,72                                           | 4,14E-05             | 4,04E-04                | 0,57 |
| 2959,36               | 48,32                   | Collagen alpha-1(III) chain              | 169(78)                              | 26        | 277(99)                                 | 37        | 0,61                                           | 2,92E-05             | 3,00E-04                | 0,56 |
| 2973,46               | 24,38                   | Collagen alpha-1(I) chain                | 571(353)                             | 54        | 367(304)                                | 42        | 1,55                                           | 2,19E-05             | 2,36E-04                | 0,58 |
| 2989,44               | 24,47                   | Collagen alpha-1(I) chain                | 310(695)                             | 40        | 165(658)                                | 27        | 1,88                                           | 2,49E-06             | 4,49E-05                | 0,58 |
| 2999,3                | 22,24                   | Collagen alpha-1(I) chain                | 2498(396)                            | 49        | 1860(438)                               | 57        | 1,34                                           | 1,60E-03             | 7,05E-03                | 0,56 |
| 3017,4                | 48,54                   | Collagen alpha-2(V) chain                | 1590(453)                            | 63        | 2399(611)                               | 76        | 0,66                                           | 5,39E-06             | 8,04E-05                | 0,57 |
| 3021,38               | 23,21                   | Collagen alpha-1(XI) chain               | 983(236)                             | 42        | 1200(146)                               | 34        | 0,82                                           | 9,29E-03             | 2,81E-02                | 0,55 |
| 3023,41               | 20,91                   | Collagen alpha-1(III) chain              | 224(102)                             | 26        | 163(181)                                | 44        | 1,37                                           | 3,51E-04             | 2,06E-03                | 0,56 |
| 3025,4                | 29,89                   | Collagen alpha-2(I) chain                | 144(13665)                           | 80        | 94(15637)                               | 81        | 1,53                                           | 1,22E-04             | 9,46E-04                | 0,57 |

| CE-MS characteristics |                         | Protein name                                 | Biomarker panel                      |           |                                         |           | Statistical analysis                           |           |                         |      |
|-----------------------|-------------------------|----------------------------------------------|--------------------------------------|-----------|-----------------------------------------|-----------|------------------------------------------------|-----------|-------------------------|------|
| Mass [Da]             | CE Migration time (min) |                                              | Distribution in cancer cases (n=676) |           | Distribution in cancer controls (n=744) |           | Fold change (Mean Amp cases/Mean Amp controls) | p value I | p value II (FDR adj. P) | AUC  |
|                       |                         |                                              | Mean Amp (SD)                        | Frequency | Mean Amp (SD)                           | Frequency |                                                |           |                         |      |
| 3031,44               | 35,84                   | Collagen alpha-1(I) chain                    | 248(1185)                            | 72        | 186(4564)                               | 64        | 1,34                                           | 9,92E-04  | 4,83E-03                | 0,56 |
| 3039,39               | 24,6                    | Collagen alpha-2(IV) chain                   | 68(1485)                             | 36        | 49(1729)                                | 52        | 1,40                                           | 3,54E-03  | 1,31E-02                | 0,54 |
| 3057,39               | 29,96                   | Collagen alpha-2(V) chain                    | 103(778)                             | 40        | 76(539)                                 | 27        | 1,36                                           | 5,69E-03  | 1,89E-02                | 0,54 |
| 3091,46               | 28,24                   |                                              | 399(192)                             | 39        | 545(170)                                | 30        | 0,73                                           | 3,58E-03  | 1,32E-02                | 0,55 |
| 3092,44               | 36,22                   | Collagen alpha-2(I) chain                    | 258(2752)                            | 97        | 193(2528)                               | 95        | 1,34                                           | 8,74E-03  | 2,70E-02                | 0,55 |
| 3158,42               | 29,8                    | Collagen alpha-1(XI) chain                   | 1166(1104)                           | 36        | 842(694)                                | 26        | 1,38                                           | 2,99E-03  | 1,15E-02                | 0,55 |
| 3168,37               | 24,55                   | Collagen alpha-1(III) chain                  | 689(551)                             | 44        | 507(1271)                               | 33        | 1,36                                           | 7,42E-04  | 3,88E-03                | 0,56 |
| 3184,36               | 24,71                   | Collagen alpha-1(V) chain                    | 252(3006)                            | 64        | 141(2555)                               | 56        | 1,78                                           | 6,75E-10  | 5,89E-08                | 0,60 |
| 3194,43               | 30,28                   | Collagen alpha-1(III) chain                  | 146(2336)                            | 65        | 76(2458)                                | 72        | 1,92                                           | 1,07E-05  | 1,38E-04                | 0,56 |
| 3261,53               | 22,19                   |                                              | 183(3569)                            | 88        | 132(4092)                               | 92        | 1,39                                           | 1,68E-05  | 1,90E-04                | 0,57 |
| 3265,44               | 35,9                    | Collagen alpha-1(XI) chain                   | 671(419)                             | 33        | 368(224)                                | 22        | 1,82                                           | 6,88E-08  | 3,12E-06                | 0,59 |
| 3281,43               | 35,96                   | Collagen alpha-1(XI) chain                   | 2373(18908)                          | 68        | 1798(6722)                              | 58        | 1,32                                           | 5,14E-06  | 7,97E-05                | 0,58 |
| 3288,52               | 36,49                   | Receptor-type tyrosine-protein phosphatase U | 103(284)                             | 40        | 58(183)                                 | 30        | 1,76                                           | 1,83E-05  | 2,03E-04                | 0,57 |
| 3290,54               | 23,89                   | Collagen alpha-2(V) chain                    | 474(9987)                            | 92        | 651(10436)                              | 95        | 0,73                                           | 1,66E-02  | 4,41E-02                | 0,54 |
| 3298,46               | 35,95                   | Collagen alpha-1(I) chain                    | 358(131)                             | 39        | 177(133)                                | 27        | 2,03                                           | 1,82E-07  | 6,66E-06                | 0,58 |
| 3313,54               | 25,62                   | Collagen alpha-2(I) chain                    | 129(354)                             | 42        | 75(306)                                 | 28        | 1,72                                           | 7,30E-04  | 3,88E-03                | 0,55 |
| 3318,52               | 30,97                   | Collagen alpha-1(I) chain                    | 121(969)                             | 85        | 90(760)                                 | 80        | 1,34                                           | 1,64E-02  | 4,38E-02                | 0,54 |
| 3356,52               | 25,46                   | Collagen alpha-1(I) chain                    | 187(305)                             | 36        | 101(141)                                | 25        | 1,86                                           | 8,27E-07  | 1,67E-05                | 0,58 |
| 3385,59               | 25,54                   |                                              | 2618(680)                            | 40        | 1972(974)                               | 30        | 1,33                                           | 1,89E-03  | 7,97E-03                | 0,56 |
| 3401,61               | 25,47                   | Collagen alpha-1(V) chain                    | 1275(1454)                           | 55        | 972(3379)                               | 68        | 1,31                                           | 9,23E-05  | 7,80E-04                | 0,57 |
| 3439,59               | 38,9                    | Collagen alpha-1(XII) chain                  | 117(394)                             | 62        | 97(250)                                 | 50        | 1,21                                           | 1,16E-03  | 5,39E-03                | 0,55 |
| 3489,58               | 31,42                   |                                              | 591(5387)                            | 41        | 489(1139)                               | 28        | 1,21                                           | 1,23E-02  | 3,49E-02                | 0,54 |
| 3546,67               | 26,15                   |                                              | 173(450)                             | 61        | 72(653)                                 | 66        | 2,40                                           | 6,19E-07  | 1,34E-05                | 0,57 |
| 3582,75               | 19,46                   |                                              | 2313(218)                            | 52        | 1469(151)                               | 44        | 1,57                                           | 8,22E-05  | 7,02E-04                | 0,57 |
| 3583,63               | 26,32                   | Collagen alpha-1(III) chain                  | 111(167)                             | 43        | 76(134)                                 | 34        | 1,47                                           | 6,82E-06  | 9,52E-05                | 0,57 |

| CE-MS characteristics |                         | Protein name                | Biomarker panel                      |           |                                         |           | Statistical analysis                           |           |                         |      |
|-----------------------|-------------------------|-----------------------------|--------------------------------------|-----------|-----------------------------------------|-----------|------------------------------------------------|-----------|-------------------------|------|
| Mass [Da]             | CE Migration time (min) |                             | Distribution in cancer cases (n=676) |           | Distribution in cancer controls (n=744) |           | Fold change (Mean Amp cases/Mean Amp controls) | p value I | p value II (FDR adj. P) | AUC  |
|                       |                         |                             | Mean Amp (SD)                        | Frequency | Mean Amp (SD)                           | Frequency |                                                |           |                         |      |
| 3593,47               | 20,19                   | Collagen alpha-1(XI) chain  | 229(1825)                            | 28        | 307(1087)                               | 40        | 0,75                                           | 6,43E-04  | 3,50E-03                | 0,55 |
| 3618,67               | 31,67                   | Collagen alpha-1(I) chain   | 110(256)                             | 67        | 58(240)                                 | 60        | 1,89                                           | 3,25E-04  | 1,95E-03                | 0,55 |
| 3681,71               | 31,87                   |                             | 92(2612)                             | 84        | 60(2064)                                | 81        | 1,52                                           | 1,50E-03  | 6,72E-03                | 0,55 |
| 3710,76               | 19,57                   | Collagen alpha-1(XVI) chain | 245(2211)                            | 87        | 142(1970)                               | 88        | 1,72                                           | 1,11E-04  | 8,80E-04                | 0,56 |
| 3822,11               | 24,81                   |                             | 201(1957)                            | 83        | 352(2359)                               | 89        | 0,57                                           | 2,16E-03  | 8,72E-03                | 0,55 |
| 3943,83               | 33,54                   | Collagen alpha-1(III) chain | 214(12290)                           | 59        | 170(10387)                              | 76        | 1,25                                           | 3,30E-03  | 1,23E-02                | 0,55 |
| 3968,63               | 21,07                   |                             | 1481(3676)                           | 91        | 1938(3036)                              | 91        | 0,76                                           | 1,23E-05  | 1,50E-04                | 0,58 |
| 4043,65               | 20,16                   |                             | 753(575)                             | 26        | 933(1150)                               | 38        | 0,81                                           | 4,13E-05  | 4,04E-04                | 0,57 |
| 4059,65               | 20,38                   |                             | 243(2442)                            | 34        | 111(2812)                               | 22        | 2,20                                           | 5,08E-06  | 7,97E-05                | 0,56 |
| 4078,81               | 33,06                   | Collagen alpha-3(IV) chain  | 246(491)                             | 55        | 123(317)                                | 41        | 2,00                                           | 5,95E-07  | 1,34E-05                | 0,58 |
| 4185,91               | 33,6                    |                             | 67(194)                              | 61        | 50(156)                                 | 54        | 1,34                                           | 1,53E-04  | 1,08E-03                | 0,56 |
| 4196,78               | 20,85                   |                             | 182(215)                             | 29        | 234(287)                                | 38        | 0,78                                           | 3,49E-04  | 2,06E-03                | 0,56 |
| 4368,87               | 20,21                   | Collagen alpha-1(XI) chain  | 1140(2340)                           | 36        | 521(2120)                               | 22        | 2,19                                           | 1,18E-05  | 1,46E-04                | 0,57 |
| 4404,87               | 20,59                   |                             | 643(299)                             | 29        | 859(416)                                | 40        | 0,75                                           | 7,54E-05  | 6,59E-04                | 0,57 |
| 4654,14               | 25,78                   | Collagen alpha-1(III) chain | 3018(527)                            | 35        | 2253(416)                               | 24        | 1,34                                           | 5,42E-03  | 1,83E-02                | 0,55 |
| 4817,17               | 23,74                   | Collagen alpha-1(II) chain  | 847(759)                             | 32        | 431(372)                                | 17        | 1,96                                           | 1,02E-05  | 1,35E-04                | 0,56 |
| 4833,16               | 23,83                   | Collagen alpha-1(I) chain   | 794(849)                             | 60        | 436(962)                                | 48        | 1,82                                           | 4,63E-06  | 7,50E-05                | 0,57 |
| 4960,48               | 20,57                   | Collagen alpha-1(II) chain  | 4215(392)                            | 39        | 2056(420)                               | 46        | 2,05                                           | 5,69E-03  | 1,89E-02                | 0,54 |
| 5510,35               | 26,99                   |                             | 336(557)                             | 59        | 520(686)                                | 72        | 0,65                                           | 1,53E-05  | 1,80E-04                | 0,58 |
| 6211,71               | 20,26                   |                             | 256(4180)                            | 76        | 443(4643)                               | 84        | 0,58                                           | 7,03E-07  | 1,47E-05                | 0,58 |
| 6236,85               | 21,06                   |                             | 4582(183)                            | 47        | 2598(165)                               | 40        | 1,76                                           | 6,20E-07  | 1,34E-05                | 0,59 |
| 9866,38               | 20,83                   |                             | 2139(1199)                           | 79        | 2699(1688)                              | 74        | 0,79                                           | 5,95E-05  | 5,48E-04                | 0,57 |
| 9882,83               | 20,82                   |                             | 382(40282)                           | 78        | 147(26267)                              | 69        | 2,60                                           | 2,37E-07  | 7,90E-06                | 0,57 |
| 10999,63              | 21,33                   |                             | 913(81)                              | 27        | 1426(108)                               | 36        | 0,64                                           | 3,16E-07  | 9,28E-06                | 0,57 |

\* Abbreviations: Amp, amplitude; CE-MS, Capillary Electrophoresis coupled to Mass Spectrometry; Da, Dalton; min, minutes; SD: Standard deviation; FDR adj., False Discovery Rate adjustment.

**Supplementary Table S2.** Investigation of the distribution of the 193 peptide markers in individual cancers. Statistical analyses were performed in the discovery set using the Wilcoxon rank sum test for each cancer group separately, followed by adjustment using Benjamini-Hochberg method. Each analysis was repeated ten times by excluding randomly 30% of the samples in both groups and applying the frequency threshold of 70% (at least in one group). The results of the analysis are presented in the table. Adjusted p-values of the Wilcoxon rank sum test are reported. Non-significant peptides are reported as n.s. N/A denotes peptides that were not commonly detected in all 10 permutations with at least 70% frequency. Peptides that were observed as statistically significant in the discovery set of one cancer type (adj. p-value highlighted in red) were considered for further analysis in the validation set (unadjusted p-values of Wilcoxon rank sum test are reported). Only those peptides that were observed as statistically significant in both discovery and validation sets are considered as cancer-type specific peptides (17 peptides highlighted in grey color).

| 193-peptide marker pattern |                         |                                                      | Bladder cancer |                            |                |                            | Prostate cancer |                            |                |                            | Cholangiocarcinoma |                            |                |                            | Pancreatic cancer |                            |                |                            | Renal cell carcinoma |                            |                |                            |
|----------------------------|-------------------------|------------------------------------------------------|----------------|----------------------------|----------------|----------------------------|-----------------|----------------------------|----------------|----------------------------|--------------------|----------------------------|----------------|----------------------------|-------------------|----------------------------|----------------|----------------------------|----------------------|----------------------------|----------------|----------------------------|
| Mass [Da]                  | CE migration time [min] | Protein name                                         | Discovery set  |                            | Validation set |                            | Discovery set   |                            | Validation set |                            | Discovery set      |                            | Validation set |                            | Discovery set     |                            | Validation set |                            | Discovery set        |                            | Validation set |                            |
|                            |                         |                                                      | adj. P-value   | Fold change (case/control) | unadj. P-value | Fold change (case/control) | adj. P-value    | Fold change (case/control) | unadj. P-value | Fold change (case/control) | adj. P-value       | Fold change (case/control) | unadj. P-value | Fold change (case/control) | adj. P-value      | Fold change (case/control) | unadj. P-value | Fold change (case/control) | adj. P-value         | Fold change (case/control) | unadj. P-value | Fold change (case/control) |
| 1129,46                    | 27,75                   | Collagen alpha-1(VII) chain                          | N/A            | 0,71                       | 1,88           | 0,03                       | 0,68            | 0,01                       | 0,70           | N/A                        | 1,84               |                            | 1,38           | N/A                        | 0,48              |                            | 1,48           | N/A                        | 0,59                 |                            | 0,35           |                            |
| 1878,59                    | 31,17                   |                                                      | N/A            | 0,44                       | 1,69           | 0,02                       | 0,82            | 0,02                       | 0,74           | N/A                        | 0,41               |                            | 0,34           | N/A                        | 0,29              |                            | 0,32           | N/A                        | 0,42                 |                            | 0,56           |                            |
| 2184,57                    | 35,06                   |                                                      | N/A            | 0,62                       | 0,78           | 0,04                       | 0,74            | 0,03                       | 0,76           | N/A                        | 0,40               |                            | 0,56           | N/A                        | 0,40              |                            | 1,06           | N/A                        | 0,57                 |                            | 0,78           |                            |
| 2103,96                    | 33,08                   | Collagen alpha-1(I) chain                            | n.s.           | 0,92                       | 1,11           | 0,00                       | 1,21            | 0,02                       | 1,25           | n.s.                       | 1,18               |                            | 1,22           | n.s.                       | 1,21              |                            | 1,02           | n.s.                       | 1,26                 |                            | 1,35           |                            |
| 1099,49                    | 28,06                   | Sodium/potassium-transporting ATPase subunit gamma   | N/A            | 1,16                       | 1,40           | 0,01                       | 0,75            | 0,00                       | 0,69           | n.s.                       | 1,39               |                            | 1,04           | n.s.                       | 0,81              |                            | 1,53           | n.s.                       | 0,68                 |                            | 0,62           |                            |
| 1417,64                    | 20,06                   | Collagen alpha-2(I) chain                            | n.s.           | 1,03                       | 1,49           | n.s.                       | 0,87            | 0,91                       | 0,91           | 0,01                       | 0,56               | 0,01                       | 0,62           | n.s.                       | 0,80              |                            | 0,83           | n.s.                       | 0,70                 |                            | 0,28           |                            |
| 1640,60                    | 23,02                   |                                                      | N/A            | 0,59                       | 0,69           | n.s.                       | 1,19            | 1,06                       | 1,06           | 0,01                       | 0,70               | 0,00                       | 0,36           | n.s.                       | 0,59              |                            | 1,18           | N/A                        | 0,57                 |                            | 0,37           |                            |
| 1807,81                    | 20,72                   | Collagen alpha-1(I) chain                            | n.s.           | 0,85                       | 0,71           | n.s.                       | 0,86            | 0,71                       | 0,80           | 0,01                       | 0,71               | 0,02                       | 0,82           | n.s.                       | 0,59              |                            | 0,56           | n.s.                       | 0,80                 |                            | 0,52           |                            |
| 1835,71                    | 19,87                   |                                                      | N/A            | 0,84                       | 0,80           | N/A                        | 0,87            | 0,69                       | 0,69           | 0,00                       | 0,61               | 0,00                       | 0,27           | N/A                        | 0,83              |                            | 1,58           | n.s.                       | 0,55                 |                            | 0,18           |                            |
| 1934,79                    | 19,91                   | Keratin-1                                            | N/A            | 1,14                       | 0,72           | N/A                        | 0,88            | 0,63                       | 0,72           | 0,00                       | 0,47               | 0,00                       | 0,24           | N/A                        | 1,28              |                            | 1,81           | N/A                        | 0,59                 |                            | 0,24           |                            |
| 1916,78                    | 20,22                   |                                                      | n.s.           | 0,87                       | 0,80           | n.s.                       | 0,73            | 0,80                       | 0,80           | 0,00                       | 0,56               | 0,00                       | 0,27           | N/A                        | 1,13              |                            | 1,68           | n.s.                       | 0,87                 |                            | 0,40           |                            |
| 2067,82                    | 20,60                   | Microtubule-associated protein tau                   | n.s.           | 1,01                       | 0,84           | n.s.                       | 0,91            | 0,79                       | 0,79           | 0,01                       | 0,60               | 0,00                       | 0,28           | n.s.                       | 1,21              |                            | 1,34           | n.s.                       | 0,76                 |                            | 0,40           |                            |
| 2145,93                    | 48,50                   | Nidogen-2                                            | N/A            | 0,25                       | 1,23           | N/A                        | 0,81            | 1,00                       | 1,00           | 0,00                       | 0,53               | 0,02                       | 0,69           | n.s.                       | 0,74              |                            | 0,37           | N/A                        | 0,48                 |                            | 0,26           |                            |
| 9866,38                    | 20,83                   |                                                      | n.s.           | 0,69                       | 0,40           | n.s.                       | 1,13            | 1,18                       | 1,18           | 0,00                       | 0,39               | 0,02                       | 0,60           | n.s.                       | 0,66              |                            | 0,67           | n.s.                       | 1,07                 |                            | 0,39           |                            |
| 3968,63                    | 21,07                   |                                                      | N/A            | 0,78                       | 0,41           | N/A                        | 1,27            | 1,27                       | 1,27           | 0,01                       | 0,70               | 0,00                       | 0,37           | N/A                        | 1,16              |                            | 1,47           | N/A                        | 0,67                 |                            | 0,65           |                            |
| 1361,63                    | 22,09                   | Sodium/potassium-transporting ATPase subunit alpha-4 | N/A            | 1,12                       | 1,26           | N/A                        | 1,19            | 1,24                       | 1,24           | 0,03                       | 0,63               | 0,00                       | 0,43           | n.s.                       | 0,55              |                            | 1,06           | N/A                        | 0,70                 |                            | 0,41           |                            |
| 3168,37                    | 24,55                   | Collagen alpha-1(III) chain                          | n.s.           | 2,01                       | 1,39           | n.s.                       | 1,37            | 1,45                       | 1,45           | n.s.                       | 1,07               |                            | 1,73           | n.s.                       | 1,18              |                            | 1,04           | 0,02                       | 2,25                 | 0,04                       | 2,35           |                            |
| 884,32                     | 24,72                   | Cadherin-13                                          | N/A            | 1,35                       | 1,71           | 0,01                       | 0,54            | 0,99                       | 0,99           | n.s.                       | 2,59               |                            | 2,75           | N/A                        | 0,71              |                            | 1,38           | n.s.                       | 1,33                 |                            | 0,65           |                            |
| 1084,43                    | 25,18                   | Collagen alpha-1(II) chain                           | n.s.           | 0,96                       | 0,95           | 0,01                       | 0,69            | 0,79                       | 0,79           | n.s.                       | 1,28               |                            | 1,29           | n.s.                       | 0,62              |                            | 1,16           | n.s.                       | 0,85                 |                            | 0,45           |                            |
| 1113,47                    | 27,24                   | 14-3-3 protein sigma                                 | N/A            | 0,56                       | 1,31           | 0,02                       | 0,70            | 0,77                       | 0,77           | N/A                        | 1,69               |                            | 1,03           | N/A                        | 0,42              |                            | 0,41           | n.s.                       | 0,70                 |                            | 0,60           |                            |
| 1257,44                    | 33,56                   | Heterogeneous nuclear ribonucleoprotein U            | N/A            | 0,97                       | 1,29           | 0,02                       | 0,73            | 0,81                       | 0,81           | n.s.                       | 1,32               |                            | 1,54           | n.s.                       | 0,70              |                            | 1,51           | n.s.                       | 0,68                 |                            | 0,37           |                            |
| 2356,66                    | 35,60                   |                                                      | N/A            | 0,56                       | 1,05           | 0,02                       | 0,79            | 0,82                       | 0,82           | N/A                        | 0,40               |                            | 0,59           | N/A                        | 0,48              |                            | 0,31           | n.s.                       | 0,56                 |                            | 0,58           |                            |
| 1350,62                    | 27,21                   | Mucin-4                                              | n.s.           | 0,75                       | 1,24           | 0,02                       | 0,70            | 0,92                       | 0,92           | N/A                        | 0,83               |                            | 0,88           | N/A                        | 1,07              |                            | 1,01           | n.s.                       | 0,80                 |                            | 0,52           |                            |
| 3281,43                    | 35,96                   | Collagen alpha-1(XI) chain                           | n.s.           | 0,98                       | 0,75           | 0,03                       | 0,69            | 1,62                       | 1,62           | n.s.                       | 0,69               | n.s.                       | 1,10           | n.s.                       | 0,89              |                            | 0,89           | n.s.                       | 1,53                 |                            | 1,46           |                            |
| 1438,67                    | 28,06                   | Collagen alpha-1(III) chain                          | n.s.           | 0,77                       | 0,91           | n.s.                       | 0,88            | 0,82                       | 0,82           | 0,02                       | 0,78               | n.s.                       | 1,23           | n.s.                       | 0,90              |                            | 0,85           | n.s.                       | 0,90                 |                            | 1,12           |                            |
| 1684,66                    | 30,88                   | Collagen alpha-1(I) chain                            | N/A            | 0,40                       | 3,50           | N/A                        | 0,95            | 1,08                       | 1,08           | 0,03                       | 0,80               | n.s.                       | 0,90           | n.s.                       | 0,79              |                            | 1,59           | N/A                        | 0,30                 |                            | 0,36           |                            |
| 1793,89                    | 32,41                   | Fibrinogen beta chain                                | n.s.           | 1,43                       | 1,62           | n.s.                       | 1,15            | 1,14                       | 1,14           | n.s.                       | 1,16               | n.s.                       | 0,65           | 0,00                       | 0,90              | n.s.                       | 0,96           | n.s.                       | 1,42                 | n.s.                       | 2,45           |                            |
| 2999,30                    | 22,24                   | Collagen alpha-1(I) chain                            | n.s.           | 1,35                       | 0,77           | n.s.                       | 1,31            | 0,88                       | 0,88           | n.s.                       | 1,16               |                            | 1,16           | 0,01                       | 1,61              | n.s.                       | 1,00           | n.s.                       | 1,78                 |                            | 1,43           |                            |
| 980,29                     | 35,64                   |                                                      | N/A            | 4,12                       | 1,29           | N/A                        | 0,62            | 1,37                       | 1,37           | N/A                        | 0,62               |                            | 0,63           | 0,02                       | 0,52              |                            | 1,33           | N/A                        | 1,21                 |                            | 1,19           |                            |
| 1809,87                    | 32,43                   | Acyl-protein thioesterase 2                          | N/A            | 1,92                       | 6,06           | N/A                        | 2,16            | 4,01                       | 4,01           | N/A                        | 1,91               |                            | 1,52           | 0,01                       | 1,20              | n.s.                       | 0,76           | N/A                        | 6,88                 |                            | 12,66          |                            |
| 2321,19                    | 22,06                   | Fibrinogen beta chain                                | N/A            | 3,57                       | 2,56           | N/A                        | 1,13            | 0,78                       | 0,78           | N/A                        | 2,18               |                            | 1,37           | 0,01                       | 1,65              | n.s.                       | 0,38           | N/A                        | 2,48                 |                            | 4,42           |                            |
| 2479,06                    | 47,73                   | Mucin-22                                             | N/A            | 0,46                       | 0,91           | N/A                        | 1,04            | 1,18                       | 1,18           | N/A                        | 0,59               |                            | 0,70           | 0,00                       | 0,27              | n.s.                       | 0,18           | N/A                        | 0,48                 |                            | 0,36           |                            |
| 3021,38                    | 23,21                   | Collagen alpha-1(XI) chain                           | N/A            | 0,72                       | 0,37           | N/A                        | 1,18            | 0,62                       | 0,62           | N/A                        | 0,51               |                            | 0,60           | 0,00                       | 0,31              | n.s.                       | 0,76           | N/A                        | 0,77                 |                            | 0,82           |                            |
| 2064,92                    | 24,43                   | Collagen alpha-1(II) chain                           | n.s.           | 1,19                       | 1,54           | n.s.                       | 0,91            | 1,15                       | 1,15           | n.s.                       | 0,93               |                            | 1,62           | n.s.                       | 0,83              | n.s.                       | 0,74           | 0,00                       | 1,82                 | n.s.                       | 1,55           |                            |
| 1732,77                    | 28,30                   |                                                      | n.s.           | 1,12                       | 1,39           | n.s.                       | 0,96            | 0,95                       | 0,95           | n.s.                       | 0,80               |                            | 0,50           | N/A                        | 0,94              |                            | 1,03           | 0,02                       | 0,61                 | n.s.                       | 1,02           |                            |
| 3091,46                    | 28,24                   |                                                      | n.s.           | 0,82                       | 0,42           | n.s.                       | 0,81            | 0,77                       | 0,77           | N/A                        | 0,45               |                            | 0,46           | N/A                        | 0,51              |                            | 0,52           | 0,01                       | 0,47                 | n.s.                       | 0,94           |                            |
| 2907,35                    | 35,85                   | Collagen alpha-2(I) chain                            | n.s.           | 1,52                       | 0,91           | N/A                        | 1,39            | 1,68                       | 1,68           | N/A                        | 0,92               |                            | 0,65           | n.s.                       | 1,08              |                            | 0,78           | 0,02                       | 2,28                 | n.s.                       | 1,39           |                            |
| 928,37                     | 35,53                   | Collagen alpha-5(VI) chain                           | N/A            | 0,86                       | 1,37           | N/A                        | 0,84            | 0,66                       | 0,66           | N/A                        | 2,27               |                            | 0,59           | N/A                        | 1,20              |                            | 0,94           | N/A                        | 0,43                 |                            | 0,23           |                            |
| 949,22                     | 34,54                   |                                                      | N/A            | 0,97                       | 1,07           | N/A                        | 0,76            | 0,91                       | 0,91           | N/A                        | 1,26               |                            | 0,62           | N/A                        | 0,41              |                            | 0,87           | N/A                        | 0,87                 |                            | 0,07           |                            |
| 956,45                     | 20,35                   | Mucin-12                                             | N/A            | 3,84                       | 1,38           | N/A                        | 0,57            | 1,36                       | 1,36           | n.s.                       | 0,93               |                            | 1,32           | N/A                        | 0,85              |                            | 1,26           | N/A                        | 0,59                 |                            | 0,16           |                            |
| 992,42                     | 20,37                   | PHD finger protein 10                                | N/A            | 2,16                       | 0,25           | N/A                        | 0,78            | 0,97                       | 0,97           | N/A                        | 0,48               |                            | 0,49           | N/A                        | 0,68              |                            | 2,30           | N/A                        | 0,46                 |                            | 0,09           |                            |
| 1007,31                    | 35,68                   |                                                      | N/A            | 3,92                       | 1,48           | N/A                        | 1,51            | 2,26                       | 2,26           | N/A                        | 1,13               |                            | 0,57           | N/A                        | 0,42              |                            | 1,08           | N/A                        | 0,74                 |                            | 0,72           |                            |
| 1013,37                    | 25,06                   | Inositol 1,4,5-trisphosphate receptor type 2         | n.s.           | 1,12                       | 1,14           | 0,00                       | 0,66            | 0,73                       | 0,73           | n.s.                       | 1,47               |                            | 1,81           | 0,02                       | 0,57              |                            | 0,63           | n.s.                       | 0,81                 |                            | 0,38           |                            |
| 1060,38                    | 38,03                   |                                                      | N/A            | 0,79                       | 0,81           | N/A                        | 0,59            | 0,33                       | 0,33           | N/A                        | 1,27               |                            | 1,13           | N/A                        | 1,01              |                            | 1,57           | N/A                        | 0,35                 |                            | 0,34           |                            |
| 1069,48                    | 25,33                   | Collagen alpha-1(III) chain                          | N/A            | 0,56                       | 0,68           | N/A                        | 0,71            | 0,81                       | 0,81           | N/A                        | 0,83               |                            | 1,36           | N/A                        | 0,69              |                            | 1,27           | N/A                        | 1,48                 |                            | 0,32           |                            |
| 1075,49                    | 20,68                   | Myeloperoxidase                                      | N/A            | 1,45                       | 0,27           | N/A                        | 1,12            | 1,50                       | 1,50           | N/A                        | 0,39               |                            | 0,43           | N/A                        | 0,59              |                            | 0,32           | N/A                        | 0,43                 |                            | 0,11           |                            |
| 1114,48                    | 24,04                   | Collagen alpha-1(III) chain                          | N/A            | 0,82                       | 1,01           | N/A                        | 0,78            | 0,82                       | 0,82           | N/A                        | 0,69               |                            | 0,70           | N/A                        | 0,44              |                            | 0,52           | N/A                        | 0,67                 |                            | 0,25           |                            |
| 1115,51                    | 21,60                   | Collagen alpha-1(III) chain                          | N/A            | 2,60                       | 7,82           | N/A                        | 1,36            | 1,48                       | 1,48           | N/A                        | 0,77               |                            | 0,98           | N/A                        | 0,98              |                            | 0,62           | N/A                        | 2,94                 |                            | 0,79           |                            |
| 1128,4                     | 33,10                   |                                                      | N/A            | 0,69                       | 1,15           | N/A                        | 0,57            | 0,83                       | 0,83           | N/A                        | 1,61               |                            | 1,98           | N/A                        | 1,08              |                            | 1,46           | N/A                        | 0,45                 |                            | 0,23           |                            |
| 1161,5                     | 37,60                   | Collagen alpha-1(XV) chain                           | N/A            | 2,60                       | 5,75           | N/A                        | 0,65            | 0,89                       | 0,89           | N/A                        | 2,08               |                            | 3,52           | N/A                        | 0,98              |                            | 1,60           | N/A                        | 0,76                 |                            | 0,77           |                            |
| 1178,38                    | 20,44                   | GC-rich sequence DNA-binding factor 1                | N/A            | 1,06                       | 0,58           | N/A                        | 1,20            | 0,72                       | 0,72           | N/A                        | 0,55               |                            | 0,31           | N/A                        | 0,48              |                            | 0,74           | N/A                        | 0,30                 |                            | 0,04           |                            |
| 1181,48                    | 36,80                   | Collagen alpha-1(I) chain                            | N/A            | 0,73                       | 1,42           | N/A                        | 0,68            | 1,13                       | 1,13           | N/A                        | 1,56               |                            | 1,14           | N/A                        | 1,00              |                            | 1,68           | N/A                        | 0,21                 |                            | 0,16           |                            |
| 1182,55                    | 28,20                   | Collagen alpha-3(IV) chain                           | N/A            | 1,34                       | 4,27           | N/A                        | 0,68            | 0,50                       | 0,50           | N/A                        | 0,74               |                            | 0,77           | N/A                        | 0,85              |                            | 1,01           | N/A                        | 0,19                 |                            | 0,24           |                            |
| 1208,38                    | 45,14                   |                                                      | N/A            | 0,93                       | 2,74           | N/A                        | 0,68            | 0,41                       | 0,41           | N/A                        | 0,90               |                            | 1,14           | N/A                        | 0,83              |                            | 2,40           | N/A                        | 0,12                 |                            | 0,08           |                            |
| 1215,44                    | 26,94                   |                                                      | N/A            | 0,48                       | 0,76           | N/A                        | 0,77            | 0,76                       | 0,76           | N/A                        | 1,08               |                            | 0,36           | N/A                        | 1,10              |                            | 1,39           | N/A                        | 0,46                 |                            | 0,37           |                            |
| 1216,54                    | 24,59                   |                                                      | n.s.           | 1,12                       | 1,83           | n.s.                       | 0,84            | 0,88                       | 0,88           | 0,02                       | 0,80               |                            | 0,71           | n.s.                       | 0,77              |                            | 1,34           | 0,04                       | 0,53                 |                            | 0,29           |                            |
| 1217,48                    | 27,78                   | E3 ubiquitin-protein ligase UBR2                     | N/A            | 0,45                       | 0,97           | N/A                        |                 |                            |                |                            |                    |                            |                |                            |                   |                            |                |                            |                      |                            |                |                            |

| 193-peptide marker pattern |                         |                                          | Bladder cancer |                            |                |                            | Prostate cancer |                            |                |                            | Cholangiocarcinoma |                            |                |                            | Pancreatic cancer |                            |                |                            | Renal cell carcinoma |                            |                |                            |
|----------------------------|-------------------------|------------------------------------------|----------------|----------------------------|----------------|----------------------------|-----------------|----------------------------|----------------|----------------------------|--------------------|----------------------------|----------------|----------------------------|-------------------|----------------------------|----------------|----------------------------|----------------------|----------------------------|----------------|----------------------------|
| Mass [Da]                  | CE migration time [min] | Protein name                             | Discovery set  |                            | Validation set |                            | Discovery set   |                            | Validation set |                            | Discovery set      |                            | Validation set |                            | Discovery set     |                            | Validation set |                            | Discovery set        |                            | Validation set |                            |
|                            |                         |                                          | adj. P-value   | Fold change (case/control) | unadj. P-value | Fold change (case/control) | adj. P-value    | Fold change (case/control) | unadj. P-value | Fold change (case/control) | adj. P-value       | Fold change (case/control) | unadj. P-value | Fold change (case/control) | adj. P-value      | Fold change (case/control) | unadj. P-value | Fold change (case/control) | adj. P-value         | Fold change (case/control) | unadj. P-value | Fold change (case/control) |
| 1383,63                    | 38,90                   | Ras and Rab interactor 3                 | N/A            | 4,06                       |                | 15,42                      | N/A             | 0,71                       |                | 0,33                       | N/A                | 0,39                       |                | 0,42                       | N/A               | 0,89                       |                | 0,74                       | N/A                  | 0,86                       |                | 1,44                       |
| 1390,44                    | 36,82                   |                                          | n.s            | 1,05                       |                | 1,46                       | n.s             | 0,91                       |                | 0,59                       | n.s                | 0,73                       |                | 0,91                       | n.s               | 0,72                       |                | 0,90                       | n.s                  | 0,83                       |                | 0,38                       |
| 1396,62                    | 26,63                   | Collagen alpha-1(III) chain              | N/A            | 0,69                       |                | 0,94                       | N/A             | 0,86                       |                | 0,58                       | N/A                | 0,71                       |                | 0,87                       | N/A               | 0,44                       |                | 0,47                       | N/A                  | 0,78                       |                | 0,76                       |
| 1407,64                    | 27,55                   | Collagen alpha-1(I) chain                | N/A            | 0,63                       |                | 0,92                       | N/A             | 0,47                       |                | 1,23                       | N/A                | 0,80                       |                | 0,65                       | N/A               | 0,72                       |                | 1,33                       | N/A                  | 1,55                       |                | 1,35                       |
| 1408,65                    | 39,07                   | Collagen alpha-1(I) chain                | N/A            | 1,86                       |                | 2,53                       | N/A             | 0,71                       |                | 0,58                       | N/A                | 0,82                       |                | 0,55                       | N/A               | 1,23                       |                | 1,08                       | N/A                  | 2,00                       |                | 1,28                       |
| 1422,53                    | 37,70                   | Ankyrin repeat domain 17                 | N/A            | 0,68                       |                | 1,06                       | N/A             | 0,93                       |                | 0,68                       | 0,00               | 0,69                       |                | 0,65                       | 0,00              | 0,49                       |                | 1,14                       | n.s                  | 0,78                       |                | 1,21                       |
| 1423,64                    | 37,35                   | Fibrinogen alpha chain                   | N/A            | 2,02                       |                | 1,28                       | N/A             | 1,82                       |                | 1,12                       | N/A                | 1,76                       |                | 0,96                       | N/A               | 0,91                       |                | 0,63                       | N/A                  | 0,79                       |                | 0,13                       |
| 1425,59                    | 22,34                   |                                          | n.s            | 1,00                       |                | 1,03                       | 0,01            | 0,81                       |                | 0,77                       | 0,00               | 0,56                       |                | 0,54                       | 0,00              | 0,52                       |                | 0,71                       | n.s                  | 0,88                       |                | 0,58                       |
| 1462,61                    | 39,50                   | Collagen alpha-3(V) chain                | N/A            | 1,25                       |                | 2,80                       | N/A             | 1,38                       |                | 0,99                       | N/A                | 1,02                       |                | 0,72                       | N/A               | 1,27                       |                | 6,43                       | N/A                  | 0,25                       |                | 0,09                       |
| 1485,68                    | 23,77                   | Collagen alpha-1(I) chain                | n.s            | 1,11                       |                | 0,94                       | n.s             | 0,94                       |                | 1,01                       | 0,00               | 0,72                       |                | 0,76                       | 0,03              | 0,76                       |                | 0,97                       | n.s                  | 1,07                       |                | 0,63                       |
| 1495,68                    | 39,45                   | Collagen alpha-1(I) chain                | N/A            | 1,31                       |                | 3,05                       | N/A             | 0,85                       |                | 0,46                       | N/A                | 1,67                       |                | 1,54                       | N/A               | 1,31                       |                | 1,20                       | N/A                  | 3,81                       |                | 2,45                       |
| 1505,61                    | 28,85                   | Nuclear receptor corepressor 1           | N/A            | 0,78                       |                | 0,61                       | N/A             | 0,95                       |                | 0,86                       | N/A                | 0,81                       |                | 0,82                       | N/A               | 0,80                       |                | 1,70                       | N/A                  | 0,51                       |                | 0,30                       |
| 1524,65                    | 20,03                   | Collagen alpha-1(XI) chain               | n.s            | 0,92                       |                | 0,85                       | n.s             | 0,87                       |                | 0,69                       | 0,00               | 0,47                       |                | 0,73                       | 0,01              | 0,59                       |                | 0,65                       | n.s                  | 0,76                       |                | 0,28                       |
| 1525,55                    | 21,83                   |                                          | N/A            | 0,59                       |                | 0,93                       | N/A             | 2,03                       |                | 2,30                       | N/A                | 0,71                       |                | 0,64                       | N/A               | 0,39                       |                | 1,36                       | N/A                  | 0,99                       |                | 0,23                       |
| 1552,5                     | 39,02                   |                                          | N/A            | 0,68                       |                | 2,38                       | N/A             | 2,29                       |                | 0,96                       | N/A                | 0,16                       |                | 0,21                       | N/A               | 0,36                       |                | 1,02                       | N/A                  | 0,66                       |                | 0,24                       |
| 1560,57                    | 21,53                   |                                          | N/A            | 0,55                       |                | 0,62                       | N/A             | 1,41                       |                | 1,47                       | N/A                | 0,63                       |                | 0,19                       | N/A               | 0,53                       |                | 1,17                       | N/A                  | 0,18                       |                | 0,00                       |
| 1564,72                    | 28,29                   | Collagen alpha-1(V) chain                | N/A            | 0,47                       |                | 0,50                       | N/A             | 0,56                       |                | 1,10                       | N/A                | 0,61                       |                | 0,32                       | N/A               | 0,86                       |                | 0,62                       | N/A                  | 1,64                       |                | 2,65                       |
| 1594,76                    | 40,28                   | Collagen alpha-1(I) chain                | n.s            | 1,09                       |                | 1,18                       | n.s             | 1,19                       |                | 1,01                       | n.s                | 0,77                       |                | 0,81                       | n.s               | 1,02                       |                | 1,16                       | n.s                  | 1,51                       |                | 1,88                       |
| 1610,88                    | 30,35                   |                                          | N/A            | 1,36                       |                | 3,05                       | N/A             | 1,48                       |                | 1,06                       | N/A                | 2,16                       |                | 1,75                       | N/A               | 1,60                       |                | 1,32                       | N/A                  | 1,21                       |                | 1,80                       |
| 1620,7                     | 22,69                   | Collagen alpha-2(I) chain                | N/A            | 1,54                       |                | 0,92                       | N/A             | 0,73                       |                | 0,45                       | N/A                | 0,27                       |                | 0,31                       | N/A               | 0,53                       |                | 1,41                       | N/A                  | 1,04                       |                | 1,42                       |
| 1651,79                    | 40,75                   | Collagen alpha-1(I) chain                | n.s            | 1,10                       |                | 1,13                       | 0,03            | 1,18                       |                | 1,04                       | n.s                | 0,96                       |                | 0,98                       | n.s               | 1,12                       |                | 1,08                       | 0,02                 | 1,96                       |                | 1,77                       |
| 1703,83                    | 33,54                   | Collagen alpha-3(V) chain                | N/A            | 1,54                       |                | 1,13                       | N/A             | 0,91                       |                | 0,57                       | N/A                | 0,30                       |                | 1,08                       | N/A               | 0,31                       |                | 0,25                       | N/A                  | 0,39                       |                | 1,41                       |
| 1716,65                    | 20,16                   |                                          | N/A            | 1,30                       |                | 0,63                       | N/A             | 0,95                       |                | 0,66                       | N/A                | 0,64                       |                | 0,31                       | N/A               | 0,62                       |                | 0,96                       | N/A                  | 0,63                       |                | 0,18                       |
| 1720,69                    | 19,64                   |                                          | N/A            | 0,84                       |                | 0,38                       | N/A             | 0,75                       |                | 0,45                       | N/A                | 0,72                       |                | 0,36                       | N/A               | 1,35                       |                | 2,21                       | N/A                  | 0,43                       |                | 0,03                       |
| 1734,66                    | 19,83                   |                                          | N/A            | 0,94                       |                | 0,46                       | N/A             | 0,98                       |                | 0,65                       | N/A                | 0,54                       |                | 0,41                       | N/A               | 0,64                       |                | 0,88                       | N/A                  | 0,40                       |                | 0,12                       |
| 1764,68                    | 19,92                   |                                          | N/A            | 1,06                       |                | 0,92                       | N/A             | 0,82                       |                | 0,61                       | N/A                | 0,71                       |                | 0,18                       | N/A               | 0,69                       |                | 1,73                       | N/A                  | 0,45                       |                | 0,04                       |
| 1767                       | 24,90                   |                                          | N/A            | 0,08                       |                | 0,04                       | N/A             | 1,70                       |                | 10,42                      | N/A                | 0,34                       |                | 0,42                       | N/A               | 0,28                       |                | 1,23                       | N/A                  | 1,04                       |                | 1,42                       |
| 1767,78                    | 19,80                   | Fibrinogen alpha chain                   | N/A            | 0,88                       |                | 1,21                       | N/A             | 1,54                       |                | 1,01                       | N/A                | 1,92                       |                | 4,23                       | N/A               | 1,92                       |                | 0,53                       | N/A                  | 2,30                       |                | 0,77                       |
| 1817,7                     | 20,25                   | Stabillin-2                              | n.s            | 0,80                       |                | 1,02                       | n.s             | 0,87                       |                | 0,73                       | 0,01               | 0,71                       |                | 0,31                       | n.s               | 0,85                       |                | 1,33                       | 0,04                 | 0,59                       |                | 0,33                       |
| 1828,85                    | 21,21                   | Collagen alpha-1(I) chain                | N/A            | 1,54                       |                | 1,21                       | N/A             | 1,38                       |                | 1,84                       | N/A                | 2,04                       |                | 1,33                       | N/A               | 0,94                       |                | 1,00                       | N/A                  | 1,42                       |                | 0,36                       |
| 1858,84                    | 24,34                   | Prostaglandin-H2 D-isomerase             | N/A            | 0,87                       |                | 1,74                       | N/A             | 1,21                       |                | 0,18                       | N/A                | 1,12                       |                | 5,76                       | N/A               | 0,51                       |                | 0,37                       | N/A                  | 0,26                       |                | 1,33                       |
| 1885,87                    | 21,25                   | Collagen alpha-1(I) chain                | N/A            | 1,73                       |                | 1,12                       | N/A             | 1,79                       |                | 4,40                       | N/A                | 1,49                       |                | 1,97                       | N/A               | 2,12                       |                | 1,31                       | N/A                  | 1,80                       |                | 0,66                       |
| 1889,86                    | 33,19                   | Collagen alpha-2(IV) chain               | N/A            | 1,11                       |                | 0,89                       | N/A             | 3,36                       |                | 7,91                       | N/A                | 0,99                       |                | 0,93                       | N/A               | 1,25                       |                | 0,82                       | N/A                  | 3,06                       |                | 5,57                       |
| 1892,87                    | 22,13                   | Collagen alpha-1(I) chain                | n.s            | 1,21                       |                | 0,99                       | 0,01            | 1,65                       |                | 1,33                       | n.s                | 1,09                       |                | 1,38                       | n.s               | 0,94                       |                | 0,61                       | 0,03                 | 1,73                       |                | 1,00                       |
| 1893,04                    | 29,05                   | 26S protease regulatory subunit 10B      | N/A            | 0,53                       |                | 0,90                       | N/A             | 0,86                       |                | 0,82                       | N/A                | 0,83                       |                | 0,76                       | N/A               | 0,57                       |                | 0,19                       | N/A                  | 0,74                       |                | 0,49                       |
| 1899,81                    | 22,44                   |                                          | N/A            | 0,60                       |                | 0,23                       | N/A             | 1,81                       |                | 0,23                       | N/A                | 0,56                       |                | 0,38                       | N/A               | 0,32                       |                | 0,97                       | N/A                  | 0,10                       |                | 0,05                       |
| 1911,05                    | 25,23                   |                                          | n.s            | 0,89                       |                | 0,88                       | 0,00            | 0,61                       |                | 0,79                       | 0,00               | 0,50                       |                | 0,57                       | 0,00              | 0,52                       |                | 0,63                       | n.s                  | 0,92                       |                | 0,84                       |
| 1915                       | 33,62                   | Metastasis suppressor protein 1          | N/A            | 1,01                       |                | 3,00                       | N/A             | 2,24                       |                | 1,08                       | N/A                | 2,54                       |                | 1,48                       | N/A               | 4,25                       |                | 1,53                       | N/A                  | 3,43                       |                | 9,03                       |
| 1933,88                    | 21,64                   | Collagen alpha-1(I) chain                | n.s            | 1,23                       |                | 0,79                       | 0,03            | 1,48                       |                | 1,53                       | n.s                | 1,22                       |                | 1,61                       | 0,01              | 1,50                       |                | 0,97                       | n.s                  | 1,95                       |                | 1,03                       |
| 1945                       | 33,66                   | Glycogen phosphorylase, brain form       | n.s            | 1,17                       |                | 1,49                       | n.s             | 1,21                       |                | 0,91                       | n.s                | 1,61                       |                | 0,97                       | n.s               | 2,05                       |                | 1,27                       | n.s                  | 1,38                       |                | 2,89                       |
| 1991,94                    | 22,05                   | Collagen alpha-1(III) chain              | n.s            | 1,47                       |                | 1,00                       | 0,03            | 1,24                       |                | 0,96                       | 0,02               | 2,19                       |                | 2,01                       | 0,01              | 1,80                       |                | 0,88                       | 0,01                 | 2,33                       |                | 2,39                       |
| 1996,78                    | 20,96                   |                                          | N/A            | 1,07                       |                | 0,51                       | n.s             | 1,01                       |                | 0,69                       | 0,03               | 0,71                       |                | 0,24                       | N/A               | 0,89                       |                | 1,47                       | 0,01                 | 0,42                       |                | 0,17                       |
| 2093,93                    | 33,71                   | Collagen alpha-2(I) chain                | N/A            | 1,49                       |                | 1,67                       | N/A             | 4,76                       |                | 4,76                       | N/A                | 0,98                       |                | 0,43                       | N/A               | 0,75                       |                | 0,78                       | N/A                  | 2,44                       |                | 5,91                       |
| 2152,97                    | 32,92                   |                                          | N/A            | 0,98                       |                | 3,49                       | N/A             | 0,96                       |                | 1,05                       | N/A                | 2,54                       |                | 1,47                       | N/A               | 2,99                       |                | 0,71                       | N/A                  | 2,89                       |                | 4,96                       |
| 2170,97                    | 27,53                   | Collagen alpha-1(I) chain                | N/A            | 0,42                       |                | 0,54                       | N/A             | 0,90                       |                | 0,93                       | N/A                | 0,99                       |                | 0,31                       | N/A               | 1,75                       |                | 0,74                       | N/A                  | 1,01                       |                | 1,25                       |
| 2187,96                    | 39,54                   | Mucin-12                                 | n.s            | 0,72                       |                | 0,83                       | n.s             | 0,96                       |                | 0,97                       | 0,01               | 0,57                       |                | 0,61                       | 0,02              | 0,30                       |                | 0,55                       | 0,02                 | 0,58                       |                | 0,37                       |
| 2199                       | 22,33                   | Collagen alpha-1(I) chain                | N/A            | 2,49                       |                | 0,57                       | N/A             | 0,06                       |                | 1,33                       | N/A                | 0,82                       |                | 1,11                       | N/A               | 1,93                       |                | 1,23                       | N/A                  | 2,75                       |                | 0,74                       |
| 2264,94                    | 43,13                   | Collagen alpha-2(IV) chain               | N/A            | 0,55                       |                | 1,45                       | N/A             | 2,79                       |                | 5,60                       | N/A                | 1,58                       |                | 0,67                       | N/A               | 1,24                       |                | 0,45                       | N/A                  | 1,04                       |                | 0,72                       |
| 2272,24                    | 23,91                   | Histone deacetylase 6                    | N/A            | 2,98                       |                | 1,53                       | N/A             | 1,01                       |                | 0,65                       | N/A                | 2,05                       |                | 1,94                       | 0,04              | 1,93                       |                | 1,14                       | 0,00                 | 3,95                       |                | 2,66                       |
| 2306,04                    | 19,52                   | Fibrinogen alpha chain                   | N/A            | 0,54                       |                | 1,13                       | N/A             | 0,74                       |                | 1,13                       | N/A                | 5,07                       |                | 7,72                       | N/A               | 4,85                       |                | 1,11                       | N/A                  | 2,87                       |                | 2,30                       |
| 2548                       | 21,36                   |                                          | N/A            | 0,68                       |                | 0,49                       | N/A             | 1,15                       |                | 1,08                       | N/A                | 0,81                       |                | 0,27                       | N/A               | 1,32                       |                | 1,19                       | N/A                  | 0,69                       |                | 0,58                       |
| 2565,15                    | 23,60                   | Collagen alpha-1(XVII) chain             | N/A            | 1,26                       |                | 1,50                       | N/A             | 0,93                       |                | 1,27                       | N/A                | 3,43                       |                | 3,08                       | N/A               | 1,38                       |                | 0,81                       | N/A                  | 7,31                       |                | 6,88                       |
| 2583,2                     | 28,30                   | Collagen alpha-1(I) chain                | n.s            | 1,20                       |                | 0,70                       | n.s             | 0,98                       |                | 1,26                       | 0,01               | 1,49                       |                | 1,69                       | 0,02              | 1,53                       |                | 1,10                       | 0,01                 | 1,53                       |                | 2,88                       |
| 2600,23                    | 35,20                   | Collagen alpha-1(I) chain                | N/A            | 2,16                       |                | 1,35                       | N/A             | 0,99                       |                | 1,37                       | N/A                | 1,55                       |                | 0,26                       | N/A               | 1,18                       |                | 0,88                       | N/A                  | 2,54                       |                | 2,46                       |
| 2647,21                    | 23,52                   | Collagen alpha-1(III) chain              | N/A            | 3,29                       |                | 1,25                       | N/A             | 1,73                       |                | 1,20                       | N/A                | 1,28                       |                | 2,37                       | N/A               | 0,98                       |                | 0,71                       | N/A                  | 1,75                       |                | 0,60                       |
| 2663,21                    | 23,57                   | Collagen alpha-1(III) chain              | 0,02           | 1,92                       |                | 1,19                       | 0,02            | 1,51                       |                | 0,99                       | n.s                | 0,88                       |                | 1,10                       | n.s               | 0,80                       |                | 0,73                       | 0,04                 | 1,71                       |                | 1,20                       |
| 2734,29                    | 27,99                   |                                          | N/A            | 1,07                       |                | 2,35                       | N/A             | 3,06                       |                | 3,35                       | N/A                | 2,43                       |                | 1,09                       | N/A               | 1,09                       |                | 0,95                       | N/A                  | 4,95                       |                | 3,46                       |
| 2739,23                    | 28,46                   | Chloride intracellular channel protein 6 | N/A            | 1,13                       |                | 0,81                       | N/A             | 1,53                       |                | 1,12                       | N/A                | 1,58                       |                | 2,09                       | N/A               | 1,38                       |                | 0,92                       | N/A                  | 1,50                       |                | 3,09                       |
| 2751,34                    | 29,11                   |                                          | N/A            | 0,77                       |                | 0,57                       | N/A             | 0,64                       |                | 0,52                       | N/A                | 0,32                       |                | 0,46                       | N/A               | 0,27                       |                | 0,63                       | N/A                  | 0,93                       |                | 0,72                       |
| 2808,3                     | 24,33                   |                                          | N/A            | 1,37                       |                | 0,92                       | N/A             | 1,55                       |                | 2,98                       | N/A                | 0,96                       |                | 0,80                       | N/A               | 1,22                       |                | 0,70                       | N/A                  | 5,14                       |                | 5,19                       |
| 2834,19                    | 22,35                   |                                          | N/A            | 0,43                       |                | 0,26                       | N/A             | 0,94                       |                | 0,91                       | N/A                | 0,26                       |                | 0,21                       | N/A               | 0,27                       |                | 0,21                       | N/A                  | 0,14                       |                | 0,09                       |
| 2854,37                    | 34,67                   | Collagen alpha-1(III) chain              | n.s            | 0,75                       |                | 1,14                       | 0,00            | 0,68                       |                | 0,73                       | 0,00               | 0,54                       |                | 0,49                       | 0,00              | 0,58                       |                | 0,88                       | n.s                  | 0,62                       |                | 1,00                       |
| 2861,29                    | 48,80                   | Protein transport protein Sec31A         | N/A            | 0,29                       |                | 1,24                       | N/A             | 0,57                       |                | 0,88                       | N/A                | 1,18                       |                | 1,18                       | N/A               | 0,74                       |                | 0,46                       | N/A                  | 0,78                       |                | 0,13                       |
| 2887,35                    | 35,57                   | Collagen alpha-2(V) chain                | N/A            | 1,55                       |                | 1,08                       | N/A             | 1,11                       |                | 1,32                       | n.s                | 1,24                       |                | 0,98                       | n.s               | 1,15                       |                | 0,44                       | N/A                  | 2,00                       |                | 1,53                       |
| 2903,35                    | 35,64                   | Collagen alpha-2(I) chain                | N/A            | 1,62                       |                | 4,36                       | N/A             | 2,03                       |                | 1,36                       | N/A                | 1,42                       |                | 1,22                       | N/A               | 1,25                       |                | 0,60                       | N/A                  | 2,40                       |                | 2,59                       |
| 2946,2                     | 35,07                   |                                          | N/A            | 2,33                       |                | 0,61                       | N/A             | 2,13                       |                | 1,34                       | N/A                | 1,02                       |                | 0,71                       | N/A               | 1,04                       |                | 1,03                       | N/A                  | 0,51                       |                | 3,81                       |
| 2959,36                    | 48,32                   | Collagen alpha-1(III) chain              | N/A            | 0,35                       |                | 1,37                       | N/A             | 0,51                       |                |                            |                    |                            |                |                            |                   |                            |                |                            |                      |                            |                |                            |

| 193-peptide marker pattern |                         |                             | Bladder cancer |                            |                |                            | Prostate cancer |                            |                |                            | Cholangiocarcinoma |                            |                |                            | Pancreatic cancer |                            |                |                            | Renal cell carcinoma |                            |                |                            |
|----------------------------|-------------------------|-----------------------------|----------------|----------------------------|----------------|----------------------------|-----------------|----------------------------|----------------|----------------------------|--------------------|----------------------------|----------------|----------------------------|-------------------|----------------------------|----------------|----------------------------|----------------------|----------------------------|----------------|----------------------------|
| Mass [Da]                  | CE migration time [min] | Protein name                | Discovery set  |                            | Validation set |                            | Discovery set   |                            | Validation set |                            | Discovery set      |                            | Validation set |                            | Discovery set     |                            | Validation set |                            | Discovery set        |                            | Validation set |                            |
|                            |                         |                             | adj. P-value   | Fold change (case/control) | unadj. P-value | Fold change (case/control) | adj. P-value    | Fold change (case/control) | unadj. P-value | Fold change (case/control) | adj. P-value       | Fold change (case/control) | unadj. P-value | Fold change (case/control) | adj. P-value      | Fold change (case/control) | unadj. P-value | Fold change (case/control) | adj. P-value         | Fold change (case/control) | unadj. P-value | Fold change (case/control) |
| 3318,52                    | 30,97                   | Collagen alpha-1(I) chain   | N/A            | 1,88                       |                | 2,43                       | N/A             | 2,26                       |                | 2,22                       | N/A                | 2,05                       |                | 0,97                       | N/A               | 0,79                       |                | 1,27                       | N/A                  | 1,27                       |                | 3,28                       |
| 3356,52                    | 25,46                   | Collagen alpha-1(I) chain   | N/A            | 2,07                       |                | 2,89                       | N/A             | 2,33                       |                | 8,72                       | N/A                | 1,26                       |                | 2,82                       | N/A               | 1,12                       |                | 0,85                       | N/A                  | 5,73                       |                | 4,75                       |
| 3385,59                    | 25,54                   |                             | N/A            | 1,59                       |                | 0,92                       | N/A             | 0,94                       |                | 1,01                       | N/A                | 0,76                       |                | 0,72                       | N/A               | 1,12                       |                | 1,23                       | N/A                  | 1,80                       |                | 2,29                       |
| 3401,61                    | 25,47                   | Collagen alpha-1(V) chain   | 0,02           | 1,61                       |                | 0,81                       | n.s             | 1,04                       |                | 1,22                       | n.s                | 0,92                       |                | 1,35                       | n.s               | 0,91                       |                | 1,14                       | 0,00                 | 2,04                       |                | 1,58                       |
| 3439,59                    | 38,90                   | Collagen alpha-1(XII) chain | N/A            | 1,61                       |                | 6,36                       | N/A             | 0,72                       |                | 0,73                       | N/A                | 0,43                       |                | 2,88                       | N/A               | 1,07                       |                | 0,47                       | N/A                  | 1,58                       |                | 2,60                       |
| 3489,58                    | 31,42                   |                             | N/A            | 1,35                       |                | 0,97                       | N/A             | 2,28                       |                | 2,87                       | N/A                | 0,83                       |                | 1,73                       | N/A               | 0,63                       |                | 1,02                       | N/A                  | 1,01                       |                | 0,98                       |
| 3546,67                    | 26,15                   |                             | N/A            | 3,08                       |                | 2,40                       | N/A             | 4,54                       |                | 1,52                       | N/A                | 3,11                       |                | 1,96                       | N/A               | 0,26                       |                | 0,39                       | N/A                  | 0,92                       |                | 2,36                       |
| 3582,75                    | 19,46                   |                             | N/A            | 2,66                       |                | 2,53                       | N/A             | 0,76                       |                | 0,60                       | N/A                | 1,67                       |                | 2,10                       | N/A               | 0,89                       |                | 1,05                       | N/A                  | 1,72                       |                | 0,49                       |
| 3583,63                    | 26,32                   | Collagen alpha-1(III) chain | N/A            | 2,01                       |                | 1,12                       | N/A             | 2,13                       |                | 1,60                       | N/A                | 0,64                       |                | 1,41                       | N/A               | 0,86                       |                | 0,81                       | N/A                  | 5,01                       |                | 8,35                       |
| 3593,47                    | 20,19                   | Collagen alpha-1(XI) chain  | N/A            | 1,15                       |                | 1,25                       | N/A             | 1,76                       |                | 1,65                       | N/A                | 0,79                       |                | 1,05                       | N/A               | 1,99                       |                | 0,76                       | N/A                  | 0,64                       |                | 0,48                       |
| 3618,67                    | 31,67                   | Collagen alpha-1(I) chain   | N/A            | 1,42                       |                | 1,40                       | N/A             | 1,55                       |                | 1,60                       | N/A                | 1,19                       |                | 1,18                       | N/A               | 1,42                       |                | 0,94                       | N/A                  | 1,07                       |                | 1,92                       |
| 3681,71                    | 31,87                   |                             | N/A            | 2,53                       |                | 1,46                       | N/A             | 1,63                       |                | 106,84                     | N/A                | 1,15                       |                | 2,45                       | N/A               | 1,04                       |                | 1,12                       | N/A                  | 1,26                       |                | 2,24                       |
| 3710,76                    | 19,57                   | Collagen alpha-1(XVI) chain | N/A            | 6,56                       |                | 1,63                       | N/A             | 1,23                       |                | 0,70                       | N/A                | 2,57                       |                | 2,71                       | N/A               | 0,73                       |                | 0,34                       | N/A                  | 2,37                       |                | 1,18                       |
| 3822,11                    | 24,81                   |                             | N/A            | 0,74                       |                | 0,57                       | N/A             | 0,42                       |                | 1,10                       | N/A                | 0,33                       |                | 0,26                       | N/A               | 0,53                       |                | 0,78                       | N/A                  | 0,54                       |                | 0,56                       |
| 3943,83                    | 33,54                   | Collagen alpha-1(III) chain | N/A            | 1,46                       |                | 1,01                       | N/A             | 1,38                       |                | 1,37                       | N/A                | 0,92                       |                | 0,72                       | n.s               | 0,71                       |                | 1,01                       | n.s                  | 1,37                       |                | 1,53                       |
| 4043,65                    | 20,16                   |                             | N/A            | 4,62                       |                | 0,94                       | N/A             | 0,91                       |                | 1,12                       | N/A                | 1,08                       |                | 0,21                       | N/A               | 0,79                       |                | 1,51                       | N/A                  | 1,93                       |                | 0,23                       |
| 4059,65                    | 20,38                   |                             | N/A            | 15,25                      |                | 1,28                       | N/A             | 3,39                       |                | 6,36                       | N/A                | 1,21                       |                | 0,48                       | N/A               | 0,93                       |                | 1,69                       | N/A                  | 1,96                       |                | 1,46                       |
| 4078,81                    | 33,06                   | Collagen alpha-3(IV) chain  | N/A            | 1,78                       |                | 1,84                       | N/A             | 2,59                       |                | 1,35                       | N/A                | 2,40                       |                | 1,70                       | N/A               | 0,54                       |                | 0,87                       | N/A                  | 3,09                       |                | 1,94                       |
| 4185,91                    | 33,60                   |                             | N/A            | 2,62                       |                | 2,12                       | N/A             | 1,32                       |                | 2,09                       | N/A                | 1,03                       |                | 0,73                       | N/A               | 0,70                       |                | 0,77                       | N/A                  | 2,08                       |                | 4,51                       |
| 4196,78                    | 20,85                   |                             | N/A            | 0,61                       |                | 0,27                       | N/A             | 1,21                       |                | 0,74                       | N/A                | 0,42                       |                | 0,39                       | N/A               | 1,11                       |                | 4,79                       | N/A                  | 0,71                       |                | 0,45                       |
| 4368,87                    | 20,21                   | Collagen alpha-1(XI) chain  | N/A            | 13,14                      |                | 1,25                       | N/A             | 2,49                       |                | 4,76                       | N/A                | 1,07                       |                | 0,56                       | N/A               | 1,63                       |                | 1,46                       | N/A                  | 2,51                       |                | 0,71                       |
| 4404,87                    | 20,59                   |                             | N/A            | 0,88                       |                | 0,42                       | n.s             | 0,85                       |                | 0,88                       | N/A                | 0,69                       |                | 0,36                       | N/A               | 0,86                       |                | 2,12                       | N/A                  | 0,71                       |                | 0,53                       |
| 4654,14                    | 25,78                   | Collagen alpha-1(III) chain | N/A            | 1,06                       |                | 1,09                       | N/A             | 0,77                       |                | 0,82                       | N/A                | 2,16                       |                | 1,20                       | N/A               | 1,01                       |                | 0,96                       | N/A                  | 1,78                       |                | 2,14                       |
| 4817,17                    | 23,74                   | Collagen alpha-1(II) chain  | N/A            | 5,32                       |                | 5,18                       | N/A             | 1,46                       |                | 23,21                      | N/A                | 1,76                       |                | 1,33                       | N/A               | 1,34                       |                | 0,49                       | N/A                  | 7,65                       |                | 33,99                      |
| 4833,16                    | 23,83                   | Collagen alpha-1(I) chain   | N/A            | 2,47                       |                | 6,54                       | N/A             | 2,74                       |                | 0,79                       | N/A                | 1,01                       |                | 2,43                       | N/A               | 1,06                       |                | 0,60                       | N/A                  | 9,27                       |                | 50,19                      |
| 4960,48                    | 20,57                   | Collagen alpha-1(II) chain  | N/A            | 1,16                       |                | 1,63                       | N/A             | 1,53                       |                | 0,56                       | N/A                | 9,51                       |                | 0,21                       | N/A               | 0,09                       |                | 0,29                       | N/A                  | 9,07                       |                | 0,56                       |
| 5510,35                    | 26,99                   |                             | n.s            | 0,66                       |                | 0,74                       | N/A             | 0,93                       |                | 1,26                       | 0,00               | 0,42                       |                | 0,37                       | 0,03              | 0,43                       |                | 0,55                       | N/A                  | 1,19                       |                | 1,09                       |
| 6211,71                    | 20,26                   |                             | N/A            | 0,99                       |                | 0,36                       | N/A             | 0,67                       |                | 0,80                       | N/A                | 0,08                       |                | 0,56                       | N/A               | 0,31                       |                | 0,08                       | N/A                  | 1,64                       |                | 0,34                       |
| 6236,85                    | 21,06                   |                             | 0,02           | 3,78                       |                | 2,28                       | N/A             | 1,47                       |                | 1,34                       | n.s                | 9,83                       |                | 0,97                       | n.s               | 0,94                       |                | 0,25                       | 0,01                 | 2,51                       |                | 4,20                       |
| 9882,83                    | 20,82                   |                             | N/A            | 4,60                       |                | 1,06                       | N/A             | 3,27                       |                | 9,10                       | N/A                | 0,62                       |                | 0,69                       | N/A               | 0,28                       |                | 0,07                       | N/A                  | 2,67                       |                | 1,11                       |
| 10999,63                   | 21,33                   |                             | N/A            | 1,40                       |                | 0,07                       | N/A             | 0,66                       |                | 1,01                       | N/A                | 0,66                       |                | 1,24                       | N/A               | 1,22                       |                | 1,43                       | N/A                  | 0,93                       |                | 0,36                       |

Abbreviations: CE-MS, Capillary Electrophoresis coupled to Mass Spectrometry; Da, Dalton; min, minutes; N/A

**Supplementary Table S3. Spreadsheet 1.** Distribution of the bladder cancer cohort.

| <b>Bca cases</b>             |                 |                  |      |
|------------------------------|-----------------|------------------|------|
|                              | Discovery Phase | Validation Phase | P    |
| Patients, n(%)               | 349 (64%)       | 138 (25%)        |      |
| Female/male, n/n             | 65/283          | 28/110           | 0.07 |
| Age, mean/range              | 67/28-95        | 69/27-87         | 0.05 |
| Stage, n(%)                  |                 |                  |      |
| pTa                          | 151             | 62               |      |
| pTis                         | 16              | 6                |      |
| pT1                          | 71              | 24               |      |
| pT2                          | 72              | 30               |      |
| pT3                          | 29              | 14               |      |
| pT4                          | 9               | 2                |      |
| No gender data available, n  | 1               |                  |      |
| No staging data available, n | 1               |                  |      |
| <b>Urological controls</b>   |                 |                  |      |
|                              | Discovery Phase | Validation Phase | P    |
| Patients, n(%)               | 35 (7%)         | 23 (4%)          |      |
| Female/male, n/n             | 4/31            | 8/15             | 0.05 |
| Age, mean/range              | 60/43-88        | 65/33-93         | 0.31 |

*Abbreviations: Bca, Bladder cancer; P, p-value*



**Supplementary Table S3. Spreadsheet 2.** Distribution of the prostate cancer cohort.

| <b>Prostate cancer cases</b>       |                 |                  |      |
|------------------------------------|-----------------|------------------|------|
|                                    | Discovery Phase | Validation Phase | P    |
| Patients, n (%)                    | 138 (36%)       | 68 (18%)         | 0.93 |
| Age, mean/range                    | 68 (41-87)      | 68 (45-86)       |      |
| Stage, n                           | 32              | 3                |      |
| pT1                                | 1               |                  |      |
| pT2                                | 9               | 1                |      |
| pT3                                | 15              | 2                |      |
| pT4                                | 7               |                  |      |
| No staging data available, n       | 106             | 65               |      |
| Gleason score                      |                 |                  |      |
| 6                                  | 12              | 5                |      |
| 7                                  | 28              | 16               |      |
| 8-10                               | 12              | 4                |      |
| No Gleason score data available, n | 86              | 43               |      |
| PSA level (ng/ml)                  | 38.8 (1.61-987) | 12.1 (1.2-136)   |      |
| No PSA level data available, n     | 13              | 5                |      |
| <b>BPH controls</b>                |                 |                  |      |
|                                    | Discovery Phase | Validation Phase | P    |
| Patients, n (%)                    | 130 (33%)       | 49 (13%)         | 0.61 |
| Age, mean/range                    | 66 (51-87)      | 66 (51-83)       |      |
| PSA level (ng/ml)                  | 13.1 (0.6-72.5) | 17.8 (3.05-384)  |      |
| No PSA level data available, n     | 13              | 6                |      |

*Abbreviations: BPH, Benign Prostatic Hyperplasia; PSA, prostate specific antigen; P, p-value*

**Supplementary Table S3. Spreadsheet 3.** Distribution of the pancreatic cancer cohort.

| <b>Pancreatic cancer cases</b>       |                    |                    |      |
|--------------------------------------|--------------------|--------------------|------|
|                                      | Discovery Phase    | Validation Phase   | P    |
| Patients, n(%)                       | 61 (%)             | 27 (25%)           |      |
| Female/male, n/n                     | 21/40              | 13/4               | 0.24 |
| Age, mean/range                      | 67/28-95           | 69/27-87           | 0.51 |
| CEA level                            | 33001 (1-575127.6) | 11515.5 (7-120931) |      |
| No CEA level data available, n       | 17                 | 8                  |      |
| CA19-9 level                         | 84.8 (1-1051)      | 7 (0-36)           |      |
| No CA19-9 level data available, n    | 27                 | 9                  |      |
| <b>Chronic pancreatitis controls</b> |                    |                    |      |
|                                      | Discovery Phase    | Validation Phase   | P    |
| Patients, n(%)                       | 62 (7%)            | 30 (4%)            |      |
| Female/male, n/n                     | 10/52              | 3/27               | 0.54 |
| Age, mean/range                      | 60/43-88           | 65/33-93           | 0.87 |
| CEA level                            | 5.2 (1-30)         | 8.5 (1-112)        |      |
| No CEA level data available, n       | 18                 | 8                  |      |
| CA19-9 level                         | 26.5 (1-598.7)     | 51.8 (0.6-363)     |      |
| No CA19-9 level data available, n    | 17                 | 8                  |      |

*Abbreviations: CEA, carcinoembryonic antigen; CA19-9, carbohydrate antigen 19-9; P, p-value*

**Supplementary Table S3. Spreadsheet 4.** Distribution of the renal cell carcinoma cohort.

| <b>RCC cases</b>             |                 |                  |      |
|------------------------------|-----------------|------------------|------|
|                              | Discovery Phase | Validation Phase | P    |
| Patients, n(%)               | 46 (26%)        | 24 (14%)         |      |
| Female/male, n/n             | 16/30           | 9/15             | 1    |
| Age, mean/range              | 62/41-81        | 61/33-79         | 0.87 |
| Stage, n (%)                 |                 |                  |      |
| pT1                          | 18              | 3                |      |
| pT2                          | 8               |                  |      |
| pT3                          | 12              | 1                |      |
| No staging data available, n | 8               | 20               |      |
| <b>RCC control</b>           |                 |                  |      |
|                              | Discovery Phase | Validation Phase | P    |
| Patients, n(%)               | 80 (46%)        | 25 (14%)         |      |
| Female/male, n/n             | 22/35           | 11/14            | 0.81 |
| Age, mean/range              | 58/23-84        | 59/28-80         | 0.94 |
| No gender data available, n  | 23              |                  |      |

*Abbreviations: RCC, Renal Cell Carcinoma; P, p-value*

**Supplementary Table S3. Spreadsheet 5.** Distribution of the cholangiocarcinoma cohort.

| <b>CC cases</b>                      |                 |                  |      |
|--------------------------------------|-----------------|------------------|------|
|                                      | Discovery Phase | Validation Phase | P    |
| Patients, n(%)                       | 82 (%)          | 36 (%)           |      |
| Female/male, n/n                     | 32/49           | 11/25            | 0.41 |
| No gender data available, n          | 1               |                  |      |
| Age, mean/range                      | 61/22-81        | 58/30-86         | 0.49 |
| <b>Chronic pancreatitis controls</b> |                 |                  |      |
|                                      | Discovery Phase | Validation Phase | P    |
| Patients, n(%)                       | 83 (7%)         | 39 (4%)          |      |
| Female/male, n/n                     | 29/52           | 15/24            | 0.84 |
| No gender data available, n          | 2               |                  |      |
| Age, mean/range                      | 48/20-83        | 50/22-85         | 0.45 |

*Abbreviations: CC, Cholangiocarcinoma; P, p-value*

**Supplementary Table S3. Spreadsheet 6.** Distribution of the control set of health individuals.

|                   | <b>Healthy Individuals</b> |                  |      |
|-------------------|----------------------------|------------------|------|
|                   | Discovery Phase            | Validation Phase | P    |
| Patients, n(%)    | 167 (51%)                  | 89 (27%)         |      |
| Female/male, n/n  | 90/77                      | 48/41            | 1.0  |
| Age, mean (range) | 60 (19-86)                 | 60 (22-86)       | 0.75 |

  

|                   | <b>Individuals with smoking history</b> |                  |      |
|-------------------|-----------------------------------------|------------------|------|
|                   | Discovery Phase                         | Validation Phase | P    |
| Patients, n(%)    | 51(15%)                                 | 24 (7%)          |      |
| Female/male, n/n  | 28/23                                   | 13/11            | 1.0  |
| Age, mean (range) | 43 (19-72)                              | 46 (20-72)       | 0.55 |

**Supplementary Table S3. Spreadsheet 7.** Distribution of the control set of patients with inflammatory diseases.

|                   | <b>Inflammatory diseases</b> |                  | P    |
|-------------------|------------------------------|------------------|------|
|                   | Discovery Phase              | Validation Phase |      |
| Patients, n(%)    | 136                          | 63               |      |
| Female/male, n/n  | 79/57                        | 40/23            | 0.54 |
| Age, mean (range) | 46 (19-88)                   | 47 (19-78)       | 0.93 |

**Supplementary Table S3. Spreadsheet 8.** Distribution of the independent control set of patients with inflammatory diseases.

| <b>Independent specificity phase</b> |            |
|--------------------------------------|------------|
| HV                                   |            |
| Patients, n(%)                       | 58 (63%)   |
| Female/male, n/n                     | 16/3       |
| No gender data available, n          | 39         |
| Age, mean (range)                    | 30 (19-47) |
| SLE                                  |            |
| Patients, n(%)                       | 34 (37%)   |
| Female/male, n/n                     | 16/2       |
| No gender data available, n          | 16         |
| Age, mean (range)                    | 42 (27-63) |

*Abbreviations: HV, Hypersensitivity vasculitis; SLE, Systemic Lupus erythematosus*

**Supplementary Table S3. Spreadsheet 9.** Distribution of the additional set of patients with other tumor types.

**Additional Validation Phase**

| AML               |            |
|-------------------|------------|
| Patients, n(%)    | 27 (63%)   |
| Female/male, n/n  | 13/14      |
| Age, mean (range) | 50 (17-70) |

  

| Other tumors      |            |
|-------------------|------------|
| Patients, n(%)    | 13 (37%)   |
| Female/male, n/n  | 7/6        |
| Age, mean (range) | 52 (33-74) |

*Abbreviations: AML, Acute Myeloid Leukemia*



**Supplementary Table S4. Spreadsheet 1.** Clinical and demographical data of the bladder cancer cohort (n=545).

| CE-MS Analysis ID | Diagnosis          | Stage | Age | Gender | Analytical Phase         |
|-------------------|--------------------|-------|-----|--------|--------------------------|
| 20877             | Urological Control |       | 51  | Female | Training/Discovery Phase |
| 80120             | Urological Control |       | 52  | Female | Training/Discovery Phase |
| 18236             | Urological Control |       | 56  | Female | Training/Discovery Phase |
| 85255             | Urological Control |       | 77  | Female | Training/Discovery Phase |
| 78461             | Urological Control |       | 43  | Male   | Training/Discovery Phase |
| 80338             | Urological Control |       | 46  | Male   | Training/Discovery Phase |
| 21479             | Urological Control |       | 48  | Male   | Training/Discovery Phase |
| 20977             | Urological Control |       | 49  | Male   | Training/Discovery Phase |
| 82784             | Urological Control |       | 50  | Male   | Training/Discovery Phase |
| 19851             | Urological Control |       | 51  | Male   | Training/Discovery Phase |
| 21503             | Urological Control |       | 52  | Male   | Training/Discovery Phase |
| 21530             | Urological Control |       | 52  | Male   | Training/Discovery Phase |
| 19875             | Urological Control |       | 54  | Male   | Training/Discovery Phase |
| 21502             | Urological Control |       | 54  | Male   | Training/Discovery Phase |
| 81353             | Urological Control |       | 54  | Male   | Training/Discovery Phase |
| 19864             | Urological Control |       | 57  | Male   | Training/Discovery Phase |
| 19841             | Urological Control |       | 58  | Male   | Training/Discovery Phase |
| 27154             | Urological Control |       | 59  | Male   | Training/Discovery Phase |
| 27363             | Urological Control |       | 59  | Male   | Training/Discovery Phase |
| 19866             | Urological Control |       | 61  | Male   | Training/Discovery Phase |
| 19916             | Urological Control |       | 61  | Male   | Training/Discovery Phase |
| 21736             | Urological Control |       | 61  | Male   | Training/Discovery Phase |
| 27188             | Urological Control |       | 61  | Male   | Training/Discovery Phase |
| 81677             | Urological Control |       | 61  | Male   | Training/Discovery Phase |
| 19897             | Urological Control |       | 62  | Male   | Training/Discovery Phase |
| 80730             | Urological Control |       | 64  | Male   | Training/Discovery Phase |
| 21739             | Urological Control |       | 68  | Male   | Training/Discovery Phase |
| 82625             | Urological Control |       | 68  | Male   | Training/Discovery Phase |
| 19854             | Urological Control |       | 69  | Male   | Training/Discovery Phase |
| 82606             | Urological Control |       | 71  | Male   | Training/Discovery Phase |
| 85367             | Urological Control |       | 71  | Male   | Training/Discovery Phase |
| 19850             | Urological Control |       | 73  | Male   | Training/Discovery Phase |
| 19842             | Urological Control |       | 74  | Male   | Training/Discovery Phase |
| 19853             | Urological Control |       | 78  | Male   | Training/Discovery Phase |
| 20881             | Urological Control |       | 88  | Male   | Training/Discovery Phase |
| 85309             | Bca case           | pT2   | 28  | Female | Training/Discovery Phase |
| 27713             | Bca case           | pTa   | 39  | Female | Training/Discovery Phase |
| 85736             | Bca case           | pTa   | 43  | Female | Training/Discovery Phase |
| 87823             | Bca case           | pT3   | 47  | Female | Training/Discovery Phase |
| 21480             | Bca case           | pTa   | 47  | Female | Training/Discovery Phase |
| 22109             | Bca case           | pTa   | 47  | Female | Training/Discovery Phase |
| 81569             | Bca case           | pTis  | 48  | Female | Training/Discovery Phase |
| 82118             | Bca case           | pT3   | 51  | Female | Training/Discovery Phase |
| 26639             | Bca case           | pTa   | 57  | Female | Training/Discovery Phase |
| 88142             | Bca case           | pTa   | 57  | Female | Training/Discovery Phase |
| 27080             | Bca case           | pTis  | 59  | Female | Training/Discovery Phase |

| CE-MS Analysis ID | Diagnosis | Stage | Age | Gender | Analytical Phase         |
|-------------------|-----------|-------|-----|--------|--------------------------|
| 27169             | Bca case  | pT4   | 60  | Female | Training/Discovery Phase |
| 88118             | Bca case  | pTa   | 60  | Female | Training/Discovery Phase |
| 88119             | Bca case  | pTa   | 60  | Female | Training/Discovery Phase |
| 88100             | Bca case  | pT1   | 61  | Female | Training/Discovery Phase |
| 87744             | Bca case  | pT3   | 61  | Female | Training/Discovery Phase |
| 18755             | Bca case  | pTa   | 61  | Female | Training/Discovery Phase |
| 85244             | Bca case  | pTa   | 61  | Female | Training/Discovery Phase |
| 87738             | Bca case  | pT2   | 62  | Female | Training/Discovery Phase |
| 19845             | Bca case  | pTa   | 62  | Female | Training/Discovery Phase |
| 27694             | Bca case  | pTa   | 63  | Female | Training/Discovery Phase |
| 88110             | Bca case  | pTa   | 63  | Female | Training/Discovery Phase |
| 32555             | Bca case  | pT2   | 64  | Female | Training/Discovery Phase |
| 87893             | Bca case  | pT2   | 64  | Female | Training/Discovery Phase |
| 87728             | Bca case  | pT4   | 64  | Female | Training/Discovery Phase |
| 19871             | Bca case  | pTa   | 64  | Female | Training/Discovery Phase |
| 22024             | Bca case  | pT1   | 65  | Female | Training/Discovery Phase |
| 27691             | Bca case  | pTa   | 66  | Female | Training/Discovery Phase |
| 18852             | Bca case  | pT1   | 68  | Female | Training/Discovery Phase |
| 87854             | Bca case  | pT3   | 68  | Female | Training/Discovery Phase |
| 82330             | Bca case  | pTa   | 68  | Female | Training/Discovery Phase |
| 84989             | Bca case  | pTa   | 68  | Female | Training/Discovery Phase |
| 87821             | Bca case  | pT3   | 69  | Female | Training/Discovery Phase |
| 87216             | Bca case  | pTa   | 69  | Female | Training/Discovery Phase |
| 88128             | Bca case  | pTa   | 69  | Female | Training/Discovery Phase |
| 27182             | Bca case  | pT2   | 70  | Female | Training/Discovery Phase |
| 27083             | Bca case  | pT3   | 71  | Female | Training/Discovery Phase |
| 86607             | Bca case  | pT1   | 72  | Female | Training/Discovery Phase |
| 88046             | Bca case  | pT3   | 74  | Female | Training/Discovery Phase |
| 27088             | Bca case  | pTis  | 74  | Female | Training/Discovery Phase |
| 82099             | Bca case  | pT2   | 75  | Female | Training/Discovery Phase |
| 84957             | Bca case  | pT1   | 76  | Female | Training/Discovery Phase |
| 86373             | Bca case  | pT2   | 76  | Female | Training/Discovery Phase |
| 87736             | Bca case  | pT3   | 76  | Female | Training/Discovery Phase |
| 27692             | Bca case  | pTa   | 76  | Female | Training/Discovery Phase |
| 86209             | Bca case  | pTa   | 76  | Female | Training/Discovery Phase |
| 88113             | Bca case  | pTa   | 76  | Female | Training/Discovery Phase |
| 88145             | Bca case  | pTa   | 76  | Female | Training/Discovery Phase |
| 27077             | Bca case  | pT3   | 77  | Female | Training/Discovery Phase |
| 86712             | Bca case  | pTa   | 77  | Female | Training/Discovery Phase |
| 80735             | Bca case  | pTa   | 78  | Female | Training/Discovery Phase |
| 88127             | Bca case  | pT1   | 79  | Female | Training/Discovery Phase |
| 88146             | Bca case  | pT1   | 80  | Female | Training/Discovery Phase |
| 27551             | Bca case  | pT1   | 81  | Female | Training/Discovery Phase |
| 86573             | Bca case  | pT1   | 81  | Female | Training/Discovery Phase |
| 85025             | Bca case  | pT2   | 81  | Female | Training/Discovery Phase |
| 87743             | Bca case  | pT3   | 81  | Female | Training/Discovery Phase |
| 84966             | Bca case  | pTa   | 81  | Female | Training/Discovery Phase |
| 86210             | Bca case  | pT1   | 82  | Female | Training/Discovery Phase |
| 27068             | Bca case  | pT3   | 82  | Female | Training/Discovery Phase |

| CE-MS Analysis ID | Diagnosis | Stage | Age | Gender | Analytical Phase         |
|-------------------|-----------|-------|-----|--------|--------------------------|
| 22025             | Bca case  | pT1   | 83  | Female | Training/Discovery Phase |
| 85083             | Bca case  | pT1   | 83  | Female | Training/Discovery Phase |
| 80339             | Bca case  | pT2   | 85  | Female | Training/Discovery Phase |
| 82121             | Bca case  | pT2   | 86  | Female | Training/Discovery Phase |
| 85154             | Bca case  | pT2   | 86  | Female | Training/Discovery Phase |
| 85233             | Bca case  | pTa   | 35  | Male   | Training/Discovery Phase |
| 27069             | Bca case  | pT3   | 38  | Male   | Training/Discovery Phase |
| 18363             | Bca case  | pT2   | 40  | Male   | Training/Discovery Phase |
| 87730             | Bca case  | pT2   | 40  | Male   | Training/Discovery Phase |
| 85304             | Bca case  | pTa   | 40  | Male   | Training/Discovery Phase |
| 85573             | Bca case  | pTa   | 40  | Male   | Training/Discovery Phase |
| 87857             | Bca case  | pT2   | 41  | Male   | Training/Discovery Phase |
| 27190             | Bca case  | pTa   | 41  | Male   | Training/Discovery Phase |
| 87752             | Bca case  | pTis  | 41  | Male   | Training/Discovery Phase |
| 88045             | Bca case  | pTis  | 41  | Male   | Training/Discovery Phase |
| 85012             | Bca case  | pT1   | 42  | Male   | Training/Discovery Phase |
| 87774             | Bca case  | pT2   | 43  | Male   | Training/Discovery Phase |
| 85194             | Bca case  | pT1   | 46  | Male   | Training/Discovery Phase |
| 27364             | Bca case  | pTa   | 46  | Male   | Training/Discovery Phase |
| 88114             | Bca case  | pTa   | 46  | Male   | Training/Discovery Phase |
| 88104             | Bca case  | pTis  | 46  | Male   | Training/Discovery Phase |
| 85235             | Bca case  | pT1   | 47  | Male   | Training/Discovery Phase |
| 81348             | Bca case  | pTa   | 47  | Male   | Training/Discovery Phase |
| 82340             | Bca case  | pTa   | 47  | Male   | Training/Discovery Phase |
| 85813             | Bca case  | pTa   | 47  | Male   | Training/Discovery Phase |
| 86611             | Bca case  | pTa   | 47  | Male   | Training/Discovery Phase |
| 69658             | Bca case  | pT4   | 48  | Male   | Training/Discovery Phase |
| 22020             | Bca case  | pT3   | 49  | Male   | Training/Discovery Phase |
| 87860             | Bca case  | pT3   | 49  | Male   | Training/Discovery Phase |
| 21961             | Bca case  | pT4   | 49  | Male   | Training/Discovery Phase |
| 87780             | Bca case  | pT2   | 50  | Male   | Training/Discovery Phase |
| 84970             | Bca case  | pTa   | 50  | Male   | Training/Discovery Phase |
| 85989             | Bca case  | pTa   | 50  | Male   | Training/Discovery Phase |
| 86241             | Bca case  | pTa   | 50  | Male   | Training/Discovery Phase |
| 87775             | Bca case  | pT3   | 51  | Male   | Training/Discovery Phase |
| 86203             | Bca case  | pTa   | 51  | Male   | Training/Discovery Phase |
| 87885             | Bca case  | pT2   | 52  | Male   | Training/Discovery Phase |
| 88136             | Bca case  | pT2   | 52  | Male   | Training/Discovery Phase |
| 87827             | Bca case  | pT3   | 52  | Male   | Training/Discovery Phase |
| 20540             | Bca case  | pTa   | 52  | Male   | Training/Discovery Phase |
| 27963             | Bca case  | pTa   | 52  | Male   | Training/Discovery Phase |
| 86804             | Bca case  | pTa   | 52  | Male   | Training/Discovery Phase |
| 86805             | Bca case  | pTa   | 52  | Male   | Training/Discovery Phase |
| 85838             | Bca case  | pT1   | 53  | Male   | Training/Discovery Phase |
| 86422             | Bca case  | pT2   | 53  | Male   | Training/Discovery Phase |
| 20733             | Bca case  | pTa   | 53  | Male   | Training/Discovery Phase |
| 27965             | Bca case  | pTa   | 53  | Male   | Training/Discovery Phase |
| 86806             | Bca case  | pTa   | 53  | Male   | Training/Discovery Phase |

| CE-MS Analysis ID | Diagnosis | Stage | Age | Gender | Analytical Phase         |
|-------------------|-----------|-------|-----|--------|--------------------------|
| 87727             | Bca case  | pT2   | 54  | Male   | Training/Discovery Phase |
| 87886             | Bca case  | pT3   | 54  | Male   | Training/Discovery Phase |
| 85198             | Bca case  | pTa   | 54  | Male   | Training/Discovery Phase |
| 86706             | Bca case  | pTa   | 54  | Male   | Training/Discovery Phase |
| 85234             | Bca case  | pT1   | 55  | Male   | Training/Discovery Phase |
| 88102             | Bca case  | pT1   | 55  | Male   | Training/Discovery Phase |
| 18237             | Bca case  | pT2   | 55  | Male   | Training/Discovery Phase |
| 27067             | Bca case  | pT2   | 55  | Male   | Training/Discovery Phase |
| 87749             | Bca case  | pT2   | 55  | Male   | Training/Discovery Phase |
| 19961             | Bca case  | pTa   | 55  | Male   | Training/Discovery Phase |
| 80963             | Bca case  | pTa   | 55  | Male   | Training/Discovery Phase |
| 86589             | Bca case  | pT1   | 56  | Male   | Training/Discovery Phase |
| 85918             | Bca case  | pTa   | 56  | Male   | Training/Discovery Phase |
| 87856             | Bca case  | pTis  | 56  | Male   | Training/Discovery Phase |
| 88144             | Bca case  | pTis  | 56  | Male   | Training/Discovery Phase |
| 86707             | Bca case  | pT2   | 57  | Male   | Training/Discovery Phase |
| 87859             | Bca case  | pT2   | 57  | Male   | Training/Discovery Phase |
| 78478             | Bca case  | pTa   | 57  | Male   | Training/Discovery Phase |
| 81038             | Bca case  | pTa   | 57  | Male   | Training/Discovery Phase |
| 81041             | Bca case  | pTa   | 57  | Male   | Training/Discovery Phase |
| 82106             | Bca case  | pTa   | 57  | Male   | Training/Discovery Phase |
| 85820             | Bca case  | pTa   | 57  | Male   | Training/Discovery Phase |
| 85943             | Bca case  | pTa   | 57  | Male   | Training/Discovery Phase |
| 20966             | Bca case  | pTa   | 58  | Male   | Training/Discovery Phase |
| 85200             | Bca case  | pTa   | 58  | Male   | Training/Discovery Phase |
| 86709             | Bca case  | pTa   | 58  | Male   | Training/Discovery Phase |
| 27356             | Bca case  | pT1   | 59  | Male   | Training/Discovery Phase |
| 27149             | Bca case  | pT3   | 59  | Male   | Training/Discovery Phase |
| 28580             | Bca case  | pTa   | 59  | Male   | Training/Discovery Phase |
| 84963             | Bca case  | pTa   | 59  | Male   | Training/Discovery Phase |
| 85944             | Bca case  | pT1   | 60  | Male   | Training/Discovery Phase |
| 86037             | Bca case  | pT1   | 60  | Male   | Training/Discovery Phase |
| 86704             | Bca case  | pT1   | 60  | Male   | Training/Discovery Phase |
| 27086             | Bca case  | pT3   | 60  | Male   | Training/Discovery Phase |
| 18746             | Bca case  | pTa   | 60  | Male   | Training/Discovery Phase |
| 19868             | Bca case  | pTa   | 60  | Male   | Training/Discovery Phase |
| 27964             | Bca case  | pTa   | 60  | Male   | Training/Discovery Phase |
| 80662             | Bca case  | pTa   | 60  | Male   | Training/Discovery Phase |
| 80700             | Bca case  | pTa   | 60  | Male   | Training/Discovery Phase |
| 85027             | Bca case  | pTa   | 60  | Male   | Training/Discovery Phase |
| 88129             | Bca case  | pTa   | 60  | Male   | Training/Discovery Phase |
| 80320             | Bca case  | pT2   | 61  | Male   | Training/Discovery Phase |
| 87149             | Bca case  | pT2   | 61  | Male   | Training/Discovery Phase |
| 87746             | Bca case  | pT2   | 61  | Male   | Training/Discovery Phase |
| 88050             | Bca case  | pT4   | 61  | Male   | Training/Discovery Phase |
| 80119             | Bca case  | pTa   | 61  | Male   | Training/Discovery Phase |
| 88101             | Bca case  | pTa   | 61  | Male   | Training/Discovery Phase |
| 19869             | Bca case  | pT3   | 62  | Male   | Training/Discovery Phase |
| 78448             | Bca case  | pTa   | 62  | Male   | Training/Discovery Phase |

| CE-MS Analysis ID | Diagnosis | Stage | Age | Gender | Analytical Phase         |
|-------------------|-----------|-------|-----|--------|--------------------------|
| 78465             | Bca case  | pTa   | 62  | Male   | Training/Discovery Phase |
| 78528             | Bca case  | pTa   | 62  | Male   | Training/Discovery Phase |
| 87819             | Bca case  | pT2   | 63  | Male   | Training/Discovery Phase |
| 85993             | Bca case  | pT4   | 63  | Male   | Training/Discovery Phase |
| 20690             | Bca case  | pTa   | 63  | Male   | Training/Discovery Phase |
| 87316             | Bca case  | pTa   | 63  | Male   | Training/Discovery Phase |
| 88112             | Bca case  | pTa   | 63  | Male   | Training/Discovery Phase |
| 88105             | Bca case  | pTis  | 63  | Male   | Training/Discovery Phase |
| 88130             | Bca case  | pTis  | 63  | Male   | Training/Discovery Phase |
| 86375             | Bca case  | pT1   | 64  | Male   | Training/Discovery Phase |
| 87858             | Bca case  | pT2   | 64  | Male   | Training/Discovery Phase |
| 88132             | Bca case  | pT2   | 64  | Male   | Training/Discovery Phase |
| 84973             | Bca case  | pTa   | 64  | Male   | Training/Discovery Phase |
| 85013             | Bca case  | pTa   | 64  | Male   | Training/Discovery Phase |
| 85315             | Bca case  | pTa   | 64  | Male   | Training/Discovery Phase |
| 85815             | Bca case  | pTa   | 64  | Male   | Training/Discovery Phase |
| 87862             | Bca case  | pTis  | 64  | Male   | Training/Discovery Phase |
| 82795             | Bca case  | pT1   | 65  | Male   | Training/Discovery Phase |
| 19867             | Bca case  | pT2   | 65  | Male   | Training/Discovery Phase |
| 27179             | Bca case  | pT2   | 65  | Male   | Training/Discovery Phase |
| 27207             | Bca case  | pT2   | 65  | Male   | Training/Discovery Phase |
| 82516             | Bca case  | pT2   | 65  | Male   | Training/Discovery Phase |
| 82599             | Bca case  | pT2   | 65  | Male   | Training/Discovery Phase |
| 27072             | Bca case  | pT4   | 65  | Male   | Training/Discovery Phase |
| 82562             | Bca case  | pTa   | 65  | Male   | Training/Discovery Phase |
| 85078             | Bca case  | pTa   | 65  | Male   | Training/Discovery Phase |
| 86429             | Bca case  | pTa   | 65  | Male   | Training/Discovery Phase |
| 82724             | Bca case  |       | 65  | Male   | Training/Discovery Phase |
| 27645             | Bca case  | pT1   | 66  | Male   | Training/Discovery Phase |
| 85942             | Bca case  | pT1   | 66  | Male   | Training/Discovery Phase |
| 86717             | Bca case  | pT1   | 66  | Male   | Training/Discovery Phase |
| 82556             | Bca case  | pT2   | 66  | Male   | Training/Discovery Phase |
| 21842             | Bca case  | pTa   | 66  | Male   | Training/Discovery Phase |
| 82602             | Bca case  | pTa   | 66  | Male   | Training/Discovery Phase |
| 82718             | Bca case  | pTa   | 66  | Male   | Training/Discovery Phase |
| 84960             | Bca case  | pTa   | 66  | Male   | Training/Discovery Phase |
| 88116             | Bca case  | pTa   | 66  | Male   | Training/Discovery Phase |
| 27948             | Bca case  | pT1   | 67  | Male   | Training/Discovery Phase |
| 27954             | Bca case  | pT1   | 67  | Male   | Training/Discovery Phase |
| 27957             | Bca case  | pT1   | 67  | Male   | Training/Discovery Phase |
| 82367             | Bca case  | pT1   | 67  | Male   | Training/Discovery Phase |
| 84987             | Bca case  | pT1   | 67  | Male   | Training/Discovery Phase |
| 88106             | Bca case  | pT1   | 67  | Male   | Training/Discovery Phase |
| 88111             | Bca case  | pT1   | 67  | Male   | Training/Discovery Phase |
| 88139             | Bca case  | pT1   | 67  | Male   | Training/Discovery Phase |
| 23543             | Bca case  | pT3   | 67  | Male   | Training/Discovery Phase |
| 82318             | Bca case  | pTa   | 67  | Male   | Training/Discovery Phase |
| 85020             | Bca case  | pTa   | 67  | Male   | Training/Discovery Phase |
| 88107             | Bca case  | pTa   | 67  | Male   | Training/Discovery Phase |

| CE-MS Analysis ID | Diagnosis | Stage | Age | Gender | Analytical Phase         |
|-------------------|-----------|-------|-----|--------|--------------------------|
| 88117             | Bca case  | pTa   | 67  | Male   | Training/Discovery Phase |
| 88134             | Bca case  | pTa   | 67  | Male   | Training/Discovery Phase |
| 86812             | Bca case  | pTis  | 67  | Male   | Training/Discovery Phase |
| 19900             | Bca case  | pTa   | 68  | Male   | Training/Discovery Phase |
| 28015             | Bca case  | pTa   | 68  | Male   | Training/Discovery Phase |
| 85023             | Bca case  | pTis  | 68  | Male   | Training/Discovery Phase |
| 27966             | Bca case  | pT1   | 69  | Male   | Training/Discovery Phase |
| 84954             | Bca case  | pT1   | 69  | Male   | Training/Discovery Phase |
| 85937             | Bca case  | pT1   | 69  | Male   | Training/Discovery Phase |
| 85811             | Bca case  | pT2   | 69  | Male   | Training/Discovery Phase |
| 87729             | Bca case  | pT3   | 69  | Male   | Training/Discovery Phase |
| 87735             | Bca case  | pT3   | 69  | Male   | Training/Discovery Phase |
| 87745             | Bca case  | pT3   | 69  | Male   | Training/Discovery Phase |
| 81694             | Bca case  | pTa   | 69  | Male   | Training/Discovery Phase |
| 87114             | Bca case  | pTa   | 69  | Male   | Training/Discovery Phase |
| 22016             | Bca case  | pT1   | 70  | Male   | Training/Discovery Phase |
| 27534             | Bca case  | pT1   | 70  | Male   | Training/Discovery Phase |
| 27712             | Bca case  | pT1   | 70  | Male   | Training/Discovery Phase |
| 87281             | Bca case  | pT1   | 70  | Male   | Training/Discovery Phase |
| 69848             | Bca case  | pT2   | 70  | Male   | Training/Discovery Phase |
| 87737             | Bca case  | pT3   | 70  | Male   | Training/Discovery Phase |
| 26566             | Bca case  | pTa   | 70  | Male   | Training/Discovery Phase |
| 86710             | Bca case  | pT1   | 71  | Male   | Training/Discovery Phase |
| 19852             | Bca case  | pT2   | 71  | Male   | Training/Discovery Phase |
| 78373             | Bca case  | pT2   | 71  | Male   | Training/Discovery Phase |
| 81330             | Bca case  | pT2   | 71  | Male   | Training/Discovery Phase |
| 81349             | Bca case  | pT2   | 71  | Male   | Training/Discovery Phase |
| 85844             | Bca case  | pT2   | 71  | Male   | Training/Discovery Phase |
| 87892             | Bca case  | pT2   | 71  | Male   | Training/Discovery Phase |
| 87889             | Bca case  | pT3   | 71  | Male   | Training/Discovery Phase |
| 85848             | Bca case  | pTa   | 71  | Male   | Training/Discovery Phase |
| 81601             | Bca case  | pTis  | 71  | Male   | Training/Discovery Phase |
| 87740             | Bca case  | pT2   | 72  | Male   | Training/Discovery Phase |
| 27553             | Bca case  | pTa   | 72  | Male   | Training/Discovery Phase |
| 80955             | Bca case  | pTa   | 72  | Male   | Training/Discovery Phase |
| 81355             | Bca case  | pTa   | 72  | Male   | Training/Discovery Phase |
| 84965             | Bca case  | pTa   | 72  | Male   | Training/Discovery Phase |
| 85816             | Bca case  | pTa   | 72  | Male   | Training/Discovery Phase |
| 87116             | Bca case  | pTa   | 72  | Male   | Training/Discovery Phase |
| 85817             | Bca case  | pT1   | 73  | Male   | Training/Discovery Phase |
| 85931             | Bca case  | pT1   | 73  | Male   | Training/Discovery Phase |
| 87731             | Bca case  | pT2   | 73  | Male   | Training/Discovery Phase |
| 87742             | Bca case  | pT4   | 73  | Male   | Training/Discovery Phase |
| 85991             | Bca case  | pTa   | 73  | Male   | Training/Discovery Phase |
| 86605             | Bca case  | pTa   | 73  | Male   | Training/Discovery Phase |
| 81322             | Bca case  | pT1   | 74  | Male   | Training/Discovery Phase |
| 21985             | Bca case  | pT2   | 74  | Male   | Training/Discovery Phase |
| 85161             | Bca case  | pT2   | 74  | Male   | Training/Discovery Phase |
| 78111             | Bca case  | pTa   | 74  | Male   | Training/Discovery Phase |

| CE-MS Analysis ID | Diagnosis | Stage | Age | Gender | Analytical Phase         |
|-------------------|-----------|-------|-----|--------|--------------------------|
| 80810             | Bca case  | pTa   | 74  | Male   | Training/Discovery Phase |
| 81593             | Bca case  | pTa   | 74  | Male   | Training/Discovery Phase |
| 82305             | Bca case  | pTa   | 74  | Male   | Training/Discovery Phase |
| 85941             | Bca case  | pTa   | 74  | Male   | Training/Discovery Phase |
| 86714             | Bca case  | pTa   | 74  | Male   | Training/Discovery Phase |
| 87865             | Bca case  | pT1   | 75  | Male   | Training/Discovery Phase |
| 27070             | Bca case  | pT2   | 75  | Male   | Training/Discovery Phase |
| 27209             | Bca case  | pT2   | 75  | Male   | Training/Discovery Phase |
| 81046             | Bca case  | pT2   | 75  | Male   | Training/Discovery Phase |
| 19843             | Bca case  | pT3   | 75  | Male   | Training/Discovery Phase |
| 82109             | Bca case  | pTa   | 75  | Male   | Training/Discovery Phase |
| 84981             | Bca case  | pTa   | 75  | Male   | Training/Discovery Phase |
| 86713             | Bca case  | pTa   | 75  | Male   | Training/Discovery Phase |
| 88108             | Bca case  | pTa   | 75  | Male   | Training/Discovery Phase |
| 84964             | Bca case  | pT1   | 76  | Male   | Training/Discovery Phase |
| 86718             | Bca case  | pT1   | 76  | Male   | Training/Discovery Phase |
| 87747             | Bca case  | pT1   | 76  | Male   | Training/Discovery Phase |
| 87890             | Bca case  | pT1   | 76  | Male   | Training/Discovery Phase |
| 88150             | Bca case  | pT1   | 76  | Male   | Training/Discovery Phase |
| 18383             | Bca case  | pT2   | 76  | Male   | Training/Discovery Phase |
| 27064             | Bca case  | pT2   | 76  | Male   | Training/Discovery Phase |
| 84977             | Bca case  | pT2   | 76  | Male   | Training/Discovery Phase |
| 87118             | Bca case  | pT2   | 76  | Male   | Training/Discovery Phase |
| 87773             | Bca case  | pT2   | 76  | Male   | Training/Discovery Phase |
| 87831             | Bca case  | pT2   | 76  | Male   | Training/Discovery Phase |
| 87778             | Bca case  | pT4   | 76  | Male   | Training/Discovery Phase |
| 19874             | Bca case  | pTa   | 76  | Male   | Training/Discovery Phase |
| 27962             | Bca case  | pTa   | 76  | Male   | Training/Discovery Phase |
| 82094             | Bca case  | pTa   | 76  | Male   | Training/Discovery Phase |
| 85236             | Bca case  | pTa   | 76  | Male   | Training/Discovery Phase |
| 85814             | Bca case  | pTa   | 76  | Male   | Training/Discovery Phase |
| 86808             | Bca case  | pTa   | 76  | Male   | Training/Discovery Phase |
| 86613             | Bca case  | pT1   | 77  | Male   | Training/Discovery Phase |
| 69666             | Bca case  | pT2   | 77  | Male   | Training/Discovery Phase |
| 81363             | Bca case  | pT2   | 77  | Male   | Training/Discovery Phase |
| 86608             | Bca case  | pT2   | 77  | Male   | Training/Discovery Phase |
| 87280             | Bca case  | pT2   | 77  | Male   | Training/Discovery Phase |
| 21975             | Bca case  | pT3   | 77  | Male   | Training/Discovery Phase |
| 27443             | Bca case  | pTa   | 77  | Male   | Training/Discovery Phase |
| 82310             | Bca case  | pTa   | 77  | Male   | Training/Discovery Phase |
| 88125             | Bca case  | pTa   | 77  | Male   | Training/Discovery Phase |
| 86211             | Bca case  | pT2   | 78  | Male   | Training/Discovery Phase |
| 86363             | Bca case  | pTa   | 78  | Male   | Training/Discovery Phase |
| 86810             | Bca case  | pTa   | 78  | Male   | Training/Discovery Phase |
| 87217             | Bca case  | pTa   | 78  | Male   | Training/Discovery Phase |
| 88133             | Bca case  | pTa   | 78  | Male   | Training/Discovery Phase |
| 84980             | Bca case  | pT1   | 79  | Male   | Training/Discovery Phase |
| 86588             | Bca case  | pT1   | 79  | Male   | Training/Discovery Phase |
| 80619             | Bca case  | pTa   | 79  | Male   | Training/Discovery Phase |

| CE-MS Analysis ID | Diagnosis          | Stage | Age | Gender | Analytical Phase         |
|-------------------|--------------------|-------|-----|--------|--------------------------|
| 85990             | Bca case           | pTa   | 79  | Male   | Training/Discovery Phase |
| 86197             | Bca case           | pTa   | 79  | Male   | Training/Discovery Phase |
| 88122             | Bca case           | pTa   | 79  | Male   | Training/Discovery Phase |
| 88124             | Bca case           | pTa   | 79  | Male   | Training/Discovery Phase |
| 80651             | Bca case           | pT1   | 80  | Male   | Training/Discovery Phase |
| 80656             | Bca case           | pT1   | 80  | Male   | Training/Discovery Phase |
| 80636             | Bca case           | pT2   | 80  | Male   | Training/Discovery Phase |
| 80637             | Bca case           | pT2   | 80  | Male   | Training/Discovery Phase |
| 82083             | Bca case           | pTa   | 80  | Male   | Training/Discovery Phase |
| 85021             | Bca case           | pTa   | 80  | Male   | Training/Discovery Phase |
| 88103             | Bca case           | pTa   | 80  | Male   | Training/Discovery Phase |
| 86364             | Bca case           | pTis  | 80  | Male   | Training/Discovery Phase |
| 86809             | Bca case           | pT1   | 81  | Male   | Training/Discovery Phase |
| 87054             | Bca case           | pT1   | 81  | Male   | Training/Discovery Phase |
| 27074             | Bca case           | pT3   | 81  | Male   | Training/Discovery Phase |
| 85000             | Bca case           | pTa   | 81  | Male   | Training/Discovery Phase |
| 86196             | Bca case           | pTa   | 81  | Male   | Training/Discovery Phase |
| 19870             | Bca case           | pT2   | 82  | Male   | Training/Discovery Phase |
| 85199             | Bca case           | pTa   | 82  | Male   | Training/Discovery Phase |
| 87315             | Bca case           | pTa   | 82  | Male   | Training/Discovery Phase |
| 27951             | Bca case           | pT1   | 83  | Male   | Training/Discovery Phase |
| 80630             | Bca case           | pT1   | 83  | Male   | Training/Discovery Phase |
| 86019             | Bca case           | pT1   | 83  | Male   | Training/Discovery Phase |
| 86215             | Bca case           | pT1   | 83  | Male   | Training/Discovery Phase |
| 86719             | Bca case           | pT1   | 83  | Male   | Training/Discovery Phase |
| 85987             | Bca case           | pTa   | 83  | Male   | Training/Discovery Phase |
| 86235             | Bca case           | pTa   | 83  | Male   | Training/Discovery Phase |
| 85022             | Bca case           | pT1   | 84  | Male   | Training/Discovery Phase |
| 27081             | Bca case           | pT2   | 84  | Male   | Training/Discovery Phase |
| 88135             | Bca case           | pT2   | 84  | Male   | Training/Discovery Phase |
| 85818             | Bca case           | pTa   | 84  | Male   | Training/Discovery Phase |
| 86003             | Bca case           | pTis  | 84  | Male   | Training/Discovery Phase |
| 85992             | Bca case           | pT1   | 85  | Male   | Training/Discovery Phase |
| 19865             | Bca case           | pT2   | 85  | Male   | Training/Discovery Phase |
| 87833             | Bca case           | pT2   | 85  | Male   | Training/Discovery Phase |
| 85029             | Bca case           | pT1   | 86  | Male   | Training/Discovery Phase |
| 88120             | Bca case           | pT1   | 86  | Male   | Training/Discovery Phase |
| 87776             | Bca case           | pT2   | 86  | Male   | Training/Discovery Phase |
| 86593             | Bca case           | pTa   | 86  | Male   | Training/Discovery Phase |
| 84962             | Bca case           | pTa   | 87  | Male   | Training/Discovery Phase |
| 86708             | Bca case           | pT2   | 88  | Male   | Training/Discovery Phase |
| 84952             | Bca case           | pTa   | 88  | Male   | Training/Discovery Phase |
| 81304             | Bca case           | pT1   | 89  | Male   | Training/Discovery Phase |
| 86811             | Bca case           | pT1   | 95  | Male   | Training/Discovery Phase |
| 27967             | Bca case           | pTa   | 83  |        | Training/Discovery Phase |
| 19962             | Urological Control |       | 34  | Female | Test/Validation Phase    |
| 20890             | Urological Control |       | 36  | Female | Test/Validation Phase    |
| 20891             | Urological Control |       | 41  | Female | Test/Validation Phase    |
| 20913             | Urological Control |       | 46  | Female | Test/Validation Phase    |



| CE-MS Analysis ID | Diagnosis          | Stage | Age | Gender | Analytical Phase      |
|-------------------|--------------------|-------|-----|--------|-----------------------|
| 20938             | Urological Control |       | 55  | Female | Test/Validation Phase |
| 21033             | Urological Control |       | 63  | Female | Test/Validation Phase |
| 21524             | Urological Control |       | 68  | Female | Test/Validation Phase |
| 21694             | Urological Control |       | 78  | Female | Test/Validation Phase |
| 17256             | Urological Control |       | 33  | Male   | Test/Validation Phase |
| 20937             | Urological Control |       | 48  | Male   | Test/Validation Phase |
| 20941             | Urological Control |       | 60  | Male   | Test/Validation Phase |
| 21091             | Urological Control |       | 63  | Male   | Test/Validation Phase |
| 21155             | Urological Control |       | 64  | Male   | Test/Validation Phase |
| 21251             | Urological Control |       | 65  | Male   | Test/Validation Phase |
| 21620             | Urological Control |       | 69  | Male   | Test/Validation Phase |
| 21693             | Urological Control |       | 70  | Male   | Test/Validation Phase |
| 21708             | Urological Control |       | 78  | Male   | Test/Validation Phase |
| 21740             | Urological Control |       | 83  | Male   | Test/Validation Phase |
| 21750             | Urological Control |       | 85  | Male   | Test/Validation Phase |
| 87043             | Urological Control |       | 85  | Male   | Test/Validation Phase |
| 87214             | Urological Control |       | 86  | Male   | Test/Validation Phase |
| 87448             | Urological Control |       | 86  | Male   | Test/Validation Phase |
| 87640             | Urological Control |       | 93  | Male   | Test/Validation Phase |
| 27921             | BCa case           | pT2   | 51  | Female | Test/Validation Phase |
| 27974             | BCa case           | pT1   | 52  | Female | Test/Validation Phase |
| 27986             | BCa case           | pT2   | 53  | Female | Test/Validation Phase |
| 27998             | BCa case           | pT1   | 54  | Female | Test/Validation Phase |
| 87030             | BCa case           | pT1   | 54  | Female | Test/Validation Phase |
| 87035             | BCa case           | pT1   | 54  | Female | Test/Validation Phase |
| 87066             | BCa case           | pTa   | 54  | Female | Test/Validation Phase |
| 87077             | BCa case           | pTa   | 54  | Female | Test/Validation Phase |
| 87106             | BCa case           | pT2   | 56  | Female | Test/Validation Phase |
| 19839             | BCa case           | pT3   | 59  | Female | Test/Validation Phase |
| 20734             | BCa case           | pT2   | 60  | Female | Test/Validation Phase |
| 27949             | BCa case           | pTa   | 62  | Female | Test/Validation Phase |
| 27961             | BCa case           | pTa   | 62  | Female | Test/Validation Phase |
| 27991             | BCa case           | pTa   | 63  | Female | Test/Validation Phase |
| 87029             | BCa case           | pT1   | 64  | Female | Test/Validation Phase |
| 87031             | BCa case           | pTa   | 64  | Female | Test/Validation Phase |
| 87079             | BCa case           | pT3   | 65  | Female | Test/Validation Phase |
| 87190             | BCa case           | pTis  | 65  | Female | Test/Validation Phase |
| 87461             | BCa case           | pTa   | 66  | Female | Test/Validation Phase |
| 19898             | BCa case           | pTa   | 67  | Female | Test/Validation Phase |
| 19903             | BCa case           | pTa   | 67  | Female | Test/Validation Phase |
| 17473             | BCa case           | pT3   | 70  | Female | Test/Validation Phase |
| 17567             | BCa case           | pT4   | 70  | Female | Test/Validation Phase |
| 27671             | BCa case           | pTa   | 73  | Female | Test/Validation Phase |
| 27739             | BCa case           | pTa   | 74  | Female | Test/Validation Phase |
| 27982             | BCa case           | pTa   | 76  | Female | Test/Validation Phase |
| 87203             | BCa case           | pTa   | 79  | Female | Test/Validation Phase |
| 19844             | BCa case           | pTa   | 86  | Female | Test/Validation Phase |
| 17751             | BCa case           | pT2   | 27  | Male   | Test/Validation Phase |
| 17201             | Bca case           | pTa   | 48  | Male   | Test/Validation Phase |

| CE-MS Analysis ID | Diagnosis | Stage | Age | Gender | Analytical Phase      |
|-------------------|-----------|-------|-----|--------|-----------------------|
| 27726             | BCa case  | pT1   | 49  | Male   | Test/Validation Phase |
| 27735             | BCa case  | pTa   | 49  | Male   | Test/Validation Phase |
| 27923             | BCa case  | pTa   | 51  | Male   | Test/Validation Phase |
| 27987             | BCa case  | pTa   | 53  | Male   | Test/Validation Phase |
| 27988             | BCa case  | pTa   | 53  | Male   | Test/Validation Phase |
| 27997             | BCa case  | pTis  | 53  | Male   | Test/Validation Phase |
| 87044             | BCa case  | pT2   | 54  | Male   | Test/Validation Phase |
| 87078             | BCa case  | pT1   | 55  | Male   | Test/Validation Phase |
| 87080             | BCa case  | pTa   | 55  | Male   | Test/Validation Phase |
| 87105             | BCa case  | pT2   | 56  | Male   | Test/Validation Phase |
| 87123             | BCa case  | pTa   | 56  | Male   | Test/Validation Phase |
| 87585             | BCa case  | pT2   | 57  | Male   | Test/Validation Phase |
| 87631             | BCa case  | pT2   | 58  | Male   | Test/Validation Phase |
| 87701             | BCa case  | pTa   | 58  | Male   | Test/Validation Phase |
| 19899             | BCa case  | pT1   | 60  | Male   | Test/Validation Phase |
| 20741             | BCa case  | pT2   | 60  | Male   | Test/Validation Phase |
| 27686             | BCa case  | pTa   | 60  | Male   | Test/Validation Phase |
| 27697             | BCa case  | pTa   | 60  | Male   | Test/Validation Phase |
| 27711             | BCa case  | pTa   | 60  | Male   | Test/Validation Phase |
| 27925             | BCa case  | pT1   | 61  | Male   | Test/Validation Phase |
| 27952             | BCa case  | pTa   | 62  | Male   | Test/Validation Phase |
| 27969             | BCa case  | pT1   | 63  | Male   | Test/Validation Phase |
| 27970             | BCa case  | pTa   | 63  | Male   | Test/Validation Phase |
| 27992             | BCa case  | pTa   | 63  | Male   | Test/Validation Phase |
| 32560             | BCa case  | pTa   | 63  | Male   | Test/Validation Phase |
| 87045             | BCa case  | pTa   | 64  | Male   | Test/Validation Phase |
| 87074             | BCa case  | pT1   | 65  | Male   | Test/Validation Phase |
| 87125             | BCa case  | pTa   | 65  | Male   | Test/Validation Phase |
| 87195             | BCa case  | pT2   | 66  | Male   | Test/Validation Phase |
| 87242             | BCa case  | pT3   | 66  | Male   | Test/Validation Phase |
| 87244             | BCa case  | pTa   | 66  | Male   | Test/Validation Phase |
| 87271             | BCa case  | pTa   | 66  | Male   | Test/Validation Phase |
| 87664             | BCa case  | pT1   | 67  | Male   | Test/Validation Phase |
| 10264             | BCa case  | pT2   | 67  | Male   | Test/Validation Phase |
| 20074             | BCa case  | pT3   | 68  | Male   | Test/Validation Phase |
| 21707             | BCa case  | pTa   | 68  | Male   | Test/Validation Phase |
| 26567             | BCa case  | pT1   | 69  | Male   | Test/Validation Phase |
| 27724             | BCa case  | pT2   | 69  | Male   | Test/Validation Phase |
| 27847             | BCa case  | pT2   | 69  | Male   | Test/Validation Phase |
| 27953             | BCa case  | pTa   | 69  | Male   | Test/Validation Phase |
| 27955             | BCa case  | pT2   | 70  | Male   | Test/Validation Phase |
| 27956             | BCa case  | pT2   | 70  | Male   | Test/Validation Phase |
| 27960             | BCa case  | pT2   | 70  | Male   | Test/Validation Phase |
| 28010             | BCa case  | pT3   | 70  | Male   | Test/Validation Phase |
| 27764             | BCa case  | pT1   | 71  | Male   | Test/Validation Phase |
| 27766             | BCa case  | pT1   | 71  | Male   | Test/Validation Phase |
| 27604             | BCa case  | pT2   | 71  | Male   | Test/Validation Phase |
| 27606             | BCa case  | pTa   | 71  | Male   | Test/Validation Phase |
| 27609             | BCa case  | pT1   | 72  | Male   | Test/Validation Phase |

| <b>CE-MS Analysis ID</b> | <b>Diagnosis</b> | <b>Stage</b> | <b>Age</b> | <b>Gender</b> | <b>Analytical Phase</b> |
|--------------------------|------------------|--------------|------------|---------------|-------------------------|
| 27610                    | BCa case         | pTa          | 72         | Male          | Test/Validation Phase   |
| 27611                    | BCa case         | pTis         | 72         | Male          | Test/Validation Phase   |
| 27652                    | BCa case         | pT1          | 73         | Male          | Test/Validation Phase   |
| 27670                    | BCa case         | pT3          | 73         | Male          | Test/Validation Phase   |
| 27723                    | BCa case         | pT1          | 74         | Male          | Test/Validation Phase   |
| 27725                    | BCa case         | pT1          | 74         | Male          | Test/Validation Phase   |
| 27727                    | BCa case         | pT3          | 74         | Male          | Test/Validation Phase   |
| 27738                    | BCa case         | pT4          | 74         | Male          | Test/Validation Phase   |
| 27751                    | BCa case         | pTa          | 74         | Male          | Test/Validation Phase   |
| 27805                    | BCa case         | pTis         | 74         | Male          | Test/Validation Phase   |
| 27813                    | BCa case         | pT2          | 75         | Male          | Test/Validation Phase   |
| 27922                    | BCa case         | pTa          | 75         | Male          | Test/Validation Phase   |
| 27927                    | BCa case         | pTa          | 75         | Male          | Test/Validation Phase   |
| 27976                    | BCa case         | pTa          | 75         | Male          | Test/Validation Phase   |
| 27977                    | BCa case         | pT2          | 76         | Male          | Test/Validation Phase   |
| 27978                    | BCa case         | pT2          | 76         | Male          | Test/Validation Phase   |
| 27979                    | BCa case         | pT2          | 76         | Male          | Test/Validation Phase   |
| 27980                    | BCa case         | pT3          | 76         | Male          | Test/Validation Phase   |
| 27981                    | BCa case         | pT3          | 76         | Male          | Test/Validation Phase   |
| 27984                    | BCa case         | pTa          | 76         | Male          | Test/Validation Phase   |
| 86821                    | BCa case         | pTa          | 76         | Male          | Test/Validation Phase   |
| 86901                    | BCa case         | pTis         | 76         | Male          | Test/Validation Phase   |
| 87017                    | BCa case         | pT1          | 77         | Male          | Test/Validation Phase   |
| 87028                    | BCa case         | pT2          | 77         | Male          | Test/Validation Phase   |
| 87033                    | BCa case         | pT2          | 77         | Male          | Test/Validation Phase   |
| 87047                    | BCa case         | pTa          | 77         | Male          | Test/Validation Phase   |
| 87075                    | BCa case         | pTa          | 77         | Male          | Test/Validation Phase   |
| 87076                    | BCa case         | pT2          | 78         | Male          | Test/Validation Phase   |
| 87108                    | BCa case         | pT2          | 78         | Male          | Test/Validation Phase   |
| 87126                    | BCa case         | pT3          | 78         | Male          | Test/Validation Phase   |
| 87130                    | BCa case         | pT3          | 78         | Male          | Test/Validation Phase   |
| 87133                    | BCa case         | pTa          | 79         | Male          | Test/Validation Phase   |
| 87199                    | BCa case         | pTa          | 79         | Male          | Test/Validation Phase   |
| 87200                    | BCa case         | pTa          | 79         | Male          | Test/Validation Phase   |
| 87204                    | BCa case         | pTa          | 79         | Male          | Test/Validation Phase   |
| 87232                    | BCa case         | pT2          | 80         | Male          | Test/Validation Phase   |
| 87235                    | BCa case         | pT3          | 80         | Male          | Test/Validation Phase   |
| 87240                    | BCa case         | pTa          | 80         | Male          | Test/Validation Phase   |
| 87270                    | BCa case         | pTa          | 80         | Male          | Test/Validation Phase   |
| 87358                    | BCa case         | pTis         | 80         | Male          | Test/Validation Phase   |
| 87446                    | BCa case         | pT1          | 81         | Male          | Test/Validation Phase   |
| 87460                    | BCa case         | pT2          | 81         | Male          | Test/Validation Phase   |
| 87485                    | BCa case         | pT3          | 81         | Male          | Test/Validation Phase   |
| 87580                    | BCa case         | pTa          | 81         | Male          | Test/Validation Phase   |
| 87582                    | BCa case         | pT2          | 82         | Male          | Test/Validation Phase   |
| 87584                    | BCa case         | pTa          | 82         | Male          | Test/Validation Phase   |
| 87587                    | BCa case         | pT1          | 83         | Male          | Test/Validation Phase   |
| 87622                    | BCa case         | pT1          | 83         | Male          | Test/Validation Phase   |
| 87669                    | BCa case         | pTa          | 83         | Male          | Test/Validation Phase   |

| <b>CE-MS Analysis ID</b> | <b>Diagnosis</b> | <b>Stage</b> | <b>Age</b> | <b>Gender</b> | <b>Analytical Phase</b> |
|--------------------------|------------------|--------------|------------|---------------|-------------------------|
| 87672                    | BCa case         | pTa          | 83         | Male          | Test/Validation Phase   |
| 87677                    | BCa case         | pTa          | 83         | Male          | Test/Validation Phase   |
| 87702                    | BCa case         | pTa          | 83         | Male          | Test/Validation Phase   |
| 87713                    | BCa case         | pTa          | 83         | Male          | Test/Validation Phase   |
| 17255                    | BCa case         | pTa          | 85         | Male          | Test/Validation Phase   |
| 92595                    | BCa case         | pTa          | 85         | Male          | Test/Validation Phase   |
| 19835                    | BCa case         | pT1          | 86         | Male          | Test/Validation Phase   |
| 19836                    | BCa case         | pT2          | 86         | Male          | Test/Validation Phase   |
| 19901                    | BCa case         | pTa          | 86         | Male          | Test/Validation Phase   |
| 87081                    | BCa case         | pTa          | 87         | Male          | Test/Validation Phase   |

**Abbreviations: BCa, Bladder Cancer**

**Supplementary Table S4. Spreadsheet 2.** Clinical and demographical data of the prostate cancer cohort (n=385).

| CE-MS Analysis ID | Diagnosis | Stage | Age | PSA level | Gleason Score | Analytical Phase         |
|-------------------|-----------|-------|-----|-----------|---------------|--------------------------|
| 108669            | BPH       |       | 70  | 0,6       |               | Training/Discovery Phase |
| 108859            | BPH       |       | 66  | 1         |               | Training/Discovery Phase |
| 108911            | BPH       |       | 70  | 2,3       |               | Training/Discovery Phase |
| 108951            | BPH       |       | 67  | 2,8       |               | Training/Discovery Phase |
| 70492             | BPH       |       | 67  | 3,05      |               | Training/Discovery Phase |
| 25528             | BPH       |       | 69  | 3,1       |               | Training/Discovery Phase |
| 70491             | BPH       |       | 56  | 3,38      |               | Training/Discovery Phase |
| 48785             | BPH       |       | 55  | 3,54      |               | Training/Discovery Phase |
| 45192             | BPH       |       | 59  | 3,59      |               | Training/Discovery Phase |
| 28104             | BPH       |       | 69  | 3,73      |               | Training/Discovery Phase |
| 108256            | BPH       |       | 68  | 3,79      |               | Training/Discovery Phase |
| 70489             | BPH       |       | 65  | 3,84      |               | Training/Discovery Phase |
| 27846             | BPH       |       | 62  | 3,89      |               | Training/Discovery Phase |
| 70551             | BPH       |       | 68  | 3,99      |               | Training/Discovery Phase |
| 27939             | BPH       |       | 75  | 4,1       |               | Training/Discovery Phase |
| 70476             | BPH       |       | 54  | 4,2       |               | Training/Discovery Phase |
| 108963            | BPH       |       | 75  | 4,3       |               | Training/Discovery Phase |
| 70450             | BPH       |       | 56  | 4,4       |               | Training/Discovery Phase |
| 25728             | BPH       |       | 67  | 4,52      |               | Training/Discovery Phase |
| 70456             | BPH       |       | 59  | 4,7       |               | Training/Discovery Phase |
| 108941            | BPH       |       | 73  | 4,7       |               | Training/Discovery Phase |
| 69694             | BPH       |       | 69  | 4,71      |               | Training/Discovery Phase |
| 26008             | BPH       |       | 71  | 4,8       |               | Training/Discovery Phase |
| 108778            | BPH       |       | 58  | 4,89      |               | Training/Discovery Phase |
| 25609             | BPH       |       | 63  | 5,06      |               | Training/Discovery Phase |
| 26017             | BPH       |       | 68  | 5,08      |               | Training/Discovery Phase |
| 70446             | BPH       |       | 68  | 5,08      |               | Training/Discovery Phase |
| 108262            | BPH       |       | 65  | 5,1       |               | Training/Discovery Phase |
| 108902            | BPH       |       | 75  | 5,1       |               | Training/Discovery Phase |
| 20632             | BPH       |       | 73  | 5,2       |               | Training/Discovery Phase |
| 108282            | BPH       |       | 58  | 5,25      |               | Training/Discovery Phase |
| 78724             | BPH       |       | 72  | 5,3       |               | Training/Discovery Phase |
| 25800             | BPH       |       | 61  | 5,33      |               | Training/Discovery Phase |
| 83250             | BPH       |       | 76  | 5,4       |               | Training/Discovery Phase |
| 70484             | BPH       |       | 78  | 5,4       |               | Training/Discovery Phase |
| 25594             | BPH       |       | 70  | 5,55      |               | Training/Discovery Phase |
| 70567             | BPH       |       | 71  | 5,6       |               | Training/Discovery Phase |
| 70452             | BPH       |       | 76  | 5,6       |               | Training/Discovery Phase |
| 20616             | BPH       |       | 68  | 5,66      |               | Training/Discovery Phase |
| 25627             | BPH       |       | 60  | 5,7       |               | Training/Discovery Phase |
| 108805            | BPH       |       | 80  | 5,7       |               | Training/Discovery Phase |
| 108283            | BPH       |       | 60  | 5,8       |               | Training/Discovery Phase |
| 108266            | BPH       |       | 58  | 5,9       |               | Training/Discovery Phase |
| 78757             | BPH       |       | 71  | 5,9       |               | Training/Discovery Phase |
| 28100             | BPH       |       | 69  | 5,98      |               | Training/Discovery Phase |
| 70459             | BPH       |       | 71  | 6         |               | Training/Discovery Phase |
| 70565             | BPH       |       | 55  | 6,08      |               | Training/Discovery Phase |

| CE-MS Analysis ID | Diagnosis | Stage | Age | PSA level | Gleason Score | Analytical Phase         |
|-------------------|-----------|-------|-----|-----------|---------------|--------------------------|
| 22701             | BPH       |       | 67  | 6,16      |               | Training/Discovery Phase |
| 108971            | BPH       |       | 71  | 6,2       |               | Training/Discovery Phase |
| 108748            | BPH       |       | 75  | 6,2       |               | Training/Discovery Phase |
| 70418             | BPH       |       | 87  | 6,4       |               | Training/Discovery Phase |
| 70481             | BPH       |       | 58  | 6,41      |               | Training/Discovery Phase |
| 70349             | BPH       |       | 51  | 6,45      |               | Training/Discovery Phase |
| 108823            | BPH       |       | 79  | 6,5       |               | Training/Discovery Phase |
| 22826             | BPH       |       | 73  | 6,6       |               | Training/Discovery Phase |
| 70560             | BPH       |       | 57  | 6,62      |               | Training/Discovery Phase |
| 70463             | BPH       |       | 63  | 6,63      |               | Training/Discovery Phase |
| 79039             | BPH       |       | 70  | 6,7       |               | Training/Discovery Phase |
| 25074             | BPH       |       | 57  | 6,72      |               | Training/Discovery Phase |
| 70445             | BPH       |       | 52  | 6,96      |               | Training/Discovery Phase |
| 78799             | BPH       |       | 65  | 7,2       |               | Training/Discovery Phase |
| 78978             | BPH       |       | 64  | 7,22      |               | Training/Discovery Phase |
| 26011             | BPH       |       | 63  | 7,27      |               | Training/Discovery Phase |
| 33073             | BPH       |       | 74  | 7,3       |               | Training/Discovery Phase |
| 108975            | BPH       |       | 74  | 7,4       |               | Training/Discovery Phase |
| 108249            | BPH       |       | 63  | 7,58      |               | Training/Discovery Phase |
| 108830            | BPH       |       | 68  | 7,58      |               | Training/Discovery Phase |
| 83362             | BPH       |       | 80  | 7,6       |               | Training/Discovery Phase |
| 32609             | BPH       |       | 79  | 7,8       |               | Training/Discovery Phase |
| 109000            | BPH       |       | 62  | 7,82      |               | Training/Discovery Phase |
| 43564             | BPH       |       | 62  | 8,03      |               | Training/Discovery Phase |
| 70570             | BPH       |       | 64  | 8,18      |               | Training/Discovery Phase |
| 70470             | BPH       |       | 78  | 8,2       |               | Training/Discovery Phase |
| 108314            | BPH       |       | 74  | 8,5       |               | Training/Discovery Phase |
| 108862            | BPH       |       | 66  | 8,61      |               | Training/Discovery Phase |
| 70333             | BPH       |       | 65  | 8,71      |               | Training/Discovery Phase |
| 70430             | BPH       |       | 81  | 8,8       |               | Training/Discovery Phase |
| 45186             | BPH       |       | 72  | 8,9       |               | Training/Discovery Phase |
| 70417             | BPH       |       | 56  | 9,1       |               | Training/Discovery Phase |
| 70441             | BPH       |       | 52  | 9,13      |               | Training/Discovery Phase |
| 108744            | BPH       |       | 68  | 9,4       |               | Training/Discovery Phase |
| 70482             | BPH       |       | 77  | 9,5       |               | Training/Discovery Phase |
| 28004             | BPH       |       | 60  | 9,7       |               | Training/Discovery Phase |
| 108393            | BPH       |       | 84  | 9,7       |               | Training/Discovery Phase |
| 70465             | BPH       |       | 51  | 9,89      |               | Training/Discovery Phase |
| 108967            | BPH       |       | 77  | 10        |               | Training/Discovery Phase |
| 108787            | BPH       |       | 63  | 10,34     |               | Training/Discovery Phase |
| 28602             | BPH       |       | 62  | 10,56     |               | Training/Discovery Phase |
| 23046             | BPH       |       | 65  | 10,56     |               | Training/Discovery Phase |
| 45194             | BPH       |       | 71  | 10,8      |               | Training/Discovery Phase |
| 27625             | BPH       |       | 58  | 11,3      |               | Training/Discovery Phase |
| 79002             | BPH       |       | 63  | 11,7      |               | Training/Discovery Phase |
| 78701             | BPH       |       | 70  | 11,82     |               | Training/Discovery Phase |
| 32836             | BPH       |       | 67  | 11,9      |               | Training/Discovery Phase |
| 70458             | BPH       |       | 69  | 11,9      |               | Training/Discovery Phase |

| CE-MS Analysis ID | Diagnosis | Stage | Age | PSA level | Gleason Score | Analytical Phase         |
|-------------------|-----------|-------|-----|-----------|---------------|--------------------------|
| 25742             | BPH       |       | 71  | 12,4      |               | Training/Discovery Phase |
| 45147             | BPH       |       | 72  | 12,8      |               | Training/Discovery Phase |
| 79070             | BPH       |       | 60  | 13,25     |               | Training/Discovery Phase |
| 25562             | BPH       |       | 74  | 13,4      |               | Training/Discovery Phase |
| 45184             | BPH       |       | 72  | 13,9      |               | Training/Discovery Phase |
| 108905            | BPH       |       | 65  | 14,4      |               | Training/Discovery Phase |
| 83420             | BPH       |       | 71  | 14,6      |               | Training/Discovery Phase |
| 108670            | BPH       |       | 83  | 15        |               | Training/Discovery Phase |
| 108258            | BPH       |       | 67  | 15,06     |               | Training/Discovery Phase |
| 108263            | BPH       |       | 54  | 16,9      |               | Training/Discovery Phase |
| 51385             | BPH       |       | 61  | 17,55     |               | Training/Discovery Phase |
| 108833            | BPH       |       | 72  | 18,3      |               | Training/Discovery Phase |
| 24196             | BPH       |       | 73  | 18,8      |               | Training/Discovery Phase |
| 45142             | BPH       |       | 61  | 19,78     |               | Training/Discovery Phase |
| 26010             | BPH       |       | 58  | 20,56     |               | Training/Discovery Phase |
| 45151             | BPH       |       | 57  | 21,7      |               | Training/Discovery Phase |
| 22863             | BPH       |       | 59  | 24        |               | Training/Discovery Phase |
| 25885             | BPH       |       | 72  | 28        |               | Training/Discovery Phase |
| 108253            | BPH       |       | 69  | 28,6      |               | Training/Discovery Phase |
| 108261            | BPH       |       | 62  | 30,61     |               | Training/Discovery Phase |
| 108983            | BPH       |       | 70  | 63,8      |               | Training/Discovery Phase |
| 108978            | BPH       |       | 56  | 72,5      |               | Training/Discovery Phase |
| 26065             | BPH       |       | 54  |           |               | Training/Discovery Phase |
| 25603             | BPH       |       | 55  |           |               | Training/Discovery Phase |
| 108747            | BPH       |       | 62  |           |               | Training/Discovery Phase |
| 70586             | BPH       |       | 64  |           |               | Training/Discovery Phase |
| 108934            | BPH       |       | 64  |           |               | Training/Discovery Phase |
| 43870             | BPH       |       | 65  |           |               | Training/Discovery Phase |
| 17290             | BPH       |       | 65  |           |               | Training/Discovery Phase |
| 45198             | BPH       |       | 65  |           |               | Training/Discovery Phase |
| 108251            | BPH       |       | 65  |           |               | Training/Discovery Phase |
| 108342            | BPH       |       | 65  |           |               | Training/Discovery Phase |
| 108974            | BPH       |       | 65  |           |               | Training/Discovery Phase |
| 79096             | BPH       |       | 65  |           |               | Training/Discovery Phase |
| 25707             | BPH       |       | 67  |           |               | Training/Discovery Phase |
| 83520             | PCa case  | pT3   | 53  | 1,61      |               | Training/Discovery Phase |
| 70569             | PCa case  |       | 65  | 2,53      |               | Training/Discovery Phase |
| 70525             | PCa case  |       | 60  | 3,03      |               | Training/Discovery Phase |
| 70585             | PCa case  |       | 65  | 3,27      |               | Training/Discovery Phase |
| 26122             | PCa case  |       | 60  | 3,58      |               | Training/Discovery Phase |
| 108972            | PCa case  |       | 66  | 3,6       |               | Training/Discovery Phase |
| 78694             | PCa case  |       | 65  | 3,8       |               | Training/Discovery Phase |
| 83141             | PCa case  |       | 62  | 3,89      |               | Training/Discovery Phase |
| 83143             | PCa case  |       | 61  | 4,07      |               | Training/Discovery Phase |
| 70528             | PCa case  |       | 68  | 4,17      |               | Training/Discovery Phase |
| 83496             | PCa case  | pT3   | 64  | 4,49      |               | Training/Discovery Phase |
| 108779            | PCa case  |       | 68  | 4,76      |               | Training/Discovery Phase |
| 83267             | PCa case  | pT2   | 53  | 4,77      |               | Training/Discovery Phase |
| 108749            | PCa case  | pT4   | 59  | 4,81      |               | Training/Discovery Phase |

| CE-MS Analysis ID | Diagnosis | Stage | Age | PSA level | Gleason Score | Analytical Phase         |
|-------------------|-----------|-------|-----|-----------|---------------|--------------------------|
| 43862             | PCa case  |       | 73  | 4,9       | 6             | Training/Discovery Phase |
| 108428            | PCa case  |       | 82  | 5         | 6             | Training/Discovery Phase |
| 70679             | PCa case  |       | 70  | 5,5       | 7             | Training/Discovery Phase |
| 70468             | PCa case  |       | 71  | 5,8       | 7             | Training/Discovery Phase |
| 83345             | PCa case  | pT3   | 75  | 5,8       | 7             | Training/Discovery Phase |
| 70451             | PCa case  |       | 69  | 5,8       |               | Training/Discovery Phase |
| 108341            | PCa case  |       | 73  | 5,9       | 7             | Training/Discovery Phase |
| 70595             | PCa case  |       | 68  | 5,97      |               | Training/Discovery Phase |
| 108863            | PCa case  |       | 72  | 6         | 7             | Training/Discovery Phase |
| 108746            | PCa case  | pT3   | 70  | 6,2       | 6             | Training/Discovery Phase |
| 45197             | PCa case  |       | 65  | 6,2       |               | Training/Discovery Phase |
| 32697             | PCa case  |       | 54  | 6,38      |               | Training/Discovery Phase |
| 23234             | PCa case  |       | 66  | 6,4       |               | Training/Discovery Phase |
| 70668             | PCa case  |       | 78  | 6,5       | 7             | Training/Discovery Phase |
| 108826            | PCa case  |       | 64  | 6,75      |               | Training/Discovery Phase |
| 45191             | PCa case  |       | 71  | 6,8       | 6             | Training/Discovery Phase |
| 28452             | PCa case  |       | 74  | 6,8       |               | Training/Discovery Phase |
| 69688             | PCa case  |       | 69  | 6,88      |               | Training/Discovery Phase |
| 70575             | PCa case  |       | 70  | 7,1       | 7             | Training/Discovery Phase |
| 108976            | PCa case  |       | 72  | 7,1       | 7             | Training/Discovery Phase |
| 45149             | PCa case  |       | 73  | 7,2       | 7             | Training/Discovery Phase |
| 20634             | PCa case  |       | 67  | 7,2       |               | Training/Discovery Phase |
| 70580             | PCa case  |       | 61  | 7,3       |               | Training/Discovery Phase |
| 108790            | PCa case  |       | 68  | 7,34      |               | Training/Discovery Phase |
| 43754             | PCa case  | pT2   | 65  | 7,4       |               | Training/Discovery Phase |
| 108827            | PCa case  |       | 69  | 7,5       | 7             | Training/Discovery Phase |
| 83522             | PCa case  |       | 74  | 7,5       | 7             | Training/Discovery Phase |
| 25544             | PCa case  |       | 68  | 7,67      |               | Training/Discovery Phase |
| 70566             | PCa case  |       | 69  | 7,92      |               | Training/Discovery Phase |
| 83521             | PCa case  | pT4   | 75  | 8         | 7             | Training/Discovery Phase |
| 32539             | PCa case  |       | 68  | 8,01      |               | Training/Discovery Phase |
| 70527             | PCa case  |       | 68  | 8,09      |               | Training/Discovery Phase |
| 108357            | PCa case  |       | 73  | 8,1       | 7             | Training/Discovery Phase |
| 83262             | PCa case  | pT3   | 82  | 8,1       | 6             | Training/Discovery Phase |
| 83208             | PCa case  | pT3   | 74  | 8,2       | 7             | Training/Discovery Phase |
| 83342             | PCa case  |       | 76  | 8,2       | 6             | Training/Discovery Phase |
| 70670             | PCa case  |       | 69  | 8,2       |               | Training/Discovery Phase |
| 108829            | PCa case  |       | 67  | 8,49      |               | Training/Discovery Phase |
| 43572             | PCa case  | PT1   | 74  | 8,6       | 7             | Training/Discovery Phase |
| 108836            | PCa case  |       | 63  | 8,75      |               | Training/Discovery Phase |
| 83344             | PCa case  | pT4   | 87  | 8,8       | 6             | Training/Discovery Phase |
| 45156             | PCa case  |       | 72  | 8,9       | 6             | Training/Discovery Phase |
| 70665             | PCa case  |       | 72  | 9         | 7             | Training/Discovery Phase |
| 45202             | PCa case  |       | 73  | 9,2       | 7             | Training/Discovery Phase |
| 70579             | PCa case  |       | 75  | 9,3       | 6             | Training/Discovery Phase |
| 83268             | PCa case  | pT3   | 75  | 9,3       | 7             | Training/Discovery Phase |
| 108344            | PCa case  |       | 73  | 9,3       |               | Training/Discovery Phase |
| 108822            | PCa case  |       | 66  | 9,4       |               | Training/Discovery Phase |



| CE-MS Analysis ID | Diagnosis | Stage | Age | PSA level | Gleason Score | Analytical Phase         |
|-------------------|-----------|-------|-----|-----------|---------------|--------------------------|
| 83269             | PCa case  |       | 77  | 9,5       | 7             | Training/Discovery Phase |
| 70485             | PCa case  |       | 79  | 9,5       | 9             | Training/Discovery Phase |
| 108285            | PCa case  |       | 69  | 9,72      |               | Training/Discovery Phase |
| 83145             | PCa case  | pT2   | 66  | 10        |               | Training/Discovery Phase |
| 83356             | PCa case  |       | 61  | 10,03     |               | Training/Discovery Phase |
| 43601             | PCa case  | pT3   | 59  | 10,04     |               | Training/Discovery Phase |
| 70419             | PCa case  |       | 56  | 10,16     |               | Training/Discovery Phase |
| 45193             | PCa case  |       | 73  | 10,4      | 6             | Training/Discovery Phase |
| 70654             | PCa case  |       | 57  | 10,55     |               | Training/Discovery Phase |
| 108696            | PCa case  |       | 60  | 10,86     |               | Training/Discovery Phase |
| 83225             | PCa case  |       | 64  | 11,2      |               | Training/Discovery Phase |
| 108315            | PCa case  | pT2   | 86  | 11,4      | 9             | Training/Discovery Phase |
| 83508             | PCa case  | pT2   | 63  | 11,48     |               | Training/Discovery Phase |
| 108742            | PCa case  | pT3   | 71  | 11,5      | 7             | Training/Discovery Phase |
| 70671             | PCa case  |       | 74  | 11,5      | 6             | Training/Discovery Phase |
| 83237             | PCa case  | pT4   | 76  | 11,5      | 7             | Training/Discovery Phase |
| 70563             | PCa case  |       | 59  | 11,79     |               | Training/Discovery Phase |
| 24968             | PCa case  |       | 72  | 12        | 7             | Training/Discovery Phase |
| 70433             | PCa case  |       | 48  | 12,03     |               | Training/Discovery Phase |
| 22820             | PCa case  |       | 68  | 12,3      |               | Training/Discovery Phase |
| 45139             | PCa case  |       | 58  | 12,6      |               | Training/Discovery Phase |
| 70475             | PCa case  |       | 54  | 13,1      |               | Training/Discovery Phase |
| 108912            | PCa case  |       | 78  | 13,3      | 7             | Training/Discovery Phase |
| 108966            | PCa case  |       | 66  | 13,55     |               | Training/Discovery Phase |
| 83263             | PCa case  |       | 71  | 14,3      | 9             | Training/Discovery Phase |
| 108407            | PCa case  |       | 58  | 14,5      |               | Training/Discovery Phase |
| 20633             | PCa case  |       | 73  | 15        | 7             | Training/Discovery Phase |
| 45183             | PCa case  |       | 73  | 15        | 6             | Training/Discovery Phase |
| 83146             | PCa case  | pT3   | 77  | 15,5      |               | Training/Discovery Phase |
| 70499             | PCa case  |       | 76  | 15,7      | 9             | Training/Discovery Phase |
| 70479             | PCa case  |       | 45  | 16,02     |               | Training/Discovery Phase |
| 43556             | PCa case  | pT2   | 61  | 16,39     |               | Training/Discovery Phase |
| 83488             | PCa case  |       | 66  | 16,66     |               | Training/Discovery Phase |
| 32829             | PCa case  |       | 65  | 16,96     |               | Training/Discovery Phase |
| 70474             | PCa case  |       | 61  | 17,19     |               | Training/Discovery Phase |
| 55827             | PCa case  |       | 71  | 17,3      | 9             | Training/Discovery Phase |
| 70341             | PCa case  |       | 60  | 17,56     |               | Training/Discovery Phase |
| 27658             | PCa case  |       | 64  | 17,7      |               | Training/Discovery Phase |
| 108973            | PCa case  |       | 74  | 19,9      |               | Training/Discovery Phase |
| 44011             | PCa case  |       | 63  | 20,21     |               | Training/Discovery Phase |
| 83444             | PCa case  |       | 77  | 23,7      | 9             | Training/Discovery Phase |
| 83261             | PCa case  | pT4   | 86  | 25,2      | 7             | Training/Discovery Phase |
| 108743            | PCa case  | pT4   | 76  | 26,9      | 7             | Training/Discovery Phase |
| 45201             | PCa case  |       | 68  | 31,42     |               | Training/Discovery Phase |
| 83122             | PCa case  | pT2   | 66  | 31,5      |               | Training/Discovery Phase |
| 108745            | PCa case  | pT3   | 71  | 33,4      | 7             | Training/Discovery Phase |
| 83446             | PCa case  | pT4   | 79  | 37        | 9             | Training/Discovery Phase |
| 108832            | PCa case  |       | 64  | 40,31     |               | Training/Discovery Phase |
| 45195             | PCa case  |       | 71  | 42,2      | 9             | Training/Discovery Phase |

| CE-MS Analysis ID | Diagnosis | Stage | Age | PSA level | Gleason Score | Analytical Phase         |
|-------------------|-----------|-------|-----|-----------|---------------|--------------------------|
| 45185             | PCa case  |       | 74  | 44,4      | 9             | Training/Discovery Phase |
| 70592             | PCa case  |       | 75  | 44,4      | 9             | Training/Discovery Phase |
| 70483             | PCa case  |       | 41  | 45,35     |               | Training/Discovery Phase |
| 70453             | PCa case  |       | 72  | 58,1      | 7             | Training/Discovery Phase |
| 108340            | PCa case  | pT2   | 85  | 66        | 9             | Training/Discovery Phase |
| 83142             | PCa case  |       | 71  | 71        | 8             | Training/Discovery Phase |
| 70589             | PCa case  |       | 62  | 110       |               | Training/Discovery Phase |
| 70478             | PCa case  |       | 75  | 163,1     |               | Training/Discovery Phase |
| 70554             | PCa case  |       | 71  | 217       |               | Training/Discovery Phase |
| 83215             | PCa case  | pT3   | 75  | 236,9     |               | Training/Discovery Phase |
| 83343             | PCa case  | pT3   | 76  | 329,7     |               | Training/Discovery Phase |
| 70423             | PCa case  |       | 76  | 397       |               | Training/Discovery Phase |
| 45143             | PCa case  |       | 76  | 850,5     |               | Training/Discovery Phase |
| 25642             | PCa case  |       | 73  | 987       |               | Training/Discovery Phase |
| 70494             | PCa case  |       | 45  |           |               | Training/Discovery Phase |
| 70448             | PCa case  |       | 56  |           |               | Training/Discovery Phase |
| 45153             | PCa case  |       | 68  |           |               | Training/Discovery Phase |
| 108985            | PCa case  |       | 64  |           |               | Training/Discovery Phase |
| 83341             | PCa case  | pT3   | 65  |           |               | Training/Discovery Phase |
| 45148             | PCa case  |       | 65  |           |               | Training/Discovery Phase |
| 70653             | PCa case  |       | 66  |           |               | Training/Discovery Phase |
| 83147             | PCa case  | pT2   | 67  |           |               | Training/Discovery Phase |
| 83450             | PCa case  | pT3   | 67  |           |               | Training/Discovery Phase |
| 70469             | PCa case  |       | 67  |           |               | Training/Discovery Phase |
| 108821            | PCa case  |       | 67  |           |               | Training/Discovery Phase |
| 70462             | PCa case  |       | 69  |           |               | Training/Discovery Phase |
| 83381             | PCa case  |       | 69  |           |               | Training/Discovery Phase |
| 20617             | BPH       |       | 69  | 12,5      |               | Test/Validation Phase    |
| 20620             | BPH       |       | 71  | 8,83      |               | Test/Validation Phase    |
| 20635             | BPH       |       | 65  | 3,34      |               | Test/Validation Phase    |
| 23028             | BPH       |       | 70  | 11,15     |               | Test/Validation Phase    |
| 23537             | BPH       |       | 69  | 7         |               | Test/Validation Phase    |
| 24805             | BPH       |       | 68  | 8,2       |               | Test/Validation Phase    |
| 24969             | BPH       |       | 65  | 7,29      |               | Test/Validation Phase    |
| 25611             | BPH       |       | 74  | 5,96      |               | Test/Validation Phase    |
| 25630             | BPH       |       | 53  | 6,27      |               | Test/Validation Phase    |
| 25694             | BPH       |       | 74  | 5,7       |               | Test/Validation Phase    |
| 25865             | BPH       |       | 62  | 24,57     |               | Test/Validation Phase    |
| 25942             | BPH       |       | 61  | 8,24      |               | Test/Validation Phase    |
| 25994             | BPH       |       | 65  | 18,32     |               | Test/Validation Phase    |
| 27594             | BPH       |       | 69  | 10,5      |               | Test/Validation Phase    |
| 27715             | BPH       |       | 56  | 5,4       |               | Test/Validation Phase    |
| 27758             | BPH       |       | 62  | 3,05      |               | Test/Validation Phase    |
| 28001             | BPH       |       | 83  | 4,6       |               | Test/Validation Phase    |
| 28222             | BPH       |       | 70  |           |               | Test/Validation Phase    |
| 28455             | BPH       |       | 51  | 5,6       |               | Test/Validation Phase    |
| 28456             | BPH       |       | 71  | 5,4       |               | Test/Validation Phase    |
| 28516             | BPH       |       | 73  | 12,48     |               | Test/Validation Phase    |

| CE-MS Analysis ID | Diagnosis | Stage | Age | PSA level | Gleason Score | Analytical Phase      |
|-------------------|-----------|-------|-----|-----------|---------------|-----------------------|
| 28520             | BPH       |       | 71  | 5,5       |               | Test/Validation Phase |
| 28581             | BPH       |       | 55  | 4,39      |               | Test/Validation Phase |
| 32814             | BPH       |       | 61  | 5,25      |               | Test/Validation Phase |
| 45146             | BPH       |       | 67  | 3,6       |               | Test/Validation Phase |
| 45189             | BPH       |       | 56  |           |               | Test/Validation Phase |
| 45199             | BPH       |       | 63  | 6,25      |               | Test/Validation Phase |
| 45200             | BPH       |       | 65  | 7,36      |               | Test/Validation Phase |
| 70432             | BPH       |       | 76  | 32,1      | 7             | Test/Validation Phase |
| 70454             | BPH       |       | 72  | 12,6      | 9             | Test/Validation Phase |
| 70457             | BPH       |       | 68  |           |               | Test/Validation Phase |
| 70461             | BPH       |       | 64  | 6,68      |               | Test/Validation Phase |
| 70464             | BPH       |       | 70  | 5,31      |               | Test/Validation Phase |
| 70467             | BPH       |       | 67  |           |               | Test/Validation Phase |
| 70471             | BPH       |       | 65  | 10,5      |               | Test/Validation Phase |
| 70480             | BPH       |       | 55  | 5,69      |               | Test/Validation Phase |
| 70487             | BPH       |       | 67  | 6,11      |               | Test/Validation Phase |
| 70488             | BPH       |       | 73  | 8,3       | 7             | Test/Validation Phase |
| 70490             | BPH       |       | 61  | 6,66      |               | Test/Validation Phase |
| 70500             | BPH       |       | 67  |           |               | Test/Validation Phase |
| 70559             | BPH       |       | 75  | 384       |               | Test/Validation Phase |
| 70578             | BPH       |       | 69  | 6,1       |               | Test/Validation Phase |
| 70583             | BPH       |       | 68  | 7,06      |               | Test/Validation Phase |
| 70672             | BPH       |       | 73  | 20,1      | 7             | Test/Validation Phase |
| 79011             | BPH       |       | 69  |           |               | Test/Validation Phase |
| 79669             | BPH       |       | 63  | 4,89      |               | Test/Validation Phase |
| 108672            | BPH       |       | 76  | 28,8      | 7             | Test/Validation Phase |
| 108901            | BPH       |       | 66  | 9,5       |               | Test/Validation Phase |
| 108909            | BPH       |       | 71  | 4,1       | 6             | Test/Validation Phase |
| 19386             | PCa case  |       | 64  | 6,54      |               | Test/Validation Phase |
| 22916             | PCa case  |       | 79  | 4,7       |               | Test/Validation Phase |
| 24894             | PCa case  |       | 68  | 5,2       |               | Test/Validation Phase |
| 25729             | PCa case  |       | 60  | 3,98      |               | Test/Validation Phase |
| 25982             | PCa case  |       | 67  | 6,83      |               | Test/Validation Phase |
| 27662             | PCa case  |       | 58  | 8,48      |               | Test/Validation Phase |
| 28270             | PCa case  |       | 63  | 7,38      |               | Test/Validation Phase |
| 32795             | PCa case  |       | 64  | 7,63      |               | Test/Validation Phase |
| 43600             | PCa case  |       | 58  | 3,87      |               | Test/Validation Phase |
| 43751             | PCa case  |       | 75  | 18,42     |               | Test/Validation Phase |
| 43752             | PCa case  |       | 73  | 18,9      |               | Test/Validation Phase |
| 43861             | PCa case  |       | 74  | 5,53      |               | Test/Validation Phase |
| 45145             | PCa case  |       | 56  | 1,22      |               | Test/Validation Phase |
| 45150             | PCa case  |       | 66  | 7,43      |               | Test/Validation Phase |
| 45152             | PCa case  |       | 81  | 4,9       |               | Test/Validation Phase |
| 45154             | PCa case  |       | 65  | 20,5      |               | Test/Validation Phase |
| 45187             | PCa case  |       | 62  | 5,26      |               | Test/Validation Phase |
| 45188             | PCa case  |       | 72  | 6,9       |               | Test/Validation Phase |
| 45190             | PCa case  |       | 67  | 7         |               | Test/Validation Phase |
| 70421             | PCa case  |       | 60  | 4,34      |               | Test/Validation Phase |
| 70422             | PCa case  |       | 54  | 10,01     |               | Test/Validation Phase |

| CE-MS Analysis ID | Diagnosis | Stage | Age | PSA level | Gleason Score | Analytical Phase      |
|-------------------|-----------|-------|-----|-----------|---------------|-----------------------|
| 70440             | PCa case  |       | 71  |           |               | Test/Validation Phase |
| 70455             | PCa case  |       | 73  | 17,2      | 7             | Test/Validation Phase |
| 70460             | PCa case  |       | 57  | 9,56      |               | Test/Validation Phase |
| 70473             | PCa case  | pT2   | 59  |           |               | Test/Validation Phase |
| 70486             | PCa case  |       | 71  | 4,47      |               | Test/Validation Phase |
| 70498             | PCa case  |       | 59  | 7,02      | 7             | Test/Validation Phase |
| 70526             | PCa case  |       | 66  | 2,42      |               | Test/Validation Phase |
| 70552             | PCa case  |       | 78  | 5         | 6             | Test/Validation Phase |
| 70556             | PCa case  |       | 45  | 17,4      |               | Test/Validation Phase |
| 70568             | PCa case  |       | 76  | 7,8       | 7             | Test/Validation Phase |
| 70574             | PCa case  |       | 67  | 12,89     |               | Test/Validation Phase |
| 70581             | PCa case  |       | 74  | 136       |               | Test/Validation Phase |
| 70587             | PCa case  |       | 73  | 10,9      | 6             | Test/Validation Phase |
| 70588             | PCa case  |       | 73  | 21,5      | 9             | Test/Validation Phase |
| 70590             | PCa case  |       | 63  | 9,25      |               | Test/Validation Phase |
| 70593             | PCa case  |       | 79  | 13,3      | 7             | Test/Validation Phase |
| 70596             | PCa case  |       | 54  | 5,51      |               | Test/Validation Phase |
| 70598             | PCa case  |       | 53  | 8,34      |               | Test/Validation Phase |
| 70666             | PCa case  |       | 60  | 6,13      |               | Test/Validation Phase |
| 78716             | PCa case  |       | 69  | 8,12      |               | Test/Validation Phase |
| 83226             | PCa case  |       | 62  | 11,2      |               | Test/Validation Phase |
| 83227             | PCa case  |       | 66  | 4,13      |               | Test/Validation Phase |
| 83248             | PCa case  |       | 68  |           |               | Test/Validation Phase |
| 83280             | PCa case  |       | 71  | 13,2      | 6             | Test/Validation Phase |
| 83339             | PCa case  |       | 58  | 5,79      |               | Test/Validation Phase |
| 83349             | PCa case  |       | 70  | 10,41     |               | Test/Validation Phase |
| 83355             | PCa case  |       | 61  | 8,53      |               | Test/Validation Phase |
| 83359             | PCa case  |       | 75  | 10,9      | 9             | Test/Validation Phase |
| 83372             | PCa case  |       | 61  | 6,39      |               | Test/Validation Phase |
| 83376             | PCa case  |       | 68  |           |               | Test/Validation Phase |
| 83404             | PCa case  |       | 68  | 10,1      |               | Test/Validation Phase |
| 83423             | PCa case  |       | 64  | 3,95      |               | Test/Validation Phase |
| 83424             | PCa case  |       | 74  | 16,6      | 7             | Test/Validation Phase |
| 83425             | PCa case  |       | 66  | 4,7       |               | Test/Validation Phase |
| 83431             | PCa case  |       | 86  |           | 8             | Test/Validation Phase |
| 83436             | PCa case  |       | 76  | 7,8       | 7             | Test/Validation Phase |
| 83440             | PCa case  |       | 65  | 4,4       |               | Test/Validation Phase |
| 83448             | PCa case  |       | 74  | 66,7      | 7             | Test/Validation Phase |
| 83455             | PCa case  |       | 85  | 38,2      |               | Test/Validation Phase |
| 83516             | PCa case  |       | 78  | 6,2       | 7             | Test/Validation Phase |
| 108388            | PCa case  |       | 75  | 21,3      | 6             | Test/Validation Phase |
| 108410            | PCa case  |       | 72  | 6         | 7             | Test/Validation Phase |
| 108449            | PCa case  |       | 72  | 7,7       | 7             | Test/Validation Phase |
| 108675            | PCa case  |       | 64  | 13,19     |               | Test/Validation Phase |
| 108828            | PCa case  |       | 65  | 2,2       |               | Test/Validation Phase |
| 108913            | PCa case  |       | 77  | 7,4       | 7             | Test/Validation Phase |
| 108977            | PCa case  |       | 71  | 6,8       | 7             | Test/Validation Phase |

**Abbreviations: BPH, Benign Prostatic Hyperplasia; PCa, Prostate Cancer**

**Supplementary Table S4. Spreadsheet 3.** Clinical and demographical data of pancreatic cancer cohort (n=180).

| CE-MS Analysis ID | Diagnosis            | Age | Gender | CA19-9 level | CEA level | Analytical Phase         |
|-------------------|----------------------|-----|--------|--------------|-----------|--------------------------|
| 115760            | Chronic Pancreatitis | 27  | Male   |              |           | Training/Discovery Phase |
| 115765            | Chronic Pancreatitis | 28  | Male   |              |           | Training/Discovery Phase |
| 115660            | Chronic Pancreatitis | 29  | Male   |              |           | Training/Discovery Phase |
| 115741            | Chronic Pancreatitis | 34  | Female |              |           | Training/Discovery Phase |
| 57679             | Chronic Pancreatitis | 36  | Male   |              |           | Training/Discovery Phase |
| 115744            | Chronic Pancreatitis | 37  | Male   |              |           | Training/Discovery Phase |
| 115692            | Chronic Pancreatitis | 40  | Male   |              |           | Training/Discovery Phase |
| 115655            | Chronic Pancreatitis | 40  | Male   |              |           | Training/Discovery Phase |
| 115663            | Chronic Pancreatitis | 42  | Male   |              |           | Training/Discovery Phase |
| 115690            | Chronic Pancreatitis | 43  | Male   |              |           | Training/Discovery Phase |
| 115771            | Chronic Pancreatitis | 44  | Male   |              |           | Training/Discovery Phase |
| 115656            | Chronic Pancreatitis | 45  | Male   |              |           | Training/Discovery Phase |
| 115755            | Chronic Pancreatitis | 45  | Male   |              |           | Training/Discovery Phase |
| 115772            | Chronic Pancreatitis | 45  | Male   |              |           | Training/Discovery Phase |
| 115764            | Chronic Pancreatitis | 45  | Female |              |           | Training/Discovery Phase |
| 115695            | Chronic Pancreatitis | 46  | Female |              |           | Training/Discovery Phase |
| 115701            | Chronic Pancreatitis | 46  | Male   |              |           | Training/Discovery Phase |
| 57673             | Chronic Pancreatitis | 47  | Male   | 2,9          |           | Training/Discovery Phase |
| 115769            | Chronic Pancreatitis | 47  | Male   | 3,0          | 1,0       | Training/Discovery Phase |
| 115633            | Chronic Pancreatitis | 47  | Male   | 5,0          | 1,0       | Training/Discovery Phase |
| 115743            | Chronic Pancreatitis | 47  | Male   | 10,0         | 1,0       | Training/Discovery Phase |
| 115758            | Chronic Pancreatitis | 48  | Male   | 16,0         | 1,0       | Training/Discovery Phase |
| 115749            | Chronic Pancreatitis | 48  | Male   | 37,0         | 1,0       | Training/Discovery Phase |
| 115768            | Chronic Pancreatitis | 49  | Female | 3,0          | 2,0       | Training/Discovery Phase |
| 115698            | Chronic Pancreatitis | 50  | Male   | 4,2          | 2,0       | Training/Discovery Phase |
| 115713            | Chronic Pancreatitis | 50  | Male   | 5,0          | 2,0       | Training/Discovery Phase |
| 115669            | Chronic Pancreatitis | 50  | Male   | 6,0          | 2,0       | Training/Discovery Phase |
| 115754            | Chronic Pancreatitis | 50  | Male   | 7,0          | 2,0       | Training/Discovery Phase |
| 115688            | Chronic Pancreatitis | 51  | Male   | 8,0          | 2,0       | Training/Discovery Phase |
| 115694            | Chronic Pancreatitis | 51  | Male   | 8,0          | 2,0       | Training/Discovery Phase |
| 115705            | Chronic Pancreatitis | 52  | Male   | 9,0          | 2,0       | Training/Discovery Phase |
| 115766            | Chronic Pancreatitis | 52  | Male   | 11,0         | 2,0       | Training/Discovery Phase |
| 115786            | Chronic Pancreatitis | 52  | Male   | 15,0         | 2,0       | Training/Discovery Phase |
| 115670            | Chronic Pancreatitis | 53  | Male   | 30,0         | 2,0       | Training/Discovery Phase |
| 38490             | Chronic Pancreatitis | 55  | Male   | 2,0          | 3,0       | Training/Discovery Phase |
| 115654            | Chronic Pancreatitis | 55  | Male   | 10,0         | 3,0       | Training/Discovery Phase |
| 115747            | Chronic Pancreatitis | 56  | Female | 10,0         | 3,0       | Training/Discovery Phase |
| 115649            | Chronic Pancreatitis | 57  | Male   | 14,0         | 3,0       | Training/Discovery Phase |
| 115684            | Chronic Pancreatitis | 58  | Male   | 18,0         | 3,0       | Training/Discovery Phase |
| 115672            | Chronic Pancreatitis | 58  | Male   | 19,0         | 3,0       | Training/Discovery Phase |
| 115704            | Chronic Pancreatitis | 59  | Male   | 23,0         | 3,0       | Training/Discovery Phase |
| 57680             | Chronic Pancreatitis | 59  | Male   | 86,0         | 3,0       | Training/Discovery Phase |
| 115689            | Chronic Pancreatitis | 59  | Female | 22,7         | 3,1       | Training/Discovery Phase |
| 115650            | Chronic Pancreatitis | 60  | Male   | 1,0          | 4,0       | Training/Discovery Phase |
| 115693            | Chronic Pancreatitis | 60  | Male   | 5,0          | 4,0       | Training/Discovery Phase |
| 115678            | Chronic Pancreatitis | 61  | Male   | 8,0          | 4,0       | Training/Discovery Phase |

| CE-MS<br>Analysis ID | Diagnosis            | Age | Gender | CA19-9 level | CEA level | Analytical Phase         |
|----------------------|----------------------|-----|--------|--------------|-----------|--------------------------|
| 115780               | Chronic Pancreatitis | 61  | Female | 9,0          | 4,0       | Training/Discovery Phase |
| 115799               | Chronic Pancreatitis | 61  | Male   | 14,0         | 4,0       | Training/Discovery Phase |
| 115665               | Chronic Pancreatitis | 61  | Male   | 10,0         | 5,0       | Training/Discovery Phase |
| 115779               | Chronic Pancreatitis | 63  | Female | 1,0          | 6,0       | Training/Discovery Phase |
| 115639               | Chronic Pancreatitis | 66  | Male   | 1,0          | 6,0       | Training/Discovery Phase |
| 115667               | Chronic Pancreatitis | 68  | Male   | 18,0         | 6,0       | Training/Discovery Phase |
| 115777               | Chronic Pancreatitis | 69  | Male   | 17,0         | 7,0       | Training/Discovery Phase |
| 115762               | Chronic Pancreatitis | 72  | Male   | 19,0         | 7,0       | Training/Discovery Phase |
| 115740               | Chronic Pancreatitis | 73  | Male   | 23,0         | 7,0       | Training/Discovery Phase |
| 115746               | Chronic Pancreatitis | 73  | Female | 1,0          | 8,0       | Training/Discovery Phase |
| 115682               | Chronic Pancreatitis | 75  | Male   | 1,0          | 8,0       | Training/Discovery Phase |
| 115742               | Chronic Pancreatitis | 77  | Male   | 63,0         | 9,0       | Training/Discovery Phase |
| 115717               | Chronic Pancreatitis |     | Female | 1,0          | 16,0      | Training/Discovery Phase |
| 115721               | Chronic Pancreatitis |     | Male   | 15,0         | 20,0      | Training/Discovery Phase |
| 115733               | Chronic Pancreatitis |     | Male   | 598,7        | 21,0      | Training/Discovery Phase |
| 115724               | Chronic Pancreatitis |     | Male   | 1,0          | 30,0      | Training/Discovery Phase |
| 38608                | Pancreatic cancer    | 35  | Female |              |           | Training/Discovery Phase |
| 115781               | Pancreatic cancer    | 35  | Male   |              |           | Training/Discovery Phase |
| 115789               | Pancreatic cancer    | 43  | Male   |              |           | Training/Discovery Phase |
| 115737               | Pancreatic cancer    | 43  | Male   |              |           | Training/Discovery Phase |
| 115748               | Pancreatic cancer    | 44  | Male   |              |           | Training/Discovery Phase |
| 115734               | Pancreatic cancer    | 46  | Male   |              |           | Training/Discovery Phase |
| 115631               | Pancreatic cancer    | 48  | Male   |              |           | Training/Discovery Phase |
| 115641               | Pancreatic cancer    | 52  | Female |              |           | Training/Discovery Phase |
| 115681               | Pancreatic cancer    | 53  | Male   |              |           | Training/Discovery Phase |
| 115637               | Pancreatic cancer    | 55  | Male   |              |           | Training/Discovery Phase |
| 115782               | Pancreatic cancer    | 55  | Male   |              |           | Training/Discovery Phase |
| 115803               | Pancreatic cancer    | 56  | Male   |              |           | Training/Discovery Phase |
| 115802               | Pancreatic cancer    | 56  | Male   |              |           | Training/Discovery Phase |
| 115753               | Pancreatic cancer    | 57  | Male   |              |           | Training/Discovery Phase |
| 115643               | Pancreatic cancer    | 58  | Male   | 2,0          | 1,0       | Training/Discovery Phase |
| 115790               | Pancreatic cancer    | 59  | Female | 5,0          | 1,0       | Training/Discovery Phase |
| 115723               | Pancreatic cancer    | 60  | Male   | 1,0          | 6,0       | Training/Discovery Phase |
| 115800               | Pancreatic cancer    | 60  | Female | 3,0          | 6,0       | Training/Discovery Phase |
| 115703               | Pancreatic cancer    | 61  | Male   |              | 9,5       | Training/Discovery Phase |
| 115773               | Pancreatic cancer    | 62  | Male   | 2,0          | 12,0      | Training/Discovery Phase |
| 115775               | Pancreatic cancer    | 62  | Male   | 9            | 12,0      | Training/Discovery Phase |
| 115646               | Pancreatic cancer    | 64  | Female | 2,0          | 18,0      | Training/Discovery Phase |
| 115666               | Pancreatic cancer    | 66  | Female | 7,0          | 23,0      | Training/Discovery Phase |
| 115709               | Pancreatic cancer    | 67  | Male   |              | 25,0      | Training/Discovery Phase |
| 115719               | Pancreatic cancer    | 67  | Female | 9,0          | 31,9      | Training/Discovery Phase |
| 115774               | Pancreatic cancer    | 67  | Male   | 917,5        | 35,0      | Training/Discovery Phase |
| 56165                | Pancreatic cancer    | 68  | Female |              | 39,5      | Training/Discovery Phase |
| 115673               | Pancreatic cancer    | 69  | Male   |              | 92,0      | Training/Discovery Phase |
| 115638               | Pancreatic cancer    | 69  | Female | 3,0          | 123,0     | Training/Discovery Phase |
| 115644               | Pancreatic cancer    | 69  | Female | 4,0          | 186,0     | Training/Discovery Phase |
| 56171                | Pancreatic cancer    | 69  | Female | 30,0         | 205,0     | Training/Discovery Phase |
| 115691               | Pancreatic cancer    | 71  | Female | 4,0          | 214,0     | Training/Discovery Phase |

| CE-MS Analysis ID | Diagnosis            | Age | Gender | CA19-9 level | CEA level | Analytical Phase         |
|-------------------|----------------------|-----|--------|--------------|-----------|--------------------------|
| 115642            | Pancreatic cancer    | 71  | Male   | 5,0          | 302,0     | Training/Discovery Phase |
| 115657            | Pancreatic cancer    | 71  | Female |              | 321,9     | Training/Discovery Phase |
| 115784            | Pancreatic cancer    | 72  | Female | 6,0          | 327,0     | Training/Discovery Phase |
| 115708            | Pancreatic cancer    | 72  | Male   | 5,0          | 374,0     | Training/Discovery Phase |
| 56160             | Pancreatic cancer    | 73  | Male   | 12,0         | 450,0     | Training/Discovery Phase |
| 115729            | Pancreatic cancer    | 75  | Male   | 5,0          | 823,5     | Training/Discovery Phase |
| 115787            | Pancreatic cancer    | 75  | Female | 2,8          | 1078,0    | Training/Discovery Phase |
| 38491             | Pancreatic cancer    | 76  | Male   | 2,0          | 1284,0    | Training/Discovery Phase |
| 115653            | Pancreatic cancer    | 76  | Male   | 36,0         | 1829,0    | Training/Discovery Phase |
| 115795            | Pancreatic cancer    | 76  | Male   |              | 1913,0    | Training/Discovery Phase |
| 115798            | Pancreatic cancer    | 76  | Male   |              | 2222,0    | Training/Discovery Phase |
| 115792            | Pancreatic cancer    | 76  | Male   | 2,6          | 2537,0    | Training/Discovery Phase |
| 115715            | Pancreatic cancer    | 76  | Male   | 2,0          | 2651,0    | Training/Discovery Phase |
| 115696            | Pancreatic cancer    | 77  | Male   | 3,0          | 3336,0    | Training/Discovery Phase |
| 115727            | Pancreatic cancer    | 77  | Male   |              | 3492,0    | Training/Discovery Phase |
| 115720            | Pancreatic cancer    | 79  | Male   | 57,0         | 4867,0    | Training/Discovery Phase |
| 115757            | Pancreatic cancer    | 82  | Male   | 132,0        | 7990,0    | Training/Discovery Phase |
| 115718            | Pancreatic cancer    | 86  | Female |              | 10500,0   | Training/Discovery Phase |
| 115699            | Pancreatic cancer    | 88  | Male   | 8,0          | 11893,0   | Training/Discovery Phase |
| 115726            | Pancreatic cancer    |     | Male   | 33,0         | 13149,0   | Training/Discovery Phase |
| 115661            | Pancreatic cancer    |     | Female | 1051,0       | 30124,0   | Training/Discovery Phase |
| 115680            | Pancreatic cancer    |     | Female |              | 42502,0   | Training/Discovery Phase |
| 115677            | Pancreatic cancer    |     | Female | 26,0         | 58382,0   | Training/Discovery Phase |
| 115732            | Pancreatic cancer    |     | Male   | 27,0         | 191530,0  | Training/Discovery Phase |
| 115728            | Pancreatic cancer    |     | Female | 45,0         | 481998,0  | Training/Discovery Phase |
| 115725            | Pancreatic cancer    |     | Female | 349,0        | 575127,0  | Training/Discovery Phase |
| 115714            | Pancreatic cancer    |     | Male   |              |           | Training/Discovery Phase |
| 115662            | Pancreatic cancer    |     | Male   |              |           | Training/Discovery Phase |
| 115731            | Pancreatic cancer    |     | Male   |              |           | Training/Discovery Phase |
| 115761            | Chronic Pancreatitis | 25  | Female |              |           | Test/Validation Phase    |
| 115674            | Chronic Pancreatitis | 28  | Male   |              |           | Test/Validation Phase    |
| 38566             | Chronic Pancreatitis | 36  | Male   |              |           | Test/Validation Phase    |
| 115652            | Chronic Pancreatitis | 39  | Male   |              |           | Test/Validation Phase    |
| 115745            | Chronic Pancreatitis | 39  | Male   |              |           | Test/Validation Phase    |
| 115702            | Chronic Pancreatitis | 43  | Male   |              |           | Test/Validation Phase    |
| 115683            | Chronic Pancreatitis | 44  | Male   |              |           | Test/Validation Phase    |
| 115697            | Chronic Pancreatitis | 45  | Male   |              |           | Test/Validation Phase    |
| 115751            | Chronic Pancreatitis | 47  | Female | 7,0          | 1,0       | Test/Validation Phase    |
| 115756            | Chronic Pancreatitis | 47  | Male   | 17,0         | 1,0       | Test/Validation Phase    |
| 115640            | Chronic Pancreatitis | 48  | Female | 5,0          | 2,0       | Test/Validation Phase    |
| 38474             | Chronic Pancreatitis | 49  | Male   | 5,0          | 2,0       | Test/Validation Phase    |
| 115679            | Chronic Pancreatitis | 50  | Male   | 10,0         | 2,0       | Test/Validation Phase    |
| 115645            | Chronic Pancreatitis | 50  | Male   | 13,0         | 2,0       | Test/Validation Phase    |
| 115759            | Chronic Pancreatitis | 51  | Male   | 21,0         | 2,0       | Test/Validation Phase    |
| 115767            | Chronic Pancreatitis | 52  | Male   | 0,6          | 2,6       | Test/Validation Phase    |
| 115685            | Chronic Pancreatitis | 52  | Male   | 3,0          | 3,0       | Test/Validation Phase    |
| 115776            | Chronic Pancreatitis | 54  | Male   | 5,0          | 3,0       | Test/Validation Phase    |

| CE-MS<br>Analysis ID | Diagnosis            | Age | Gender | CA19-9 level | CEA level | Analytical Phase      |
|----------------------|----------------------|-----|--------|--------------|-----------|-----------------------|
| 115770               | Chronic Pancreatitis | 56  | Male   | 7,0          | 3,0       | Test/Validation Phase |
| 115750               | Chronic Pancreatitis | 57  | Male   | 14,0         | 3,0       | Test/Validation Phase |
| 115647               | Chronic Pancreatitis | 59  | Male   | 99,0         | 3,0       | Test/Validation Phase |
| 115664               | Chronic Pancreatitis | 59  | Male   | 13,0         | 4,0       | Test/Validation Phase |
| 38468                | Chronic Pancreatitis | 60  | Male   | 24,0         | 4,0       | Test/Validation Phase |
| 115710               | Chronic Pancreatitis | 61  | Male   | 36,0         | 4,0       | Test/Validation Phase |
| 115668               | Chronic Pancreatitis | 61  | Male   | 363,0        | 4,0       | Test/Validation Phase |
| 115648               | Chronic Pancreatitis | 62  | Male   | 19,0         | 5,0       | Test/Validation Phase |
| 115687               | Chronic Pancreatitis | 65  | Male   | 51,0         | 7,0       | Test/Validation Phase |
| 115634               | Chronic Pancreatitis | 70  | Male   | 41,0         | 8,0       | Test/Validation Phase |
| 115671               | Chronic Pancreatitis | 73  | Male   | 246,0        | 9,0       | Test/Validation Phase |
| 115797               | Chronic Pancreatitis | 73  | Male   | 140,0        | 112,0     | Test/Validation Phase |
| 115716               | Pancreatic cancer    | 33  | Male   |              |           | Test/Validation Phase |
| 115738               | Pancreatic cancer    | 41  | Male   |              |           | Test/Validation Phase |
| 115763               | Pancreatic cancer    | 44  | Male   |              |           | Test/Validation Phase |
| 115636               | Pancreatic cancer    | 46  | Female |              |           | Test/Validation Phase |
| 115706               | Pancreatic cancer    | 46  | Female |              |           | Test/Validation Phase |
| 115707               | Pancreatic cancer    | 49  | Female |              |           | Test/Validation Phase |
| 115711               | Pancreatic cancer    | 49  | Female |              |           | Test/Validation Phase |
| 115793               | Pancreatic cancer    | 52  | Female |              |           | Test/Validation Phase |
| 115783               | Pancreatic cancer    | 55  | Female | 25,0         | 7,0       | Test/Validation Phase |
| 115722               | Pancreatic cancer    | 56  | Male   | 4,0          | 8,0       | Test/Validation Phase |
| 115712               | Pancreatic cancer    | 61  | Female | 1,0          | 21,0      | Test/Validation Phase |
| 115739               | Pancreatic cancer    | 62  | Female | 1,0          | 33,0      | Test/Validation Phase |
| 115791               | Pancreatic cancer    | 62  | Male   | 3,0          | 36,0      | Test/Validation Phase |
| 115794               | Pancreatic cancer    | 64  | Male   | 1,0          | 60,0      | Test/Validation Phase |
| 115635               | Pancreatic cancer    | 68  | Male   | 1,0          | 106,0     | Test/Validation Phase |
| 115796               | Pancreatic cancer    | 69  | Male   | 6,0          | 108,0     | Test/Validation Phase |
| 115658               | Pancreatic cancer    | 70  | Male   | 2,0          | 162,0     | Test/Validation Phase |
| 115736               | Pancreatic cancer    | 70  | Female | 3,0          | 199,0     | Test/Validation Phase |
| 115686               | Pancreatic cancer    | 71  | Male   | 0,0          | 275,1     | Test/Validation Phase |
| 115700               | Pancreatic cancer    | 73  | Female | 36,0         | 291,0     | Test/Validation Phase |
| 115735               | Pancreatic cancer    | 74  | Male   | 2,0          | 552,0     | Test/Validation Phase |
| 115785               | Pancreatic cancer    | 76  | Male   | 7,0          | 638,0     | Test/Validation Phase |
| 115752               | Pancreatic cancer    | 76  | Female | 17,0         | 3321,0    | Test/Validation Phase |
| 115801               | Pancreatic cancer    | 76  | Female | 0,0          | 10000,0   | Test/Validation Phase |
| 115778               | Pancreatic cancer    | 78  | Male   | 4,4          | 25275,0   | Test/Validation Phase |
| 115788               | Pancreatic cancer    | 79  | Female | 12,0         | 56771,0   | Test/Validation Phase |
| 115651               | Pancreatic cancer    | 90  | Male   |              | 120931,0  | Test/Validation Phase |



**Supplementary Table S4. Spreadsheet 4.** Clinical and demographical data of renal cell carcinoma cohort (n=175).

| CE-MS Analysis ID | Diagnosis   | Stage | Age | Gender | Analytical Phase         |
|-------------------|-------------|-------|-----|--------|--------------------------|
| 9481              | RCC control |       | 23  | Female | Training/Discovery Phase |
| 9468              | RCC control |       | 25  | Male   | Training/Discovery Phase |
| 15036             | RCC control |       | 26  | Male   | Training/Discovery Phase |
| 21685             | RCC control |       | 37  | Female | Training/Discovery Phase |
| 27124             | RCC control |       | 42  | Male   | Training/Discovery Phase |
| 27235             | RCC control |       | 47  | Male   | Training/Discovery Phase |
| 41357             | RCC control |       | 48  | Female | Training/Discovery Phase |
| 21719             | RCC control |       | 50  | Male   | Training/Discovery Phase |
| 36678             | RCC control |       | 50  | Male   | Training/Discovery Phase |
| 41305             | RCC control |       | 52  | Female | Training/Discovery Phase |
| 9506              | RCC control |       | 54  | Female | Training/Discovery Phase |
| 9308              | RCC control |       | 55  | Female | Training/Discovery Phase |
| 17115             | RCC control |       | 55  | Male   | Training/Discovery Phase |
| 27228             | RCC control |       | 57  | Male   | Training/Discovery Phase |
| 36625             | RCC control |       | 58  | Female | Training/Discovery Phase |
| 21623             | RCC control |       | 58  | Male   | Training/Discovery Phase |
| 21692             | RCC control |       | 59  | Male   | Training/Discovery Phase |
| 38731             | RCC control |       | 60  | Male   | Training/Discovery Phase |
| 41420             | RCC control |       | 61  | Female | Training/Discovery Phase |
| 38735             | RCC control |       | 61  | Male   | Training/Discovery Phase |
| 21704             | RCC control |       | 62  | Female | Training/Discovery Phase |
| 9278              | RCC control |       | 62  | Male   | Training/Discovery Phase |
| 21690             | RCC control |       | 63  | Male   | Training/Discovery Phase |
| 41413             | RCC control |       | 64  | Female | Training/Discovery Phase |
| 24132             | RCC control |       | 65  | Female | Training/Discovery Phase |
| 36586             | RCC control |       | 65  | Male   | Training/Discovery Phase |
| 16159             | RCC control |       | 66  | Male   | Training/Discovery Phase |
| 21817             | RCC control |       | 67  | Female | Training/Discovery Phase |
| 36666             | RCC control |       | 67  | Male   | Training/Discovery Phase |
| 9306              | RCC control |       | 68  | Male   | Training/Discovery Phase |
| 9698              | RCC control |       | 68  | Male   | Training/Discovery Phase |
| 17116             | RCC control |       | 68  | Male   | Training/Discovery Phase |
| 21632             | RCC control |       | 70  | Male   | Training/Discovery Phase |
| 21709             | RCC control |       | 70  | Male   | Training/Discovery Phase |
| 38712             | RCC control |       | 70  | Male   | Training/Discovery Phase |
| 21672             | RCC control |       | 71  | Female | Training/Discovery Phase |
| 41437             | RCC control |       | 71  | Female | Training/Discovery Phase |
| 21631             | RCC control |       | 71  | Male   | Training/Discovery Phase |
| 38695             | RCC control |       | 71  | Male   | Training/Discovery Phase |
| 21633             | RCC control |       | 72  | Female | Training/Discovery Phase |
| 21630             | RCC control |       | 73  | Female | Training/Discovery Phase |
| 21698             | RCC control |       | 74  | Female | Training/Discovery Phase |
| 21712             | RCC control |       | 74  | Male   | Training/Discovery Phase |
| 21815             | RCC control |       | 75  | Female | Training/Discovery Phase |
| 38719             | RCC control |       | 75  | Male   | Training/Discovery Phase |
| 21629             | RCC control |       | 77  | Female | Training/Discovery Phase |

| CE-MS Analysis ID | Diagnosis   | Stage | Age | Gender | Analytical Phase         |
|-------------------|-------------|-------|-----|--------|--------------------------|
| 21635             | RCC control |       | 77  | Male   | Training/Discovery Phase |
| 21710             | RCC control |       | 77  | Male   | Training/Discovery Phase |
| 21626             | RCC control |       | 78  | Female | Training/Discovery Phase |
| 21669             | RCC control |       | 78  | Male   | Training/Discovery Phase |
| 21726             | RCC control |       | 82  | Female | Training/Discovery Phase |
| 21671             | RCC control |       | 84  | Male   | Training/Discovery Phase |
| 39243             | RCC control |       |     | Male   | Training/Discovery Phase |
| 39274             | RCC control |       |     | Male   | Training/Discovery Phase |
| 10052             | RCC control |       |     |        | Training/Discovery Phase |
| 10054             | RCC control |       |     |        | Training/Discovery Phase |
| 10055             | RCC control |       |     |        | Training/Discovery Phase |
| 10058             | RCC control |       |     |        | Training/Discovery Phase |
| 10059             | RCC control |       |     |        | Training/Discovery Phase |
| 10063             | RCC control |       |     |        | Training/Discovery Phase |
| 13875             | RCC control |       |     |        | Training/Discovery Phase |
| 13879             | RCC control |       |     |        | Training/Discovery Phase |
| 13880             | RCC control |       |     |        | Training/Discovery Phase |
| 13897             | RCC control |       |     |        | Training/Discovery Phase |
| 13898             | RCC control |       |     |        | Training/Discovery Phase |
| 13899             | RCC control |       |     |        | Training/Discovery Phase |
| 15349             | RCC control |       |     |        | Training/Discovery Phase |
| 19100             | RCC control |       |     |        | Training/Discovery Phase |
| 19157             | RCC control |       |     |        | Training/Discovery Phase |
| 19190             | RCC control |       |     |        | Training/Discovery Phase |
| 23985             | RCC control |       |     |        | Training/Discovery Phase |
| 24023             | RCC control |       |     |        | Training/Discovery Phase |
| 24032             | RCC control |       |     |        | Training/Discovery Phase |
| 24245             | RCC control |       |     |        | Training/Discovery Phase |
| 10797             | RCC control |       |     | Female | Training/Discovery Phase |
| 9449              | RCC control |       |     | Male   | Training/Discovery Phase |
| 10796             | RCC control |       |     | Male   | Training/Discovery Phase |
| 10051             | RCC control |       |     |        | Training/Discovery Phase |
| 10061             | RCC control |       |     |        | Training/Discovery Phase |
| 10070             | RCC control |       |     |        | Training/Discovery Phase |
| 10081             | RCC case    | pT1   | 41  | Female | Training/Discovery Phase |
| 18992             | RCC case    | pT1   | 41  | Male   | Training/Discovery Phase |
| 18602             | RCC case    | pT2   | 41  | Female | Training/Discovery Phase |
| 19908             | RCC case    |       | 42  | Male   | Training/Discovery Phase |
| 18971             | RCC case    |       | 44  | Male   | Training/Discovery Phase |
| 19971             | RCC case    | pT1   | 46  | Male   | Training/Discovery Phase |
| 10087             | RCC case    | pT2   | 46  | Male   | Training/Discovery Phase |
| 18636             | RCC case    | pT2   | 48  | Male   | Training/Discovery Phase |
| 13900             | RCC case    | pT3   | 49  | Male   | Training/Discovery Phase |
| 18962             | RCC case    | pT1   | 50  | Male   | Training/Discovery Phase |
| 15344             | RCC case    | pT3   | 51  | Female | Training/Discovery Phase |
| 18887             | RCC case    | pT1   | 52  | Female | Training/Discovery Phase |
| 18929             | RCC case    |       | 53  | Male   | Training/Discovery Phase |
| 18938             | RCC case    | pT1   | 55  | Female | Training/Discovery Phase |
| 18973             | RCC case    | pT2   | 57  | Female | Training/Discovery Phase |

| CE-MS Analysis ID | Diagnosis   | Stage | Age | Gender | Analytical Phase         |
|-------------------|-------------|-------|-----|--------|--------------------------|
| 18960             | RCC case    |       | 57  | Male   | Training/Discovery Phase |
| 15343             | RCC case    | pT1   | 58  | Male   | Training/Discovery Phase |
| 19821             | RCC case    | pT2   | 58  | Male   | Training/Discovery Phase |
| 10071             | RCC case    | pT1   | 60  | Male   | Training/Discovery Phase |
| 18994             | RCC case    | pT3   | 60  | Male   | Training/Discovery Phase |
| 18905             | RCC case    | pT1   | 61  | Male   | Training/Discovery Phase |
| 18872             | RCC case    | pT2   | 61  | Female | Training/Discovery Phase |
| 10079             | RCC case    | pT1   | 62  | Male   | Training/Discovery Phase |
| 10089             | RCC case    | pT2   | 64  | Male   | Training/Discovery Phase |
| 13878             | RCC case    | pT1   | 66  | Male   | Training/Discovery Phase |
| 18516             | RCC case    | pT2   | 66  | Male   | Training/Discovery Phase |
| 18934             | RCC case    | pT3   | 66  | Male   | Training/Discovery Phase |
| 10076             | RCC case    | pT1   | 67  | Male   | Training/Discovery Phase |
| 10090             | RCC case    | pT3   | 67  | Female | Training/Discovery Phase |
| 18870             | RCC case    | pT3   | 67  | Female | Training/Discovery Phase |
| 13877             | RCC case    | pT3   | 68  | Male   | Training/Discovery Phase |
| 10091             | RCC case    | pT1   | 69  | Male   | Training/Discovery Phase |
| 19893             | RCC case    | pT1   | 70  | Female | Training/Discovery Phase |
| 10080             | RCC case    |       | 71  | Female | Training/Discovery Phase |
| 18736             | RCC case    | pT1   | 72  | Female | Training/Discovery Phase |
| 10093             | RCC case    | pT3   | 72  | Male   | Training/Discovery Phase |
| 10077             | RCC case    | pT3   | 73  | Female | Training/Discovery Phase |
| 15342             | RCC case    | pT3   | 73  | Male   | Training/Discovery Phase |
| 15337             | RCC case    |       | 74  | Male   | Training/Discovery Phase |
| 18883             | RCC case    |       | 74  | Male   | Training/Discovery Phase |
| 18958             | RCC case    | pT1   | 75  | Female | Training/Discovery Phase |
| 10088             | RCC case    | pT3   | 75  | Female | Training/Discovery Phase |
| 13913             | RCC case    | pT1   | 79  | Male   | Training/Discovery Phase |
| 18930             | RCC case    | pT1   | 79  | Male   | Training/Discovery Phase |
| 18942             | RCC case    |       | 79  | Female | Training/Discovery Phase |
| 10072             | RCC case    | pT3   | 81  | Male   | Training/Discovery Phase |
| 9464              | RCC control |       | 28  | Female | Test/Validation Phase    |
| 38690             | RCC control |       | 51  | Male   | Test/Validation Phase    |
| 10804             | RCC control |       | 52  | Female | Test/Validation Phase    |
| 41379             | RCC control |       | 55  | Female | Test/Validation Phase    |
| 21689             | RCC control |       | 56  | Male   | Test/Validation Phase    |
| 21627             | RCC control |       | 58  | Male   | Test/Validation Phase    |
| 38701             | RCC control |       | 59  | Male   | Test/Validation Phase    |
| 41331             | RCC control |       | 60  | Female | Test/Validation Phase    |
| 36624             | RCC control |       | 63  | Male   | Test/Validation Phase    |
| 37610             | RCC control |       | 64  | Female | Test/Validation Phase    |
| 21624             | RCC control |       | 64  | Male   | Test/Validation Phase    |
| 38700             | RCC control |       | 64  | Male   | Test/Validation Phase    |
| 24154             | RCC control |       | 65  | Female | Test/Validation Phase    |
| 38684             | RCC control |       | 66  | Male   | Test/Validation Phase    |
| 21662             | RCC control |       | 67  | Female | Test/Validation Phase    |
| 21663             | RCC control |       | 68  | Female | Test/Validation Phase    |
| 41361             | RCC control |       | 70  | Female | Test/Validation Phase    |
| 38696             | RCC control |       | 70  | Male   | Test/Validation Phase    |

| CE-MS Analysis ID | Diagnosis   | Stage | Age | Gender | Analytical Phase      |
|-------------------|-------------|-------|-----|--------|-----------------------|
| 21793             | RCC control |       | 71  | Male   | Test/Validation Phase |
| 21702             | RCC control |       | 72  | Female | Test/Validation Phase |
| 21676             | RCC control |       | 75  | Male   | Test/Validation Phase |
| 37876             | RCC control |       | 75  | Male   | Test/Validation Phase |
| 21668             | RCC control |       | 77  | Female | Test/Validation Phase |
| 21686             | RCC control |       | 78  | Male   | Test/Validation Phase |
| 38693             | RCC control |       | 80  | Male   | Test/Validation Phase |
| 18723             | RCC case    | pT1   | 44  | Female | Test/Validation Phase |
| 18921             | RCC case    | pT3   | 54  | Female | Test/Validation Phase |
| 19016             | RCC case    | pT1   | 56  | Female | Test/Validation Phase |
| 18885             | RCC case    |       | 58  | Female | Test/Validation Phase |
| 18919             | RCC case    |       | 63  | Female | Test/Validation Phase |
| 10086             | RCC case    |       | 68  | Female | Test/Validation Phase |
| 10073             | RCC case    | pT1   | 69  | Female | Test/Validation Phase |
| 18578             | RCC case    |       | 74  | Female | Test/Validation Phase |
| 18543             | RCC case    |       | 78  | Female | Test/Validation Phase |
| 10075             | RCC case    |       | 33  | Male   | Test/Validation Phase |
| 10082             | RCC case    |       | 36  | Male   | Test/Validation Phase |
| 18928             | RCC case    |       | 44  | Male   | Test/Validation Phase |
| 18963             | RCC case    |       | 49  | Male   | Test/Validation Phase |
| 18937             | RCC case    |       | 53  | Male   | Test/Validation Phase |
| 18961             | RCC case    |       | 58  | Male   | Test/Validation Phase |
| 10074             | RCC case    |       | 62  | Male   | Test/Validation Phase |
| 18886             | RCC case    |       | 64  | Male   | Test/Validation Phase |
| 15345             | RCC case    |       | 66  | Male   | Test/Validation Phase |
| 18995             | RCC case    |       | 66  | Male   | Test/Validation Phase |
| 13887             | RCC case    |       | 71  | Male   | Test/Validation Phase |
| 18579             | RCC case    |       | 72  | Male   | Test/Validation Phase |
| 15348             | RCC case    |       | 73  | Male   | Test/Validation Phase |
| 18920             | RCC case    |       | 79  | Male   | Test/Validation Phase |
| 19889             | RCC case    |       | 79  | Male   | Test/Validation Phase |

**Abbreviations: RCC, Renal Cell Carcinoma**

**Supplementary Table S4. Spreadsheet 5.** Clinical and demographical data of cholangiocarcinoma cohort (n=240).

| CE-MS Analysis ID | Diagnosis                | Stage | Age | Gender | Analytical Phase         |
|-------------------|--------------------------|-------|-----|--------|--------------------------|
| 38609             | Benign biliary disorders |       | 22  | Female | Training/Discovery Phase |
| 38686             | Benign biliary disorders |       | 35  | Female | Training/Discovery Phase |
| 38577             | Benign biliary disorders |       | 37  | Female | Training/Discovery Phase |
| 38562             | Benign biliary disorders |       | 38  | Female | Training/Discovery Phase |
| 65637             | Benign biliary disorders |       | 41  | Female | Training/Discovery Phase |
| 38605             | Benign biliary disorders |       | 43  | Female | Training/Discovery Phase |
| 38641             | Benign biliary disorders |       | 45  | Female | Training/Discovery Phase |
| 52204             | Benign biliary disorders |       | 45  | Male   | Training/Discovery Phase |
| 38526             | Benign biliary disorders |       | 46  | Female | Training/Discovery Phase |
| 38449             | Benign biliary disorders |       | 47  | Female | Training/Discovery Phase |
| 36193             | Benign biliary disorders |       | 50  | Male   | Training/Discovery Phase |
| 52273             | Benign biliary disorders |       | 51  | Female | Training/Discovery Phase |
| 36157             | Benign biliary disorders |       | 56  | Male   | Training/Discovery Phase |
| 52183             | Benign biliary disorders |       | 57  | Female | Training/Discovery Phase |
| 52174             | Benign biliary disorders |       | 59  | Male   | Training/Discovery Phase |
| 52175             | Benign biliary disorders |       | 60  | Female | Training/Discovery Phase |
| 52272             | Benign biliary disorders |       | 62  | Male   | Training/Discovery Phase |
| 52283             | Benign biliary disorders |       | 64  | Male   | Training/Discovery Phase |
| 38525             | Benign biliary disorders |       | 66  | Male   | Training/Discovery Phase |
| 38530             | Benign biliary disorders |       | 66  | Female | Training/Discovery Phase |
| 38492             | Benign biliary disorders |       | 68  | Male   | Training/Discovery Phase |
| 36187             | Benign biliary disorders |       | 70  | Male   | Training/Discovery Phase |
| 38519             | Benign biliary disorders |       | 75  | Female | Training/Discovery Phase |
| 52269             | Benign biliary disorders |       | 76  | Male   | Training/Discovery Phase |
| 38523             | Benign biliary disorders |       | 80  | Female | Training/Discovery Phase |
| 52275             | Benign biliary disorders |       | 80  | Male   | Training/Discovery Phase |
| 38497             | Benign biliary disorders |       | 82  | Male   | Training/Discovery Phase |
| 38580             | Benign biliary disorders |       | 83  | Female | Training/Discovery Phase |
| 99904             | Benign biliary disorders |       | 30  | Female | Training/Discovery Phase |
| 99920             | Benign biliary disorders |       | 29  | Female | Training/Discovery Phase |
| 99023             | Benign biliary disorders |       |     |        | Training/Discovery Phase |
| 98852             | Benign biliary disorders |       | 77  | Male   | Training/Discovery Phase |
| 99839             | Benign biliary disorders |       |     | Male   | Training/Discovery Phase |
| 66852             | Cholangiocarcinoma       |       | 22  | Male   | Training/Discovery Phase |
| 52201             | Cholangiocarcinoma       |       | 26  | Male   | Training/Discovery Phase |
| 99907             | Cholangiocarcinoma       |       | 33  | Male   | Training/Discovery Phase |
| 52520             | Cholangiocarcinoma       |       | 34  | Male   | Training/Discovery Phase |
| 38668             | Cholangiocarcinoma       |       | 35  | Female | Training/Discovery Phase |
| 99656             | Cholangiocarcinoma       |       | 40  | Female | Training/Discovery Phase |
| 51669             | Cholangiocarcinoma       |       | 41  | Male   | Training/Discovery Phase |
| 68536             | Cholangiocarcinoma       | pT2   | 41  | Male   | Training/Discovery Phase |
| 99917             | Cholangiocarcinoma       | pT3   | 42  | Female | Training/Discovery Phase |
| 85436             | Cholangiocarcinoma       |       | 43  | Male   | Training/Discovery Phase |
| 52173             | Cholangiocarcinoma       | pT3   | 45  | Male   | Training/Discovery Phase |
| 52573             | Cholangiocarcinoma       |       | 47  | Male   | Training/Discovery Phase |

| CE-MS<br>Analysis ID | Diagnosis          | Stage | Age | Gender | Analytical Phase         |
|----------------------|--------------------|-------|-----|--------|--------------------------|
| 52181                | Cholangiocarcinoma |       | 48  | Male   | Training/Discovery Phase |
| 99607                | Cholangiocarcinoma | pT2   | 50  | Female | Training/Discovery Phase |
| 52184                | Cholangiocarcinoma |       | 50  | Male   | Training/Discovery Phase |
| 57608                | Cholangiocarcinoma |       | 50  | Male   | Training/Discovery Phase |
| 38674                | Cholangiocarcinoma |       | 51  | Female | Training/Discovery Phase |
| 52523                | Cholangiocarcinoma |       | 52  | Female | Training/Discovery Phase |
| 99918                | Cholangiocarcinoma | pT2   | 53  | Male   | Training/Discovery Phase |
| 92477                | Cholangiocarcinoma |       | 54  | Female | Training/Discovery Phase |
| 99922                | Cholangiocarcinoma |       | 55  | Female | Training/Discovery Phase |
| 90566                | Cholangiocarcinoma | pT2   | 55  | Male   | Training/Discovery Phase |
| 56170                | Cholangiocarcinoma | pT2   | 56  | Female | Training/Discovery Phase |
| 99915                | Cholangiocarcinoma |       | 56  | Female | Training/Discovery Phase |
| 98973                | Cholangiocarcinoma |       | 56  | Female | Training/Discovery Phase |
| 52588                | Cholangiocarcinoma |       | 57  | Female | Training/Discovery Phase |
| 99921                | Cholangiocarcinoma |       | 57  | Male   | Training/Discovery Phase |
| 38556                | Cholangiocarcinoma |       | 58  | Female | Training/Discovery Phase |
| 44345                | Cholangiocarcinoma |       | 58  | Female | Training/Discovery Phase |
| 38473                | Cholangiocarcinoma |       | 59  | Female | Training/Discovery Phase |
| 98940                | Cholangiocarcinoma | pT3   | 59  | Male   | Training/Discovery Phase |
| 38664                | Cholangiocarcinoma |       | 60  | Female | Training/Discovery Phase |
| 115456               | Cholangiocarcinoma | pT2   | 60  | Male   | Training/Discovery Phase |
| 99900                | Cholangiocarcinoma |       | 61  | Female | Training/Discovery Phase |
| 89552                | Cholangiocarcinoma |       | 61  | Male   | Training/Discovery Phase |
| 99250                | Cholangiocarcinoma | pT3   | 62  | Female | Training/Discovery Phase |
| 38606                | Cholangiocarcinoma |       | 63  | Male   | Training/Discovery Phase |
| 99704                | Cholangiocarcinoma |       | 63  | Male   | Training/Discovery Phase |
| 99123                | Cholangiocarcinoma | pT2   | 63  | Male   | Training/Discovery Phase |
| 99700                | Cholangiocarcinoma | pT3   | 64  | Female | Training/Discovery Phase |
| 38654                | Cholangiocarcinoma |       | 64  | Male   | Training/Discovery Phase |
| 99846                | Cholangiocarcinoma |       | 65  | Female | Training/Discovery Phase |
| 38675                | Cholangiocarcinoma |       | 65  | Male   | Training/Discovery Phase |
| 115359               | Cholangiocarcinoma | pT1   | 65  | Male   | Training/Discovery Phase |
| 99522                | Cholangiocarcinoma |       | 66  | Male   | Training/Discovery Phase |
| 115354               | Cholangiocarcinoma | pT2   | 66  | Male   | Training/Discovery Phase |
| 115356               | Cholangiocarcinoma | pT2   | 66  | Male   | Training/Discovery Phase |
| 38637                | Cholangiocarcinoma |       | 67  | Female | Training/Discovery Phase |
| 52596                | Cholangiocarcinoma |       | 67  | Male   | Training/Discovery Phase |
| 52517                | Cholangiocarcinoma |       | 68  | Female | Training/Discovery Phase |
| 99916                | Cholangiocarcinoma | pT2   | 68  | Female | Training/Discovery Phase |
| 99120                | Cholangiocarcinoma | pT3   | 68  | Female | Training/Discovery Phase |
| 41234                | Cholangiocarcinoma |       | 68  | Male   | Training/Discovery Phase |
| 52689                | Cholangiocarcinoma |       | 71  | Male   | Training/Discovery Phase |
| 98752                | Cholangiocarcinoma | pT3   | 71  | Male   | Training/Discovery Phase |
| 44312                | Cholangiocarcinoma |       | 72  | Male   | Training/Discovery Phase |
| 99024                | Cholangiocarcinoma | pT3   | 72  | Male   | Training/Discovery Phase |
| 52574                | Cholangiocarcinoma |       | 73  | Male   | Training/Discovery Phase |
| 99416                | Cholangiocarcinoma | pT1   | 73  | Male   | Training/Discovery Phase |
| 99897                | Cholangiocarcinoma | pT2   | 73  | Male   | Training/Discovery Phase |

| CE-MS<br>Analysis ID | Diagnosis                      | Stage | Age | Gender | Analytical Phase         |
|----------------------|--------------------------------|-------|-----|--------|--------------------------|
| 99975                | Cholangiocarcinoma             | pT2   | 73  | Male   | Training/Discovery Phase |
| 51708                | Cholangiocarcinoma             |       | 74  | Male   | Training/Discovery Phase |
| 41244                | Cholangiocarcinoma             |       | 74  | Male   | Training/Discovery Phase |
| 115357               | Cholangiocarcinoma             |       | 75  | Female | Training/Discovery Phase |
| 99412                | Cholangiocarcinoma             |       | 75  | Male   | Training/Discovery Phase |
| 38615                | Cholangiocarcinoma             |       | 76  | Male   | Training/Discovery Phase |
| 99130                | Cholangiocarcinoma             |       | 76  | Male   | Training/Discovery Phase |
| 99360                | Cholangiocarcinoma             |       | 77  | Female | Training/Discovery Phase |
| 99418                | Cholangiocarcinoma             | pT1   | 77  | Male   | Training/Discovery Phase |
| 41236                | Cholangiocarcinoma             |       | 78  | Female | Training/Discovery Phase |
| 115352               | Cholangiocarcinoma             |       | 78  | Male   | Training/Discovery Phase |
| 52592                | Cholangiocarcinoma             |       | 79  | Female | Training/Discovery Phase |
| 99908                | Cholangiocarcinoma             | pT2   | 79  | Female | Training/Discovery Phase |
| 98783                | Cholangiocarcinoma             |       | 79  | Male   | Training/Discovery Phase |
| 52591                | Cholangiocarcinoma             |       | 81  | Male   | Training/Discovery Phase |
| 52577                | Cholangiocarcinoma             |       |     |        | Training/Discovery Phase |
| 52579                | Cholangiocarcinoma             |       |     | Female | Training/Discovery Phase |
| 52572                | Cholangiocarcinoma             |       |     | Female | Training/Discovery Phase |
| 52600                | Cholangiocarcinoma             |       |     | Female | Training/Discovery Phase |
| 52944                | Cholangiocarcinoma             |       |     | Male   | Training/Discovery Phase |
| 52597                | Cholangiocarcinoma             |       |     | Male   | Training/Discovery Phase |
| 52590                | Cholangiocarcinoma             |       |     | Male   | Training/Discovery Phase |
| 52554                | Primary sclerosing cholangitis |       | 20  | Female | Training/Discovery Phase |
| 38665                | Primary sclerosing cholangitis |       | 22  | Male   | Training/Discovery Phase |
| 61033                | Primary sclerosing cholangitis |       | 23  | Male   | Training/Discovery Phase |
| 85456                | Primary sclerosing cholangitis |       | 24  | Male   | Training/Discovery Phase |
| 38671                | Primary sclerosing cholangitis |       | 26  | Female | Training/Discovery Phase |
| 73863                | Primary sclerosing cholangitis |       | 26  | Male   | Training/Discovery Phase |
| 38498                | Primary sclerosing cholangitis |       | 28  | Male   | Training/Discovery Phase |
| 52513                | Primary sclerosing cholangitis |       | 30  | Female | Training/Discovery Phase |
| 52553                | Primary sclerosing cholangitis |       | 31  | Male   | Training/Discovery Phase |
| 52549                | Primary sclerosing cholangitis |       | 31  | Male   | Training/Discovery Phase |
| 52550                | Primary sclerosing cholangitis |       | 35  | Male   | Training/Discovery Phase |
| 52535                | Primary sclerosing cholangitis |       | 35  |        | Training/Discovery Phase |
| 52534                | Primary sclerosing cholangitis |       | 37  | Male   | Training/Discovery Phase |
| 55615                | Primary sclerosing cholangitis |       | 37  | Female | Training/Discovery Phase |
| 56200                | Primary sclerosing cholangitis |       | 38  | Male   | Training/Discovery Phase |
| 38558                | Primary sclerosing cholangitis |       | 39  | Male   | Training/Discovery Phase |
| 80686                | Primary sclerosing cholangitis |       | 39  | Male   | Training/Discovery Phase |
| 38661                | Primary sclerosing cholangitis |       | 40  | Male   | Training/Discovery Phase |
| 89871                | Primary sclerosing cholangitis |       | 42  | Male   | Training/Discovery Phase |
| 52522                | Primary sclerosing cholangitis |       | 42  | Male   | Training/Discovery Phase |
| 52516                | Primary sclerosing cholangitis |       | 43  | Male   | Training/Discovery Phase |
| 38632                | Primary sclerosing cholangitis |       | 44  | Male   | Training/Discovery Phase |
| 38635                | Primary sclerosing cholangitis |       | 45  | Male   | Training/Discovery Phase |
| 38502                | Primary sclerosing cholangitis |       | 46  | Male   | Training/Discovery Phase |
| 55623                | Primary sclerosing cholangitis |       | 46  | Male   | Training/Discovery Phase |
| 38540                | Primary sclerosing cholangitis |       | 47  | Male   | Training/Discovery Phase |

| CE-MS<br>Analysis ID | Diagnosis                      | Stage | Age | Gender | Analytical Phase         |
|----------------------|--------------------------------|-------|-----|--------|--------------------------|
| 52544                | Primary sclerosing cholangitis |       | 47  | Male   | Training/Discovery Phase |
| 52738                | Primary sclerosing cholangitis |       | 48  | Male   | Training/Discovery Phase |
| 52533                | Primary sclerosing cholangitis |       | 50  | Male   | Training/Discovery Phase |
| 38662                | Primary sclerosing cholangitis |       | 50  | Male   | Training/Discovery Phase |
| 52514                | Primary sclerosing cholangitis |       | 51  | Male   | Training/Discovery Phase |
| 57860                | Primary sclerosing cholangitis |       | 51  | Male   | Training/Discovery Phase |
| 91456                | Primary sclerosing cholangitis |       | 51  | Female | Training/Discovery Phase |
| 52540                | Primary sclerosing cholangitis |       | 52  | Male   | Training/Discovery Phase |
| 38567                | Primary sclerosing cholangitis |       | 55  | Male   | Training/Discovery Phase |
| 38553                | Primary sclerosing cholangitis |       | 55  | Male   | Training/Discovery Phase |
| 52200                | Primary sclerosing cholangitis |       | 58  | Male   | Training/Discovery Phase |
| 52541                | Primary sclerosing cholangitis |       | 58  | Male   | Training/Discovery Phase |
| 38559                | Primary sclerosing cholangitis |       | 61  | Male   | Training/Discovery Phase |
| 52176                | Primary sclerosing cholangitis |       | 62  | Male   | Training/Discovery Phase |
| 52521                | Primary sclerosing cholangitis |       | 66  | Female | Training/Discovery Phase |
| 57862                | Primary sclerosing cholangitis |       | 83  | Female | Training/Discovery Phase |
| 109218               | Primary sclerosing cholangitis |       | 50  | Female | Training/Discovery Phase |
| 102873               | Primary sclerosing cholangitis |       | 34  | Male   | Training/Discovery Phase |
| 102879               | Primary sclerosing cholangitis |       | 45  | Female | Training/Discovery Phase |
| 41240                | Primary sclerosing cholangitis |       | 39  | Female | Training/Discovery Phase |
| 41241                | Primary sclerosing cholangitis |       | 35  | Female | Training/Discovery Phase |
| 41242                | Primary sclerosing cholangitis |       | 34  | Male   | Training/Discovery Phase |
| 93902                | Primary sclerosing cholangitis |       |     | Male   | Training/Discovery Phase |
| 91676                | Primary sclerosing cholangitis |       | 36  | Male   | Training/Discovery Phase |
| 38521                | Benign biliary disorders       |       | 37  | Female | Test/Validation Phase    |
| 38565                | Benign biliary disorders       |       | 38  | Male   | Test/Validation Phase    |
| 38551                | Benign biliary disorders       |       | 44  | Male   | Test/Validation Phase    |
| 38507                | Benign biliary disorders       |       | 46  | Female | Test/Validation Phase    |
| 38500                | Benign biliary disorders       |       | 49  | Female | Test/Validation Phase    |
| 52268                | Benign biliary disorders       |       | 55  | Female | Test/Validation Phase    |
| 52291                | Benign biliary disorders       |       | 59  | Female | Test/Validation Phase    |
| 38448                | Benign biliary disorders       |       | 61  | Male   | Test/Validation Phase    |
| 36222                | Benign biliary disorders       |       | 65  | Female | Test/Validation Phase    |
| 38584                | Benign biliary disorders       |       | 67  | Female | Test/Validation Phase    |
| 38630                | Benign biliary disorders       |       | 74  | Female | Test/Validation Phase    |
| 52225                | Benign biliary disorders       |       | 79  | Male   | Test/Validation Phase    |
| 38528                | Benign biliary disorders       |       | 81  | Female | Test/Validation Phase    |
| 52274                | Benign biliary disorders       |       | 85  | Male   | Test/Validation Phase    |
| 98754                | Benign biliary disorders       |       | 53  | Female | Test/Validation Phase    |
| 98949                | Benign biliary disorders       |       | 71  | Female | Test/Validation Phase    |
| 56497                | Cholangiocarcinoma             |       | 39  | Female | Test/Validation Phase    |
| 99928                | Cholangiocarcinoma             | pT1   | 48  | Female | Test/Validation Phase    |
| 36188                | Cholangiocarcinoma             |       | 49  | Female | Test/Validation Phase    |
| 99909                | Cholangiocarcinoma             |       | 59  | Female | Test/Validation Phase    |
| 44377                | Cholangiocarcinoma             |       | 59  | Female | Test/Validation Phase    |
| 98797                | Cholangiocarcinoma             |       | 64  | Female | Test/Validation Phase    |
| 38639                | Cholangiocarcinoma             |       | 69  | Female | Test/Validation Phase    |
| 90263                | Cholangiocarcinoma             |       | 73  | Female | Test/Validation Phase    |



| CE-MS<br>Analysis ID | Diagnosis                      | Stage | Age | Gender | Analytical Phase      |
|----------------------|--------------------------------|-------|-----|--------|-----------------------|
| 99905                | Cholangiocarcinoma             |       | 77  | Female | Test/Validation Phase |
| 99901                | Cholangiocarcinoma             |       | 82  | Female | Test/Validation Phase |
| 99124                | Cholangiocarcinoma             |       | 83  | Female | Test/Validation Phase |
| 52180                | Cholangiocarcinoma             |       | 30  | Male   | Test/Validation Phase |
| 51527                | Cholangiocarcinoma             |       | 43  | Male   | Test/Validation Phase |
| 38653                | Cholangiocarcinoma             |       | 46  | Male   | Test/Validation Phase |
| 36202                | Cholangiocarcinoma             | pT2   | 51  | Male   | Test/Validation Phase |
| 99702                | Cholangiocarcinoma             | pT2   | 51  | Male   | Test/Validation Phase |
| 99344                | Cholangiocarcinoma             | pT2   | 54  | Male   | Test/Validation Phase |
| 38688                | Cholangiocarcinoma             |       | 55  | Male   | Test/Validation Phase |
| 44281                | Cholangiocarcinoma             |       | 55  | Male   | Test/Validation Phase |
| 52589                | Cholangiocarcinoma             |       | 58  | Male   | Test/Validation Phase |
| 99129                | Cholangiocarcinoma             | pT3   | 58  | Male   | Test/Validation Phase |
| 51734                | Cholangiocarcinoma             |       | 59  | Male   | Test/Validation Phase |
| 93937                | Cholangiocarcinoma             | pT2   | 60  | Male   | Test/Validation Phase |
| 99903                | Cholangiocarcinoma             | pT1   | 62  | Male   | Test/Validation Phase |
| 99605                | Cholangiocarcinoma             |       | 62  | Male   | Test/Validation Phase |
| 38617                | Cholangiocarcinoma             |       | 63  | Male   | Test/Validation Phase |
| 38658                | Cholangiocarcinoma             |       | 64  | Male   | Test/Validation Phase |
| 52185                | Cholangiocarcinoma             |       | 67  | Male   | Test/Validation Phase |
| 99339                | Cholangiocarcinoma             | pT2   | 69  | Male   | Test/Validation Phase |
| 99220                | Cholangiocarcinoma             |       | 73  | Male   | Test/Validation Phase |
| 99652                | Cholangiocarcinoma             | pT1   | 74  | Male   | Test/Validation Phase |
| 38670                | Cholangiocarcinoma             |       | 78  | Male   | Test/Validation Phase |
| 99561                | Cholangiocarcinoma             |       | 78  | Male   | Test/Validation Phase |
| 44310                | Cholangiocarcinoma             |       | 79  | Male   | Test/Validation Phase |
| 99029                | Cholangiocarcinoma             | pT2   | 79  | Male   | Test/Validation Phase |
| 52739                | Cholangiocarcinoma             |       | 86  | Male   | Test/Validation Phase |
| 52538                | Primary sclerosing cholangitis |       | 22  | Male   | Test/Validation Phase |
| 76574                | Primary sclerosing cholangitis |       | 25  | Male   | Test/Validation Phase |
| 68439                | Primary sclerosing cholangitis |       | 30  | Male   | Test/Validation Phase |
| 55295                | Primary sclerosing cholangitis |       | 33  | Male   | Test/Validation Phase |
| 76142                | Primary sclerosing cholangitis |       | 36  | Male   | Test/Validation Phase |
| 52285                | Primary sclerosing cholangitis |       | 38  | Male   | Test/Validation Phase |
| 52557                | Primary sclerosing cholangitis |       | 39  | Male   | Test/Validation Phase |
| 58613                | Primary sclerosing cholangitis |       | 42  | Male   | Test/Validation Phase |
| 53805                | Primary sclerosing cholangitis |       | 44  | Male   | Test/Validation Phase |
| 52559                | Primary sclerosing cholangitis |       | 46  | Male   | Test/Validation Phase |
| 52519                | Primary sclerosing cholangitis |       | 47  | Male   | Test/Validation Phase |
| 65499                | Primary sclerosing cholangitis |       | 49  | Male   | Test/Validation Phase |
| 38669                | Primary sclerosing cholangitis |       | 51  | Male   | Test/Validation Phase |
| 91164                | Primary sclerosing cholangitis |       | 51  | Male   | Test/Validation Phase |
| 76588                | Primary sclerosing cholangitis |       | 52  | Female | Test/Validation Phase |
| 52551                | Primary sclerosing cholangitis |       | 56  | Male   | Test/Validation Phase |
| 38499                | Primary sclerosing cholangitis |       | 60  | Female | Test/Validation Phase |
| 38524                | Primary sclerosing cholangitis |       | 64  | Female | Test/Validation Phase |
| 109192               | Primary sclerosing cholangitis |       | 37  | Male   | Test/Validation Phase |
| 102874               | Primary sclerosing cholangitis |       | 47  | Male   | Test/Validation Phase |

| <b>CE-MS<br/>Analysis ID</b> | <b>Diagnosis</b>               | <b>Stage</b> | <b>Age</b> | <b>Gender</b> | <b>Analytical Phase</b> |
|------------------------------|--------------------------------|--------------|------------|---------------|-------------------------|
| 41243                        | Primary sclerosing cholangitis |              | 46         | Male          | Test/Validation Phase   |
| 74718                        | Primary sclerosing cholangitis |              | 45         | Male          | Test/Validation Phase   |
| 93813                        | Primary sclerosing cholangitis |              | 31         | Female        | Test/Validation Phase   |

**Supplementary Table S4. Spreadsheet 6.** Characterization of control set of health individuals (n=331).

| CE-MS Analysis ID | Diagnosis          | Age | Gender | Analytical Phase         |
|-------------------|--------------------|-----|--------|--------------------------|
| 22028             | Healthy Individual | 19  | Female | Training/Discovery Phase |
| 64130             | Healthy Individual | 21  | Male   | Training/Discovery Phase |
| 9482              | Healthy Individual | 23  | Female | Training/Discovery Phase |
| 9498              | Healthy Individual | 24  | Female | Training/Discovery Phase |
| 64051             | Healthy Individual | 27  | Male   | Training/Discovery Phase |
| 63749             | Healthy Individual | 28  | Male   | Training/Discovery Phase |
| 63860             | Healthy Individual | 29  | Male   | Training/Discovery Phase |
| 20752             | Healthy Individual | 30  | Female | Training/Discovery Phase |
| 63841             | Healthy Individual | 31  | Female | Training/Discovery Phase |
| 87755             | Healthy Individual | 31  | Female | Training/Discovery Phase |
| 9407              | Healthy Individual | 33  | Female | Training/Discovery Phase |
| 63696             | Healthy Individual | 33  | Female | Training/Discovery Phase |
| 87915             | Healthy Individual | 34  | Male   | Training/Discovery Phase |
| 9488              | Healthy Individual | 35  | Female | Training/Discovery Phase |
| 87788             | Healthy Individual | 36  | Female | Training/Discovery Phase |
| 63581             | Healthy Individual | 37  | Female | Training/Discovery Phase |
| 16132             | Healthy Individual | 38  | Male   | Training/Discovery Phase |
| 63976             | Healthy Individual | 38  | Male   | Training/Discovery Phase |
| 57789             | Healthy Individual | 39  | Female | Training/Discovery Phase |
| 88066             | Healthy Individual | 40  | Female | Training/Discovery Phase |
| 39289             | Healthy Individual | 41  | Male   | Training/Discovery Phase |
| 63946             | Healthy Individual | 41  | Male   | Training/Discovery Phase |
| 39322             | Healthy Individual | 42  | Male   | Training/Discovery Phase |
| 39247             | Healthy Individual | 43  | Male   | Training/Discovery Phase |
| 39281             | Healthy Individual | 43  | Male   | Training/Discovery Phase |
| 63530             | Healthy Individual | 43  | Male   | Training/Discovery Phase |
| 39249             | Healthy Individual | 44  | Male   | Training/Discovery Phase |
| 39244             | Healthy Individual | 45  | Female | Training/Discovery Phase |
| 63598             | Healthy Individual | 45  | Female | Training/Discovery Phase |
| 39305             | Healthy Individual | 45  | Male   | Training/Discovery Phase |
| 37125             | Healthy Individual | 46  | Female | Training/Discovery Phase |
| 39302             | Healthy Individual | 47  | Female | Training/Discovery Phase |
| 63951             | Healthy Individual | 47  | Male   | Training/Discovery Phase |
| 39313             | Healthy Individual | 48  | Male   | Training/Discovery Phase |
| 39270             | Healthy Individual | 49  | Male   | Training/Discovery Phase |
| 41754             | Healthy Individual | 50  | Male   | Training/Discovery Phase |
| 39318             | Healthy Individual | 51  | Female | Training/Discovery Phase |
| 87924             | Healthy Individual | 51  | Male   | Training/Discovery Phase |
| 27120             | Healthy Individual | 52  | Female | Training/Discovery Phase |
| 63802             | Healthy Individual | 52  | Female | Training/Discovery Phase |
| 63836             | Healthy Individual | 53  | Female | Training/Discovery Phase |
| 39293             | Healthy Individual | 54  | Female | Training/Discovery Phase |
| 63814             | Healthy Individual | 54  | Male   | Training/Discovery Phase |
| 63992             | Healthy Individual | 54  | Male   | Training/Discovery Phase |
| 39246             | Healthy Individual | 55  | Female | Training/Discovery Phase |
| 39304             | Healthy Individual | 55  | Female | Training/Discovery Phase |

| CE-MS Analysis ID | Diagnosis          | Age | Gender | Analytical Phase         |
|-------------------|--------------------|-----|--------|--------------------------|
| 48824             | Healthy Individual | 55  | Female | Training/Discovery Phase |
| 63832             | Healthy Individual | 55  | Female | Training/Discovery Phase |
| 88059             | Healthy Individual | 55  | Male   | Training/Discovery Phase |
| 88096             | Healthy Individual | 55  | Male   | Training/Discovery Phase |
| 39256             | Healthy Individual | 56  | Female | Training/Discovery Phase |
| 39324             | Healthy Individual | 56  | Female | Training/Discovery Phase |
| 63713             | Healthy Individual | 56  | Female | Training/Discovery Phase |
| 88060             | Healthy Individual | 56  | Female | Training/Discovery Phase |
| 16380             | Healthy Individual | 56  | Male   | Training/Discovery Phase |
| 16160             | Healthy Individual | 56  | Male   | Training/Discovery Phase |
| 39294             | Healthy Individual | 56  | Male   | Training/Discovery Phase |
| 64049             | Healthy Individual | 56  | Male   | Training/Discovery Phase |
| 39258             | Healthy Individual | 57  | Female | Training/Discovery Phase |
| 39300             | Healthy Individual | 57  | Female | Training/Discovery Phase |
| 39337             | Healthy Individual | 57  | Female | Training/Discovery Phase |
| 48830             | Healthy Individual | 57  | Female | Training/Discovery Phase |
| 48838             | Healthy Individual | 57  | Female | Training/Discovery Phase |
| 49366             | Healthy Individual | 57  | Female | Training/Discovery Phase |
| 49391             | Healthy Individual | 57  | Female | Training/Discovery Phase |
| 88065             | Healthy Individual | 57  | Female | Training/Discovery Phase |
| 37799             | Healthy Individual | 57  | Male   | Training/Discovery Phase |
| 9336              | Healthy Individual | 57  | Male   | Training/Discovery Phase |
| 39278             | Healthy Individual | 57  | Male   | Training/Discovery Phase |
| 37806             | Healthy Individual | 58  | Female | Training/Discovery Phase |
| 39279             | Healthy Individual | 58  | Female | Training/Discovery Phase |
| 21627             | Healthy Individual | 58  | Male   | Training/Discovery Phase |
| 17128             | Healthy Individual | 58  | Male   | Training/Discovery Phase |
| 63714             | Healthy Individual | 58  | Male   | Training/Discovery Phase |
| 64040             | Healthy Individual | 58  | Male   | Training/Discovery Phase |
| 39273             | Healthy Individual | 59  | Female | Training/Discovery Phase |
| 39306             | Healthy Individual | 59  | Female | Training/Discovery Phase |
| 49242             | Healthy Individual | 59  | Female | Training/Discovery Phase |
| 63584             | Healthy Individual | 59  | Female | Training/Discovery Phase |
| 37652             | Healthy Individual | 59  | Male   | Training/Discovery Phase |
| 9402              | Healthy Individual | 59  | Male   | Training/Discovery Phase |
| 63811             | Healthy Individual | 59  | Male   | Training/Discovery Phase |
| 87918             | Healthy Individual | 60  | Male   | Training/Discovery Phase |
| 39349             | Healthy Individual | 60  | Male   | Training/Discovery Phase |
| 27290             | Healthy Individual | 61  | Female | Training/Discovery Phase |
| 88064             | Healthy Individual | 61  | Female | Training/Discovery Phase |
| 63817             | Healthy Individual | 61  | Male   | Training/Discovery Phase |
| 16395             | Healthy Individual | 62  | Female | Training/Discovery Phase |
| 63722             | Healthy Individual | 62  | Female | Training/Discovery Phase |
| 9331              | Healthy Individual | 62  | Male   | Training/Discovery Phase |
| 87902             | Healthy Individual | 62  | Male   | Training/Discovery Phase |
| 39469             | Healthy Individual | 62  | Male   | Training/Discovery Phase |
| 69857             | Healthy Individual | 62  | Male   | Training/Discovery Phase |
| 9409              | Healthy Individual | 63  | Female | Training/Discovery Phase |

| CE-MS Analysis ID | Diagnosis          | Age | Gender | Analytical Phase         |
|-------------------|--------------------|-----|--------|--------------------------|
| 17117             | Healthy Individual | 63  | Male   | Training/Discovery Phase |
| 41755             | Healthy Individual | 63  | Male   | Training/Discovery Phase |
| 37796             | Healthy Individual | 64  | Female | Training/Discovery Phase |
| 63830             | Healthy Individual | 64  | Female | Training/Discovery Phase |
| 37617             | Healthy Individual | 64  | Male   | Training/Discovery Phase |
| 9328              | Healthy Individual | 64  | Male   | Training/Discovery Phase |
| 24154             | Healthy Individual | 65  | Female | Training/Discovery Phase |
| 37640             | Healthy Individual | 65  | Female | Training/Discovery Phase |
| 64119             | Healthy Individual | 65  | Female | Training/Discovery Phase |
| 37558             | Healthy Individual | 65  | Male   | Training/Discovery Phase |
| 37606             | Healthy Individual | 65  | Male   | Training/Discovery Phase |
| 37611             | Healthy Individual | 65  | Male   | Training/Discovery Phase |
| 37585             | Healthy Individual | 66  | Female | Training/Discovery Phase |
| 37591             | Healthy Individual | 66  | Female | Training/Discovery Phase |
| 37615             | Healthy Individual | 66  | Female | Training/Discovery Phase |
| 37624             | Healthy Individual | 66  | Female | Training/Discovery Phase |
| 21662             | Healthy Individual | 67  | Female | Training/Discovery Phase |
| 37573             | Healthy Individual | 67  | Female | Training/Discovery Phase |
| 37645             | Healthy Individual | 67  | Male   | Training/Discovery Phase |
| 37646             | Healthy Individual | 67  | Male   | Training/Discovery Phase |
| 21663             | Healthy Individual | 68  | Female | Training/Discovery Phase |
| 16362             | Healthy Individual | 68  | Male   | Training/Discovery Phase |
| 37575             | Healthy Individual | 69  | Female | Training/Discovery Phase |
| 37554             | Healthy Individual | 69  | Male   | Training/Discovery Phase |
| 37653             | Healthy Individual | 69  | Male   | Training/Discovery Phase |
| 16351             | Healthy Individual | 69  | Male   | Training/Discovery Phase |
| 87927             | Healthy Individual | 69  | Male   | Training/Discovery Phase |
| 37584             | Healthy Individual | 70  | Female | Training/Discovery Phase |
| 37702             | Healthy Individual | 70  | Female | Training/Discovery Phase |
| 37593             | Healthy Individual | 70  | Male   | Training/Discovery Phase |
| 16363             | Healthy Individual | 70  | Male   | Training/Discovery Phase |
| 37570             | Healthy Individual | 71  | Female | Training/Discovery Phase |
| 37587             | Healthy Individual | 71  | Female | Training/Discovery Phase |
| 37686             | Healthy Individual | 71  | Female | Training/Discovery Phase |
| 37934             | Healthy Individual | 71  | Female | Training/Discovery Phase |
| 63998             | Healthy Individual | 71  | Female | Training/Discovery Phase |
| 21678             | Healthy Individual | 71  | Male   | Training/Discovery Phase |
| 37933             | Healthy Individual | 71  | Male   | Training/Discovery Phase |
| 37601             | Healthy Individual | 72  | Female | Training/Discovery Phase |
| 37620             | Healthy Individual | 72  | Male   | Training/Discovery Phase |
| 37677             | Healthy Individual | 72  | Male   | Training/Discovery Phase |
| 37618             | Healthy Individual | 73  | Female | Training/Discovery Phase |
| 17346             | Healthy Individual | 73  | Female | Training/Discovery Phase |
| 37651             | Healthy Individual | 73  | Male   | Training/Discovery Phase |
| 37553             | Healthy Individual | 74  | Female | Training/Discovery Phase |
| 37556             | Healthy Individual | 74  | Female | Training/Discovery Phase |
| 37637             | Healthy Individual | 74  | Female | Training/Discovery Phase |
| 37555             | Healthy Individual | 75  | Female | Training/Discovery Phase |

| CE-MS Analysis ID | Diagnosis          | Age | Gender | Analytical Phase         |
|-------------------|--------------------|-----|--------|--------------------------|
| 37643             | Healthy Individual | 75  | Female | Training/Discovery Phase |
| 37650             | Healthy Individual | 75  | Male   | Training/Discovery Phase |
| 37595             | Healthy Individual | 76  | Female | Training/Discovery Phase |
| 37557             | Healthy Individual | 76  | Male   | Training/Discovery Phase |
| 21668             | Healthy Individual | 77  | Female | Training/Discovery Phase |
| 63995             | Healthy Individual | 77  | Female | Training/Discovery Phase |
| 37559             | Healthy Individual | 78  | Female | Training/Discovery Phase |
| 37572             | Healthy Individual | 78  | Female | Training/Discovery Phase |
| 21686             | Healthy Individual | 78  | Male   | Training/Discovery Phase |
| 37613             | Healthy Individual | 78  | Male   | Training/Discovery Phase |
| 37743             | Healthy Individual | 78  | Male   | Training/Discovery Phase |
| 37681             | Healthy Individual | 79  | Female | Training/Discovery Phase |
| 37596             | Healthy Individual | 79  | Male   | Training/Discovery Phase |
| 37562             | Healthy Individual | 80  | Female | Training/Discovery Phase |
| 37588             | Healthy Individual | 80  | Male   | Training/Discovery Phase |
| 37795             | Healthy Individual | 81  | Female | Training/Discovery Phase |
| 37552             | Healthy Individual | 81  | Male   | Training/Discovery Phase |
| 37614             | Healthy Individual | 81  | Male   | Training/Discovery Phase |
| 37642             | Healthy Individual | 81  | Male   | Training/Discovery Phase |
| 37592             | Healthy Individual | 82  | Female | Training/Discovery Phase |
| 21795             | Healthy Individual | 83  | Female | Training/Discovery Phase |
| 37571             | Healthy Individual | 84  | Female | Training/Discovery Phase |
| 37794             | Healthy Individual | 84  | Female | Training/Discovery Phase |
| 37896             | Healthy Individual | 84  | Male   | Training/Discovery Phase |
| 37886             | Healthy Individual | 86  | Female | Training/Discovery Phase |
| 9505              | Healthy Individual | 22  | Female | Test/Validation Phase    |
| 63933             | Healthy Individual | 25  | Male   | Test/Validation Phase    |
| 20748             | Healthy Individual | 28  | Male   | Test/Validation Phase    |
| 69853             | Healthy Individual | 30  | Male   | Test/Validation Phase    |
| 37134             | Healthy Individual | 32  | Male   | Test/Validation Phase    |
| 63960             | Healthy Individual | 34  | Male   | Test/Validation Phase    |
| 63726             | Healthy Individual | 36  | Male   | Test/Validation Phase    |
| 9503              | Healthy Individual | 37  | Female | Test/Validation Phase    |
| 63683             | Healthy Individual | 39  | Male   | Test/Validation Phase    |
| 39260             | Healthy Individual | 40  | Male   | Test/Validation Phase    |
| 64239             | Healthy Individual | 42  | Male   | Test/Validation Phase    |
| 39271             | Healthy Individual | 43  | Male   | Test/Validation Phase    |
| 64038             | Healthy Individual | 44  | Female | Test/Validation Phase    |
| 39275             | Healthy Individual | 45  | Male   | Test/Validation Phase    |
| 63676             | Healthy Individual | 45  | Male   | Test/Validation Phase    |
| 63718             | Healthy Individual | 46  | Female | Test/Validation Phase    |
| 63796             | Healthy Individual | 47  | Female | Test/Validation Phase    |
| 39290             | Healthy Individual | 49  | Male   | Test/Validation Phase    |
| 64116             | Healthy Individual | 50  | Female | Test/Validation Phase    |
| 39282             | Healthy Individual | 51  | Female | Test/Validation Phase    |
| 63728             | Healthy Individual | 52  | Female | Test/Validation Phase    |
| 64053             | Healthy Individual | 53  | Female | Test/Validation Phase    |
| 39268             | Healthy Individual | 54  | Female | Test/Validation Phase    |

| <b>CE-MS Analysis ID</b> | <b>Diagnosis</b>   | <b>Age</b> | <b>Gender</b> | <b>Analytical Phase</b> |
|--------------------------|--------------------|------------|---------------|-------------------------|
| 9308                     | Healthy Individual | 55         | Female        | Test/Validation Phase   |
| 48841                    | Healthy Individual | 55         | Female        | Test/Validation Phase   |
| 63894                    | Healthy Individual | 55         | Female        | Test/Validation Phase   |
| 39304                    | Healthy Individual | 55         | Female        | Test/Validation Phase   |
| 37854                    | Healthy Individual | 56         | Female        | Test/Validation Phase   |
| 63913                    | Healthy Individual | 56         | Female        | Test/Validation Phase   |
| 88067                    | Healthy Individual | 56         | Female        | Test/Validation Phase   |
| 39324                    | Healthy Individual | 56         | Female        | Test/Validation Phase   |
| 39294                    | Healthy Individual | 56         | Male          | Test/Validation Phase   |
| 39284                    | Healthy Individual | 57         | Female        | Test/Validation Phase   |
| 39258                    | Healthy Individual | 57         | Female        | Test/Validation Phase   |
| 39337                    | Healthy Individual | 57         | Female        | Test/Validation Phase   |
| 37902                    | Healthy Individual | 57         | Male          | Test/Validation Phase   |
| 27125                    | Healthy Individual | 57         | Male          | Test/Validation Phase   |
| 39321                    | Healthy Individual | 57         | Male          | Test/Validation Phase   |
| 21674                    | Healthy Individual | 58         | Female        | Test/Validation Phase   |
| 39320                    | Healthy Individual | 58         | Female        | Test/Validation Phase   |
| 39306                    | Healthy Individual | 59         | Female        | Test/Validation Phase   |
| 49242                    | Healthy Individual | 59         | Female        | Test/Validation Phase   |
| 63905                    | Healthy Individual | 59         | Male          | Test/Validation Phase   |
| 39283                    | Healthy Individual | 60         | Male          | Test/Validation Phase   |
| 37798                    | Healthy Individual | 61         | Female        | Test/Validation Phase   |
| 63952                    | Healthy Individual | 61         | Female        | Test/Validation Phase   |
| 37329                    | Healthy Individual | 62         | Male          | Test/Validation Phase   |
| 39274                    | Healthy Individual | 62         | Male          | Test/Validation Phase   |
| 63970                    | Healthy Individual | 63         | Female        | Test/Validation Phase   |
| 37793                    | Healthy Individual | 63         | Male          | Test/Validation Phase   |
| 16142                    | Healthy Individual | 63         | Male          | Test/Validation Phase   |
| 37583                    | Healthy Individual | 65         | Male          | Test/Validation Phase   |
| 37771                    | Healthy Individual | 65         | Male          | Test/Validation Phase   |
| 87928                    | Healthy Individual | 65         | Male          | Test/Validation Phase   |
| 37568                    | Healthy Individual | 66         | Female        | Test/Validation Phase   |
| 63949                    | Healthy Individual | 66         | Female        | Test/Validation Phase   |
| 63732                    | Healthy Individual | 67         | Female        | Test/Validation Phase   |
| 37551                    | Healthy Individual | 67         | Male          | Test/Validation Phase   |
| 37582                    | Healthy Individual | 68         | Female        | Test/Validation Phase   |
| 26849                    | Healthy Individual | 68         | Male          | Test/Validation Phase   |
| 37904                    | Healthy Individual | 69         | Female        | Test/Validation Phase   |
| 16352                    | Healthy Individual | 69         | Male          | Test/Validation Phase   |
| 37792                    | Healthy Individual | 70         | Female        | Test/Validation Phase   |
| 37576                    | Healthy Individual | 70         | Male          | Test/Validation Phase   |
| 87930                    | Healthy Individual | 70         | Male          | Test/Validation Phase   |
| 21672                    | Healthy Individual | 71         | Female        | Test/Validation Phase   |
| 37616                    | Healthy Individual | 71         | Female        | Test/Validation Phase   |
| 17118                    | Healthy Individual | 71         | Female        | Test/Validation Phase   |
| 37567                    | Healthy Individual | 71         | Male          | Test/Validation Phase   |
| 37921                    | Healthy Individual | 72         | Female        | Test/Validation Phase   |
| 37679                    | Healthy Individual | 72         | Male          | Test/Validation Phase   |

| CE-MS Analysis ID | Diagnosis                       | Age | Gender | Analytical Phase         |
|-------------------|---------------------------------|-----|--------|--------------------------|
| 63794             | Healthy Individual              | 72  | Male   | Test/Validation Phase    |
| 37882             | Healthy Individual              | 74  | Female | Test/Validation Phase    |
| 21712             | Healthy Individual              | 74  | Male   | Test/Validation Phase    |
| 37636             | Healthy Individual              | 75  | Male   | Test/Validation Phase    |
| 37594             | Healthy Individual              | 76  | Female | Test/Validation Phase    |
| 37589             | Healthy Individual              | 76  | Male   | Test/Validation Phase    |
| 21629             | Healthy Individual              | 77  | Female | Test/Validation Phase    |
| 37602             | Healthy Individual              | 77  | Female | Test/Validation Phase    |
| 21626             | Healthy Individual              | 78  | Female | Test/Validation Phase    |
| 37914             | Healthy Individual              | 78  | Female | Test/Validation Phase    |
| 37901             | Healthy Individual              | 79  | Male   | Test/Validation Phase    |
| 37574             | Healthy Individual              | 80  | Male   | Test/Validation Phase    |
| 9403              | Healthy Individual              | 81  | Female | Test/Validation Phase    |
| 37590             | Healthy Individual              | 81  | Male   | Test/Validation Phase    |
| 21726             | Healthy Individual              | 82  | Female | Test/Validation Phase    |
| 37641             | Healthy Individual              | 83  | Female | Test/Validation Phase    |
| 37887             | Healthy Individual              | 84  | Female | Test/Validation Phase    |
| 20706             | Healthy Individual              | 86  | Male   | Test/Validation Phase    |
| 69673             | Individual with smoking history | 19  | Female | Training/Discovery Phase |
| 9447              | Individual with smoking history | 20  | Female | Training/Discovery Phase |
| 9475              | Individual with smoking history | 20  | Male   | Training/Discovery Phase |
| 9490              | Individual with smoking history | 22  | Female | Training/Discovery Phase |
| 10808             | Individual with smoking history | 22  | Female | Training/Discovery Phase |
| 10809             | Individual with smoking history | 23  | Female | Training/Discovery Phase |
| 87793             | Individual with smoking history | 23  | Female | Training/Discovery Phase |
| 9474              | Individual with smoking history | 24  | Female | Training/Discovery Phase |
| 10814             | Individual with smoking history | 25  | Female | Training/Discovery Phase |
| 10813             | Individual with smoking history | 25  | Male   | Training/Discovery Phase |
| 87762             | Individual with smoking history | 25  | Male   | Training/Discovery Phase |
| 9485              | Individual with smoking history | 26  | Male   | Training/Discovery Phase |
| 10817             | Individual with smoking history | 27  | Female | Training/Discovery Phase |
| 69667             | Individual with smoking history | 27  | Female | Training/Discovery Phase |
| 10810             | Individual with smoking history | 29  | Female | Training/Discovery Phase |
| 69678             | Individual with smoking history | 29  | Female | Training/Discovery Phase |
| 10812             | Individual with smoking history | 31  | Female | Training/Discovery Phase |
| 9491              | Individual with smoking history | 33  | Female | Training/Discovery Phase |
| 87949             | Individual with smoking history | 33  | Male   | Training/Discovery Phase |
| 9477              | Individual with smoking history | 34  | Female | Training/Discovery Phase |
| 9469              | Individual with smoking history | 38  | Female | Training/Discovery Phase |
| 36499             | Individual with smoking history | 40  | Female | Training/Discovery Phase |
| 50511             | Individual with smoking history | 44  | Female | Training/Discovery Phase |
| 50574             | Individual with smoking history | 44  | Female | Training/Discovery Phase |
| 9479              | Individual with smoking history | 45  | Male   | Training/Discovery Phase |
| 37339             | Individual with smoking history | 46  | Female | Training/Discovery Phase |
| 37872             | Individual with smoking history | 47  | Male   | Training/Discovery Phase |
| 50372             | Individual with smoking history | 50  | Male   | Training/Discovery Phase |
| 50378             | Individual with smoking history | 51  | Male   | Training/Discovery Phase |
| 50521             | Individual with smoking history | 51  | Female | Training/Discovery Phase |



| CE-MS Analysis ID | Diagnosis                       | Age | Gender | Analytical Phase         |
|-------------------|---------------------------------|-----|--------|--------------------------|
| 87938             | Individual with smoking history | 52  | Female | Training/Discovery Phase |
| 36675             | Individual with smoking history | 52  | Male   | Training/Discovery Phase |
| 73188             | Individual with smoking history | 52  | Male   | Training/Discovery Phase |
| 50379             | Individual with smoking history | 52  | Male   | Training/Discovery Phase |
| 9451              | Individual with smoking history | 53  | Female | Training/Discovery Phase |
| 50502             | Individual with smoking history | 54  | Female | Training/Discovery Phase |
| 36627             | Individual with smoking history | 54  | Female | Training/Discovery Phase |
| 36495             | Individual with smoking history | 55  | Male   | Training/Discovery Phase |
| 50528             | Individual with smoking history | 56  | Female | Training/Discovery Phase |
| 36626             | Individual with smoking history | 56  | Male   | Training/Discovery Phase |
| 37505             | Individual with smoking history | 57  | Male   | Training/Discovery Phase |
| 50564             | Individual with smoking history | 58  | Female | Training/Discovery Phase |
| 50358             | Individual with smoking history | 58  | Male   | Training/Discovery Phase |
| 55765             | Individual with smoking history | 58  | Male   | Training/Discovery Phase |
| 50611             | Individual with smoking history | 62  | Male   | Training/Discovery Phase |
| 50532             | Individual with smoking history | 63  | Male   | Training/Discovery Phase |
| 37835             | Individual with smoking history | 64  | Male   | Training/Discovery Phase |
| 73208             | Individual with smoking history | 65  | Male   | Training/Discovery Phase |
| 36503             | Individual with smoking history | 66  | Male   | Training/Discovery Phase |
| 73228             | Individual with smoking history | 68  | Female | Training/Discovery Phase |
| 37501             | Individual with smoking history | 72  | Male   | Training/Discovery Phase |
| 9472              | Individual with smoking history | 20  | Female | Test/Validation Phase    |
| 10811             | Individual with smoking history | 22  | Female | Test/Validation Phase    |
| 69695             | Individual with smoking history | 23  | Female | Test/Validation Phase    |
| 9499              | Individual with smoking history | 24  | Female | Test/Validation Phase    |
| 9468              | Individual with smoking history | 25  | Male   | Test/Validation Phase    |
| 9473              | Individual with smoking history | 25  | Male   | Test/Validation Phase    |
| 9483              | Individual with smoking history | 27  | Female | Test/Validation Phase    |
| 9489              | Individual with smoking history | 33  | Female | Test/Validation Phase    |
| 10819             | Individual with smoking history | 36  | Female | Test/Validation Phase    |
| 55760             | Individual with smoking history | 42  | Male   | Test/Validation Phase    |
| 55761             | Individual with smoking history | 45  | Male   | Test/Validation Phase    |
| 37865             | Individual with smoking history | 46  | Female | Test/Validation Phase    |
| 36678             | Individual with smoking history | 50  | Male   | Test/Validation Phase    |
| 9506              | Individual with smoking history | 54  | Female | Test/Validation Phase    |
| 37085             | Individual with smoking history | 54  | Female | Test/Validation Phase    |
| 73193             | Individual with smoking history | 56  | Male   | Test/Validation Phase    |
| 9443              | Individual with smoking history | 57  | Female | Test/Validation Phase    |
| 10807             | Individual with smoking history | 60  | Male   | Test/Validation Phase    |
| 37745             | Individual with smoking history | 62  | Male   | Test/Validation Phase    |
| 73199             | Individual with smoking history | 63  | Male   | Test/Validation Phase    |
| 55782             | Individual with smoking history | 64  | Male   | Test/Validation Phase    |
| 55840             | Individual with smoking history | 67  | Female | Test/Validation Phase    |
| 37836             | Individual with smoking history | 68  | Male   | Test/Validation Phase    |
| 36622             | Individual with smoking history | 72  | Female | Test/Validation Phase    |

**Supplementary Table S4. Spreadsheet 7.** Characterisation of control set of patients with inflammatory diseases (n=199).

| CE-MS<br>Analysis ID | Diagnosis            | Age | Gender | Analytical Phase         |
|----------------------|----------------------|-----|--------|--------------------------|
| 36410                | Arteriosclerosis     | 51  | Male   | Training/Discovery Phase |
| 37840                | Arteriosclerosis     | 74  | Female | Training/Discovery Phase |
| 49494                | IgA nephropathy      | 16  | Male   | Training/Discovery Phase |
| 49534                | IgA nephropathy      | 16  | Male   | Training/Discovery Phase |
| 22775                | IgA nephropathy      | 17  | Male   | Training/Discovery Phase |
| 49484                | IgA nephropathy      | 19  | Female | Training/Discovery Phase |
| 49492                | IgA nephropathy      | 19  | Female | Training/Discovery Phase |
| 61966                | IgA nephropathy      | 19  | Male   | Training/Discovery Phase |
| 49518                | IgA nephropathy      | 22  | Male   | Training/Discovery Phase |
| 61973                | IgA nephropathy      | 22  | Male   | Training/Discovery Phase |
| 49480                | IgA nephropathy      | 23  | Male   | Training/Discovery Phase |
| 20199                | IgA nephropathy      | 24  | Female | Training/Discovery Phase |
| 27876                | IgA nephropathy      | 24  | Female | Training/Discovery Phase |
| 49546                | IgA nephropathy      | 24  | Female | Training/Discovery Phase |
| 27943                | IgA nephropathy      | 25  | Female | Training/Discovery Phase |
| 20059                | IgA nephropathy      | 25  | Male   | Training/Discovery Phase |
| 22774                | IgA nephropathy      | 26  | Female | Training/Discovery Phase |
| 49481                | IgA nephropathy      | 26  | Male   | Training/Discovery Phase |
| 49516                | IgA nephropathy      | 27  | Male   | Training/Discovery Phase |
| 22780                | IgA nephropathy      | 28  | Female | Training/Discovery Phase |
| 49564                | IgA nephropathy      | 29  | Male   | Training/Discovery Phase |
| 27705                | IgA nephropathy      | 30  | Female | Training/Discovery Phase |
| 49532                | IgA nephropathy      | 30  | Female | Training/Discovery Phase |
| 20071                | IgA nephropathy      | 30  | Male   | Training/Discovery Phase |
| 49487                | IgA nephropathy      | 30  | Male   | Training/Discovery Phase |
| 22778                | IgA nephropathy      | 31  | Female | Training/Discovery Phase |
| 49533                | IgA nephropathy      | 33  | Female | Training/Discovery Phase |
| 27848                | IgA nephropathy      | 33  | Male   | Training/Discovery Phase |
| 49495                | IgA nephropathy      | 34  | Female | Training/Discovery Phase |
| 49548                | IgA nephropathy      | 34  | Male   | Training/Discovery Phase |
| 61970                | IgA nephropathy      | 35  | Male   | Training/Discovery Phase |
| 22928                | IgA nephropathy      | 36  | Male   | Training/Discovery Phase |
| 23122                | IgA nephropathy      | 36  | Male   | Training/Discovery Phase |
| 27911                | IgA nephropathy      | 38  | Female | Training/Discovery Phase |
| 61967                | IgA nephropathy      | 38  | Female | Training/Discovery Phase |
| 27706                | IgA nephropathy      | 41  | Female | Training/Discovery Phase |
| 49531                | IgA nephropathy      | 42  | Male   | Training/Discovery Phase |
| 49493                | IgA nephropathy      | 44  | Female | Training/Discovery Phase |
| 22772                | IgA nephropathy      | 45  | Female | Training/Discovery Phase |
| 22805                | IgA nephropathy      | 45  | Male   | Training/Discovery Phase |
| 27802                | IgA nephropathy      | 45  | Male   | Training/Discovery Phase |
| 49529                | IgA nephropathy      | 45  | Male   | Training/Discovery Phase |
| 27804                | IgA nephropathy      | 48  | Male   | Training/Discovery Phase |
| 27778                | IgA nephropathy      | 51  | Male   | Training/Discovery Phase |
| 27707                | IgA nephropathy      | 52  | Male   | Training/Discovery Phase |
| 22802                | IgA nephropathy      | 55  | Female | Training/Discovery Phase |
| 22929                | IgA nephropathy      | 55  | Female | Training/Discovery Phase |
| 23123                | IgA nephropathy      | 55  | Female | Training/Discovery Phase |
| 27917                | IgA nephropathy      | 56  | Female | Training/Discovery Phase |
| 49485                | IgA nephropathy      | 57  | Female | Training/Discovery Phase |
| 27767                | IgA nephropathy      | 57  | Male   | Training/Discovery Phase |
| 27768                | IgA nephropathy      | 57  | Male   | Training/Discovery Phase |
| 23187                | IgA nephropathy      | 63  | Male   | Training/Discovery Phase |
| 63634                | Rheumatoid arthritis | 26  | Female | Training/Discovery Phase |

| CE-MS<br>Analysis ID | Diagnosis                    | Age | Gender | Analytical Phase         |
|----------------------|------------------------------|-----|--------|--------------------------|
| 63638                | Rheumatoid arthritis         | 33  | Male   | Training/Discovery Phase |
| 63624                | Rheumatoid arthritis         | 36  | Female | Training/Discovery Phase |
| 63651                | Rheumatoid arthritis         | 37  | Male   | Training/Discovery Phase |
| 63625                | Rheumatoid arthritis         | 38  | Female | Training/Discovery Phase |
| 63671                | Rheumatoid arthritis         | 38  | Female | Training/Discovery Phase |
| 63664                | Rheumatoid arthritis         | 40  | Female | Training/Discovery Phase |
| 63636                | Rheumatoid arthritis         | 45  | Female | Training/Discovery Phase |
| 63666                | Rheumatoid arthritis         | 48  | Female | Training/Discovery Phase |
| 63667                | Rheumatoid arthritis         | 48  | Female | Training/Discovery Phase |
| 63626                | Rheumatoid arthritis         | 53  | Female | Training/Discovery Phase |
| 63640                | Rheumatoid arthritis         | 54  | Female | Training/Discovery Phase |
| 63663                | Rheumatoid arthritis         | 54  | Female | Training/Discovery Phase |
| 63669                | Rheumatoid arthritis         | 55  | Female | Training/Discovery Phase |
| 63635                | Rheumatoid arthritis         | 57  | Female | Training/Discovery Phase |
| 63670                | Rheumatoid arthritis         | 57  | Male   | Training/Discovery Phase |
| 63658                | Rheumatoid arthritis         | 58  | Female | Training/Discovery Phase |
| 63632                | Rheumatoid arthritis         | 59  | Female | Training/Discovery Phase |
| 63650                | Rheumatoid arthritis         | 59  | Female | Training/Discovery Phase |
| 63662                | Rheumatoid arthritis         | 61  | Male   | Training/Discovery Phase |
| 63665                | Rheumatoid arthritis         | 63  | Female | Training/Discovery Phase |
| 63660                | Rheumatoid arthritis         | 64  | Female | Training/Discovery Phase |
| 63647                | Rheumatoid arthritis         | 65  | Female | Training/Discovery Phase |
| 63659                | Rheumatoid arthritis         | 66  | Female | Training/Discovery Phase |
| 63628                | Rheumatoid arthritis         | 66  | Male   | Training/Discovery Phase |
| 63639                | Rheumatoid arthritis         | 67  | Female | Training/Discovery Phase |
| 63627                | Rheumatoid arthritis         | 68  | Female | Training/Discovery Phase |
| 63656                | Rheumatoid arthritis         | 69  | Male   | Training/Discovery Phase |
| 63641                | Rheumatoid arthritis         | 70  | Male   | Training/Discovery Phase |
| 63631                | Rheumatoid arthritis         | 71  | Male   | Training/Discovery Phase |
| 63646                | Rheumatoid arthritis         | 71  | Male   | Training/Discovery Phase |
| 63642                | Rheumatoid arthritis         | 74  | Female | Training/Discovery Phase |
| 63649                | Rheumatoid arthritis         | 74  | Male   | Training/Discovery Phase |
| 63654                | Rheumatoid arthritis         | 88  | Female | Training/Discovery Phase |
| 28845                | Systemic lupus erythematosus | 20  | Male   | Training/Discovery Phase |
| 31909                | Systemic lupus erythematosus | 22  | Female | Training/Discovery Phase |
| 56650                | Systemic lupus erythematosus | 22  | Female | Training/Discovery Phase |
| 28906                | Systemic lupus erythematosus | 23  | Male   | Training/Discovery Phase |
| 30311                | Systemic lupus erythematosus | 25  | Female | Training/Discovery Phase |
| 56672                | Systemic lupus erythematosus | 26  | Female | Training/Discovery Phase |
| 31879                | Systemic lupus erythematosus | 28  | Female | Training/Discovery Phase |
| 31892                | Systemic lupus erythematosus | 30  | Female | Training/Discovery Phase |
| 56654                | Systemic lupus erythematosus | 30  | Female | Training/Discovery Phase |
| 31740                | Systemic lupus erythematosus | 32  | Female | Training/Discovery Phase |
| 28904                | Systemic lupus erythematosus | 35  | Female | Training/Discovery Phase |
| 31677                | Systemic lupus erythematosus | 35  | Female | Training/Discovery Phase |
| 56657                | Systemic lupus erythematosus | 35  | Female | Training/Discovery Phase |
| 28908                | Systemic lupus erythematosus | 36  | Female | Training/Discovery Phase |
| 28919                | Systemic lupus erythematosus | 38  | Male   | Training/Discovery Phase |
| 31388                | Systemic lupus erythematosus | 39  | Female | Training/Discovery Phase |
| 56677                | Systemic lupus erythematosus | 39  | Female | Training/Discovery Phase |
| 31935                | Systemic lupus erythematosus | 44  | Female | Training/Discovery Phase |
| 56683                | Systemic lupus erythematosus | 44  | Female | Training/Discovery Phase |
| 29290                | Systemic lupus erythematosus | 45  | Female | Training/Discovery Phase |
| 28846                | Systemic lupus erythematosus | 48  | Male   | Training/Discovery Phase |
| 28854                | Systemic lupus erythematosus | 50  | Female | Training/Discovery Phase |
| 31380                | Systemic lupus erythematosus | 50  | Female | Training/Discovery Phase |
| 56653                | Systemic lupus erythematosus | 50  | Female | Training/Discovery Phase |

| CE-MS<br>Analysis ID | Diagnosis                    | Age | Gender | Analytical Phase         |
|----------------------|------------------------------|-----|--------|--------------------------|
| 56670                | Systemic lupus erythematosus | 50  | Female | Training/Discovery Phase |
| 28905                | Systemic lupus erythematosus | 53  | Male   | Training/Discovery Phase |
| 31378                | Systemic lupus erythematosus | 53  | Male   | Training/Discovery Phase |
| 56662                | Systemic lupus erythematosus | 53  | Male   | Training/Discovery Phase |
| 56690                | Systemic lupus erythematosus | 53  | Male   | Training/Discovery Phase |
| 28822                | Systemic lupus erythematosus | 57  | Male   | Training/Discovery Phase |
| 31741                | Systemic lupus erythematosus | 61  | Female | Training/Discovery Phase |
| 28907                | Systemic lupus erythematosus | 66  | Female | Training/Discovery Phase |
| 61747                | Vasculitis                   | 62  | Female | Training/Discovery Phase |
| 62100                | Vasculitis                   | 62  | Female | Training/Discovery Phase |
| 61832                | Vasculitis                   | 63  | Female | Training/Discovery Phase |
| 62114                | Vasculitis                   | 63  | Female | Training/Discovery Phase |
| 61750                | Vasculitis                   | 64  | Male   | Training/Discovery Phase |
| 61798                | Vasculitis                   | 68  | Male   | Training/Discovery Phase |
| 61799                | Vasculitis                   | 68  | Male   | Training/Discovery Phase |
| 61805                | Vasculitis                   | 68  | Male   | Training/Discovery Phase |
| 61824                | Vasculitis                   | 69  | Male   | Training/Discovery Phase |
| 61841                | Vasculitis                   | 69  | Male   | Training/Discovery Phase |
| 62104                | Vasculitis                   | 69  | Male   | Training/Discovery Phase |
| 9617                 | Vasculitis                   | 70  | Female | Training/Discovery Phase |
| 61775                | Vasculitis                   | 70  | Female | Training/Discovery Phase |
| 62120                | Vasculitis                   | 70  | Female | Training/Discovery Phase |
| 61836                | Vasculitis                   | 70  | Male   | Training/Discovery Phase |
| 61748                | Vasculitis                   | 71  | Female | Training/Discovery Phase |
| 61749                | Vasculitis                   | 75  | Male   | Training/Discovery Phase |
| 36485                | Arteriosclerosis             | 64  | Male   | Test/Validation Phase    |
| 62128                | Arteriosclerosis             | 69  | Male   | Test/Validation Phase    |
| 20073                | IgA nephropathy              | 16  | Female | Test/Validation Phase    |
| 49496                | IgA nephropathy              | 19  | Male   | Test/Validation Phase    |
| 20070                | IgA nephropathy              | 23  | Female | Test/Validation Phase    |
| 9387                 | IgA nephropathy              | 24  | Female | Test/Validation Phase    |
| 20050                | IgA nephropathy              | 25  | Male   | Test/Validation Phase    |
| 49514                | IgA nephropathy              | 26  | Female | Test/Validation Phase    |
| 49486                | IgA nephropathy              | 28  | Female | Test/Validation Phase    |
| 22782                | IgA nephropathy              | 30  | Male   | Test/Validation Phase    |
| 22927                | IgA nephropathy              | 30  | Male   | Test/Validation Phase    |
| 49499                | IgA nephropathy              | 31  | Female | Test/Validation Phase    |
| 49498                | IgA nephropathy              | 34  | Male   | Test/Validation Phase    |
| 49536                | IgA nephropathy              | 34  | Male   | Test/Validation Phase    |
| 22781                | IgA nephropathy              | 36  | Female | Test/Validation Phase    |
| 49483                | IgA nephropathy              | 38  | Female | Test/Validation Phase    |
| 27851                | IgA nephropathy              | 43  | Female | Test/Validation Phase    |
| 27822                | IgA nephropathy              | 44  | Male   | Test/Validation Phase    |
| 22951                | IgA nephropathy              | 46  | Male   | Test/Validation Phase    |
| 49545                | IgA nephropathy              | 48  | Male   | Test/Validation Phase    |
| 49490                | IgA nephropathy              | 50  | Female | Test/Validation Phase    |
| 49489                | IgA nephropathy              | 52  | Male   | Test/Validation Phase    |
| 49491                | IgA nephropathy              | 52  | Male   | Test/Validation Phase    |
| 49517                | IgA nephropathy              | 55  | Female | Test/Validation Phase    |
| 27877                | IgA nephropathy              | 56  | Female | Test/Validation Phase    |
| 27821                | IgA nephropathy              | 57  | Male   | Test/Validation Phase    |
| 27801                | IgA nephropathy              | 62  | Female | Test/Validation Phase    |
| 63648                | Rheumatoid arthritis         | 33  | Male   | Test/Validation Phase    |
| 63633                | Rheumatoid arthritis         | 34  | Female | Test/Validation Phase    |
| 63661                | Rheumatoid arthritis         | 37  | Female | Test/Validation Phase    |
| 63644                | Rheumatoid arthritis         | 39  | Female | Test/Validation Phase    |
| 63655                | Rheumatoid arthritis         | 48  | Female | Test/Validation Phase    |

| <b>CE-MS<br/>Analysis ID</b> | <b>Diagnosis</b>             | <b>Age</b> | <b>Gender</b> | <b>Analytical Phase</b> |
|------------------------------|------------------------------|------------|---------------|-------------------------|
| 63657                        | Rheumatoid arthritis         | 50         | Female        | Test/Validation Phase   |
| 63637                        | Rheumatoid arthritis         | 52         | Female        | Test/Validation Phase   |
| 63668                        | Rheumatoid arthritis         | 54         | Female        | Test/Validation Phase   |
| 63653                        | Rheumatoid arthritis         | 57         | Female        | Test/Validation Phase   |
| 63643                        | Rheumatoid arthritis         | 59         | Female        | Test/Validation Phase   |
| 63672                        | Rheumatoid arthritis         | 63         | Male          | Test/Validation Phase   |
| 63652                        | Rheumatoid arthritis         | 65         | Female        | Test/Validation Phase   |
| 63623                        | Rheumatoid arthritis         | 67         | Female        | Test/Validation Phase   |
| 63629                        | Rheumatoid arthritis         | 70         | Male          | Test/Validation Phase   |
| 63630                        | Rheumatoid arthritis         | 73         | Female        | Test/Validation Phase   |
| 63645                        | Rheumatoid arthritis         | 78         | Female        | Test/Validation Phase   |
| 34764                        | Systemic lupus erythematosus | 22         | Female        | Test/Validation Phase   |
| 31452                        | Systemic lupus erythematosus | 26         | Female        | Test/Validation Phase   |
| 56649                        | Systemic lupus erythematosus | 28         | Female        | Test/Validation Phase   |
| 30351                        | Systemic lupus erythematosus | 30         | Female        | Test/Validation Phase   |
| 56659                        | Systemic lupus erythematosus | 32         | Female        | Test/Validation Phase   |
| 28901                        | Systemic lupus erythematosus | 35         | Female        | Test/Validation Phase   |
| 30349                        | Systemic lupus erythematosus | 36         | Female        | Test/Validation Phase   |
| 56678                        | Systemic lupus erythematosus | 39         | Female        | Test/Validation Phase   |
| 28900                        | Systemic lupus erythematosus | 44         | Male          | Test/Validation Phase   |
| 30348                        | Systemic lupus erythematosus | 47         | Female        | Test/Validation Phase   |
| 56664                        | Systemic lupus erythematosus | 50         | Female        | Test/Validation Phase   |
| 56663                        | Systemic lupus erythematosus | 53         | Male          | Test/Validation Phase   |
| 56679                        | Systemic lupus erythematosus | 53         | Male          | Test/Validation Phase   |
| 56890                        | Systemic lupus erythematosus | 61         | Female        | Test/Validation Phase   |
| 61826                        | Vasculitis                   | 63         | Female        | Test/Validation Phase   |
| 61752                        | Vasculitis                   | 68         | Male          | Test/Validation Phase   |
| 61795                        | Vasculitis                   | 69         | Male          | Test/Validation Phase   |
| 61812                        | Vasculitis                   | 70         | Female        | Test/Validation Phase   |
| 61834                        | Vasculitis                   | 70         | Male          | Test/Validation Phase   |
| 61839                        | Vasculitis                   | 71         | Female        | Test/Validation Phase   |

**Supplementary Table S4. Spreadsheet 8.** Independent specificity analysis. Characterization of the independent set of patients with inflammatory diseases (n=92).

| CE-MS Analysis ID | Diagnosis | Age | Gender | Analytical Phase                 |
|-------------------|-----------|-----|--------|----------------------------------|
| 69101             | HV        |     |        | Independent specificity analysis |
| 68701             | HV        |     |        | Independent specificity analysis |
| 68884             | HV        |     |        | Independent specificity analysis |
| 68600             | HV        |     |        | Independent specificity analysis |
| 68907             | HV        |     |        | Independent specificity analysis |
| 68906             | HV        |     |        | Independent specificity analysis |
| 68752             | HV        |     |        | Independent specificity analysis |
| 68723             | HV        |     |        | Independent specificity analysis |
| 68607             | HV        |     |        | Independent specificity analysis |
| 68709             | HV        |     |        | Independent specificity analysis |
| 69165             | HV        |     |        | Independent specificity analysis |
| 68772             | HV        |     |        | Independent specificity analysis |
| 68589             | HV        |     |        | Independent specificity analysis |
| 68602             | HV        |     |        | Independent specificity analysis |
| 68749             | HV        |     |        | Independent specificity analysis |
| 68940             | HV        |     |        | Independent specificity analysis |
| 68930             | HV        |     |        | Independent specificity analysis |
| 68941             | HV        |     |        | Independent specificity analysis |
| 68601             | HV        |     |        | Independent specificity analysis |
| 68587             | HV        |     |        | Independent specificity analysis |
| 68702             | HV        |     |        | Independent specificity analysis |
| 68693             | HV        |     |        | Independent specificity analysis |
| 68608             | HV        |     |        | Independent specificity analysis |
| 68751             | HV        |     |        | Independent specificity analysis |
| 69028             | HV        |     |        | Independent specificity analysis |
| 69166             | HV        |     |        | Independent specificity analysis |
| 68708             | HV        |     |        | Independent specificity analysis |
| 68770             | HV        |     |        | Independent specificity analysis |
| 68927             | HV        |     |        | Independent specificity analysis |
| 69027             | HV        |     |        | Independent specificity analysis |
| 68905             | HV        |     |        | Independent specificity analysis |
| 68689             | HV        |     |        | Independent specificity analysis |
| 68585             | HV        |     |        | Independent specificity analysis |
| 68763             | HV        |     |        | Independent specificity analysis |
| 68696             | HV        |     |        | Independent specificity analysis |
| 69026             | HV        |     |        | Independent specificity analysis |
| 68925             | HV        |     |        | Independent specificity analysis |
| 68886             | HV        |     |        | Independent specificity analysis |
| 69100             | HV        |     |        | Independent specificity analysis |
| 105223            | HV        | 19  | Female | Independent specificity analysis |
| 105429            | HV        | 22  | Female | Independent specificity analysis |
| 105428            | HV        | 22  | Male   | Independent specificity analysis |
| 105142            | HV        | 23  | Female | Independent specificity analysis |
| 104984            | HV        | 24  | Male   | Independent specificity analysis |
| 105058            | HV        | 25  | Female | Independent specificity analysis |
| 105427            | HV        | 26  | Female | Independent specificity analysis |

| <b>CE-MS Analysis ID</b> | <b>Diagnosis</b> | <b>Age</b> | <b>Gender</b> | <b>Analytical Phase</b>          |
|--------------------------|------------------|------------|---------------|----------------------------------|
| 105132                   | HV               | 27         | Female        | Independent specificity analysis |
| 105138                   | HV               | 27         | Female        | Independent specificity analysis |
| 105133                   | HV               | 29         | Female        | Independent specificity analysis |
| 105496                   | HV               | 29         | Female        | Independent specificity analysis |
| 105225                   | HV               | 31         | Female        | Independent specificity analysis |
| 105224                   | HV               | 33         | Female        | Independent specificity analysis |
| 104985                   | HV               | 33         | Male          | Independent specificity analysis |
| 105053                   | HV               | 35         | Female        | Independent specificity analysis |
| 104982                   | HV               | 35         | Female        | Independent specificity analysis |
| 105139                   | HV               | 39         | Female        | Independent specificity analysis |
| 105144                   | HV               | 39         | Female        | Independent specificity analysis |
| 105130                   | HV               | 47         | Female        | Independent specificity analysis |
| 69176                    | SLE              |            |               | Independent specificity analysis |
| 69034                    | SLE              |            |               | Independent specificity analysis |
| 68700                    | SLE              |            |               | Independent specificity analysis |
| 68707                    | SLE              |            |               | Independent specificity analysis |
| 68591                    | SLE              |            |               | Independent specificity analysis |
| 68691                    | SLE              |            |               | Independent specificity analysis |
| 68692                    | SLE              |            |               | Independent specificity analysis |
| 69170                    | SLE              |            |               | Independent specificity analysis |
| 68724                    | SLE              |            |               | Independent specificity analysis |
| 69102                    | SLE              |            |               | Independent specificity analysis |
| 69025                    | SLE              |            |               | Independent specificity analysis |
| 69172                    | SLE              |            |               | Independent specificity analysis |
| 68785                    | SLE              |            |               | Independent specificity analysis |
| 68887                    | SLE              |            |               | Independent specificity analysis |
| 68703                    | SLE              |            |               | Independent specificity analysis |
| 68904                    | SLE              |            |               | Independent specificity analysis |
| 105514                   | SLE              | 27         | Female        | Independent specificity analysis |
| 105135                   | SLE              | 29         | Female        | Independent specificity analysis |
| 105003                   | SLE              | 31         | Female        | Independent specificity analysis |
| 105004                   | SLE              | 31         | Male          | Independent specificity analysis |
| 105063                   | SLE              | 36         | Female        | Independent specificity analysis |
| 105513                   | SLE              | 37         | Female        | Independent specificity analysis |
| 105222                   | SLE              | 37         | Female        | Independent specificity analysis |
| 105506                   | SLE              | 39         | Female        | Independent specificity analysis |
| 104997                   | SLE              | 40         | Female        | Independent specificity analysis |
| 105064                   | SLE              | 42         | Female        | Independent specificity analysis |
| 104993                   | SLE              | 44         | Female        | Independent specificity analysis |
| 105221                   | SLE              | 46         | Female        | Independent specificity analysis |
| 105507                   | SLE              | 46         | Female        | Independent specificity analysis |
| 105220                   | SLE              | 49         | Female        | Independent specificity analysis |
| 105667                   | SLE              | 51         | Female        | Independent specificity analysis |
| 105787                   | SLE              | 55         | Female        | Independent specificity analysis |
| 105239                   | SLE              | 55         | Male          | Independent specificity analysis |
| 105061                   | SLE              | 63         | Female        | Independent specificity analysis |

**Abbreviations: HV, Hypersensitivity Vasculitis; SLE, Systemic Lupus erythematosus;**

**Supplementary Table S4. Spreadsheet 9.** Additional validation phase. Characterization of the additional set of patients with other cancer types (n=40).

| CE-MS Analysis ID | Diagnosis                 | Age | Gender | Analytical Phase            |
|-------------------|---------------------------|-----|--------|-----------------------------|
| 35492             | AML                       | 17  | Male   | Additional Validation Phase |
| 44174             | AML                       | 19  | Male   | Additional Validation Phase |
| 35367             | AML                       | 30  | Male   | Additional Validation Phase |
| 42292             | AML                       | 32  | Female | Additional Validation Phase |
| 78337             | AML                       | 34  | Male   | Additional Validation Phase |
| 44581             | AML                       | 35  | Female | Additional Validation Phase |
| 39136             | AML                       | 39  | Male   | Additional Validation Phase |
| 44586             | AML                       | 48  | Male   | Additional Validation Phase |
| 44599             | AML                       | 49  | Male   | Additional Validation Phase |
| 44582             | AML                       | 50  | Female | Additional Validation Phase |
| 39119             | AML                       | 50  | Male   | Additional Validation Phase |
| 44598             | AML                       | 50  | Male   | Additional Validation Phase |
| 44597             | AML                       | 53  | Female | Additional Validation Phase |
| 48548             | AML                       | 53  | Female | Additional Validation Phase |
| 79802             | AML                       | 55  | Female | Additional Validation Phase |
| 20804             | AML                       | 56  | Male   | Additional Validation Phase |
| 79801             | AML                       | 56  | Male   | Additional Validation Phase |
| 44587             | AML                       | 57  | Male   | Additional Validation Phase |
| 36664             | AML                       | 59  | Female | Additional Validation Phase |
| 40169             | AML                       | 59  | Female | Additional Validation Phase |
| 44584             | AML                       | 59  | Female | Additional Validation Phase |
| 78401             | AML                       | 60  | Male   | Additional Validation Phase |
| 40213             | AML                       | 61  | Female | Additional Validation Phase |
| 44360             | AML                       | 61  | Male   | Additional Validation Phase |
| 44600             | AML                       | 62  | Female | Additional Validation Phase |
| 44588             | AML                       | 65  | Female | Additional Validation Phase |
| 44585             | AML                       | 70  | Female | Additional Validation Phase |
| 36195             | Breast cancer             | 39  | Female | Additional Validation Phase |
| 51708             | Bronchial cancer          | 74  | Male   | Additional Validation Phase |
| 99912             | Haemangioma               | 33  | Female | Additional Validation Phase |
| 38622             | Metastatic Breast cancer  | 39  | Female | Additional Validation Phase |
| 38663             | Metastatic Breast cancer  | 39  | Female | Additional Validation Phase |
| 38644             | Metastatic Breast cancer  | 61  | Female | Additional Validation Phase |
| 38445             | Metastatic Stomach cancer | 40  | Male   | Additional Validation Phase |
| 38478             | Metastatic Stomach cancer | 59  | Male   | Additional Validation Phase |
| 38447             | Metastatic Colon cancer   | 63  | Male   | Additional Validation Phase |
| 38462             | Metastatic Stomach cancer | 66  | Female | Additional Validation Phase |
| 99518             | Neuroendocrine tumor      | 40  | Female | Additional Validation Phase |
| 99252             | Neuroendocrine tumor      | 68  | Male   | Additional Validation Phase |
| 51606             | Small cell lung cancer    | 49  | Male   | Additional Validation Phase |

**Abbreviations: AML, Acute Myeloid Leukemia**
